# Supplementary material for: The Effect of Life History on Retroviral Genome Invasions
Source: PLoS One. 2015 Feb 18;10(2):e0117442. doi: 10.1371/journal.pone.0117442 (PMC4333357; doi:10.1371/journal.pone.0117442)
Supplement: S2 Table — (XLSX) [file pone.0117442.s002.xlsx]

## Sheet: mouse pubmed_result.txt
Table S2 Pubmed search results to assess the effort focused on the ERVs of a particular species
Monodelphis domestica	Gray short-tailed opossum	Gentles AJ, Wakefield MJ, Kohany O, Gu W, Batzer MA, Pollock DD, Jurka J. Evolutionary dynamics of transposable elements in the short-tailed opossum Monodelphis domestica. Genome Res. 2007 Jul;17(7):992-1004. Epub 2007 May 10. PubMed PMID: 17495012; PubMed Central PMCID: PMC1899126.
Mus cervicolor	Fawn-coloured mouse	Tipper CH, Cingöz O, Coffin JM. Mus spicilegus endogenous retrovirus HEMV uses murine sodium-dependent myo-inositol transporter 1 as a receptor. J Virol. 2012 Jun;86(11):6341-4. doi: 10.1128/JVI.00083-12. Epub 2012 Mar 28. PubMed PMID:
		Kuff EL, Lueders KK, Scolnick EM. Nucleotide sequence relationship between intracisternal type A particles of Mus musculus and an endogenous retrovirus (M432) of Mus cervicolor. J Virol. 1978 Oct;28(1):66-74. PubMed PMID: 212615; PubMed Central PMCID: PMC354248.
		Escot C, Hogg E, Callahan R. Mammary tumorigenesis in feral Mus cervicolor popaeus. J Virol. 1986 May;58(2):619-25. PubMed PMID: 3009873; PubMed Central PMCID: PMC252952.
Mus caroli	Ryukyu mouse	Yap MW, Colbeck E, Ellis SA, Stoye JP. Evolution of the retroviral restriction gene Fv1: inhibition of non-MLV retroviruses. PLoS Pathog. 2014 Mar 6;10(3):e1003968. doi: 10.1371/journal.ppat.1003968. eCollection 2014 Mar. PubMed PMID: 24603659; PubMed Central PMCID: PMC3948346.
		Miller AD, Bergholz U, Ziegler M, Stocking C. Identification of the myelin protein plasmolipin as the cell entry receptor for Mus caroli endogenous retrovirus. J Virol. 2008 Jul;82(14):6862-8. doi: 10.1128/JVI.00397-08. Epub 2008 May 7. PubMed PMID: 18463156; PubMed Central PMCID: PMC2446966.
		Ono M, Kitasato H, Ohishi H, Motobayashi-Nakajima Y. Molecular cloning and long terminal repeat sequences of intracisternal A-particle genes in Mus caroli. J Virol. 1984 May;50(2):352-8. PubMed PMID: 6708171; PubMed Central PMCID: PMC255627.
		Benveniste RE, Callahan R, Sherr CJ, Chapman V, Todaro GJ. Two distinct endogenous type C viruses isolated from the asian rodent Mus cervicolor: conservation of virogene sequences in related rodent species. J Virol. 1977 Mar;21(3):849-62. PubMed PMID: 66330; PubMed Central PMCID: PMC515622.
Mus musculus	Mouse	Choi JY, Gwon YD, Kim JK, Cho YD, Heo YK, Cho HS, Choi TJ, Poo HR, Oh YK, Kim YB. Protective efficacy of a human endogenous retrovirus envelope-coated, nonreplicable, baculovirus-based hemagglutin vaccine against pandemic influenza H1N1 2009. PLoS One. 2013 Nov 18;8(11):e80762. doi: 10.1371/journal.pone.0080762. eCollection 2013. PubMed PMID: 24260476; PubMed Central PMCID: PMC3832454.
		Kraus B, Fischer K, B√ºchner SM, Wels WS, L√∂wer R, Sliva K, Schnierle BS. Vaccination directed against the human endogenous retrovirus-K envelope protein inhibits tumor growth in a murine model system. PLoS One. 2013 Aug 30;8(8):e72756. doi: 10.1371/journal.pone.0072756. eCollection 2013. PubMed PMID: 24023643; PubMed Central PMCID: PMC3758348.
		Morozov VA, Dao Thi VL, Denner J. The transmembrane protein of the human endogenous retrovirus--K (HERV-K) modulates cytokine release and gene expression. PLoS One. 2013 Aug 7;8(8):e70399. doi: 10.1371/journal.pone.0070399. eCollection 2013. PubMed PMID: 23950929; PubMed Central PMCID: PMC3737193.
		Zhang Y, Babaian A, Gagnier L, Mager DL. Visualized computational predictions of transcriptional effects by intronic endogenous retroviruses. PLoS One. 2013 Aug 6;8(8):e71971. doi: 10.1371/journal.pone.0071971. Print 2013. PubMed PMID: 23936536; PubMed Central PMCID: PMC3735543.
		Henke C, Ruebner M, Faschingbauer F, Stolt CC, Schaefer N, Lang N, Beckmann MW, Strissel PL, Strick R. Regulation of murine placentogenesis by the retroviral genes Syncytin-A, Syncytin-B and Peg10. Differentiation. 2013 Apr-Jun;85(4-5):150-60. doi: 10.1016/j.diff.2013.02.002. Epub 2013 Jun 25. PubMed PMID: 23807393.
		Hempel HA, Burns KH, De Marzo AM, Sfanos KS. Infection of Xenotransplanted Human Cell Lines by Murine Retroviruses: A Lesson Brought Back to Light by XMRV. Front Oncol. 2013 Jun 17;156. doi: 10.3389/fonc.2013.00156. eCollection 2013. PubMed PMID: 23785669; PubMed Central PMCID: PMC3683812.
		Qian L, Berry EC, Fu JD, Ieda M, Srivastava D. Reprogramming of mouse fibroblasts into cardiomyocyte-like cells in vitro. Nat Protoc. 2013 Jun;8(6):1204-15. doi: 10.1038/nprot.2013.067. Epub 2013 May 30. PubMed PMID: 23722259.
		Stavrou S, Nitta T, Kotla S, Ha D, Nagashima K, Rein AR, Fan H, Ross SR. Murine leukemia virus glycosylated Gag blocks apolipoprotein B editing complex 3 and cytosolic sensor access to the reverse transcription complex. Proc Natl Acad Sci U S A. 2013 May 28;110(22):9078-83. doi: 10.1073/pnas.1217399110. Epub 2013 May 13. PubMed PMID: 23671100; PubMed Central PMCID: PMC3670389.
		Shimode S, Nakaoka R, Shogen H, Miyazawa T. Characterization of feline ASCT1 and ASCT2 as RD-114 virus receptor. J Gen Virol. 2013 Jul;94(Pt 7):1608-12. doi: 10.1099/vir.0.052928-0. Epub 2013 Apr 11. PubMed PMID: 23580426.
		Esnault C, Cornelis G, Heidmann O, Heidmann T. Differential evolutionary fate of an ancestral primate endogenous retrovirus envelope gene, the EnvV syncytin, captured for a function in placentation. PLoS Genet. 2013 Mar;9(3):e1003400. doi: 10.1371/journal.pgen.1003400. Epub 2013 Mar 28. PubMed PMID: 23555306; PubMed Central PMCID: PMC3610889.
		Ito K, Baudino L, Kihara M, Leroy V, Vyse TJ, Evans LH, Izui S. Three Sgp loci act independently as well as synergistically to elevate the expression of specific endogenous retroviruses implicated in murine lupus. J Autoimmun. 2013 Jun;10-7. doi: 10.1016/j.jaut.2013.01.014. Epub 2013 Mar 7. PubMed PMID: 23465716; PubMed Central PMCID: PMC3672360.
		Koito A, Ikeda T. Intrinsic immunity against retrotransposons by APOBEC cytidine deaminases. Front Microbiol. 2013 Feb 20;28. doi: 10.3389/fmicb.2013.00028. eCollection 2013. PubMed PMID: 23431045; PubMed Central PMCID: PMC3576619.
		Gifford WD, Pfaff SL, Macfarlan TS. Transposable elements as genetic regulatory substrates in early development. Trends Cell Biol. 2013 May;23(5):218-26. doi: 10.1016/j.tcb.2013.01.001. Epub 2013 Feb 12. Review. PubMed PMID: 23411159; PubMed Central PMCID: PMC4034679.
		Chuong EB, Rumi MA, Soares MJ, Baker JC. Endogenous retroviruses function as species-specific enhancer elements in the placenta. Nat Genet. 2013 Mar;45(3):325-9. doi: 10.1038/ng.2553. Epub 2013 Feb 10. PubMed PMID: 23396136; PubMed Central PMCID: PMC3789077.
		Lee YJ, Jeong BH, Choi EK, Carp RI, Kim YS. Complete genome sequences of new xenotropic murine leukemia viruses from the senescence-accelerated mouse (SAM): molecular and phylogenetic analyses. PLoS One. 2013;8(2):e55669. doi: 10.1371/journal.pone.0055669. Epub 2013 Feb 5. PubMed PMID: 23393596; PubMed Central PMCID: PMC3564811.
		Herquel B, Ouararhni K, Martianov I, Le Gras S, Ye T, Keime C, Lerouge T, Jost B, Cammas F, Losson R, Davidson I. Trim24-repressed VL30 retrotransposons regulate gene expression by producing noncoding RNA. Nat Struct Mol Biol. 2013 Mar;20(3):339-46. doi: 10.1038/nsmb.2496. Epub 2013 Feb 3. PubMed PMID: 23377542.
		Wolf G, Nielsen AL, Mikkelsen JG, Pedersen FS. Epigenetic marking and repression of porcine endogenous retroviruses. J Gen Virol. 2013 May;94(Pt 5):960-70. doi: 10.1099/vir.0.049288-0. Epub 2013 Jan 16. PubMed PMID: 23324470.
		Rowe HM, Friedli M, Offner S, Verp S, Mesnard D, Marquis J, Aktas T, Trono D. De novo DNA methylation of endogenous retroviruses is shaped by KRAB-ZFPs/KAP1 and ESET. Development. 2013 Feb 1;140(3):519-29. doi: 10.1242/dev.087585. PubMed PMID: 23293284.
		Lee KH, Lim D, Green T, Greenhalgh D, Cho K. Injury-elicited stressors alter endogenous retrovirus expression in lymphocytes depending on cell type and source lymphoid organ. BMC Immunol. 2013 Jan 5;2. doi: 10.1186/1471-2172-14-2. PubMed PMID: 23289855; PubMed Central PMCID: PMC3562510.
		Cianciolo GJ, Pizzo SV. Anti-inflammatory and vasoprotective activity of a retroviral-derived peptide, homologous to human endogenous retroviruses: endothelial cell effects. PLoS One. 2012;7(12):e52693. doi: 10.1371/journal.pone.0052693. Epub 2012 Dec 20. PubMed PMID: 23285152; PubMed Central PMCID: PMC3527569.
		Cegolon L, Salata C, Weiderpass E, Vineis P, Pal√π G, Mastrangelo G. Human endogenous retroviruses and cancer prevention: evidence and prospects. BMC Cancer. 2013 Jan 3;4. doi: 10.1186/1471-2407-13-4. PubMed PMID: 23282240; PubMed Central PMCID: PMC3557136.
		Rowe HM, Kapopoulou A, Corsinotti A, Fasching L, Macfarlan TS, Tarabay Y, Viville S, Jakobsson J, Pfaff SL, Trono D. TRIM28 repression of retrotransposon-based enhancers is necessary to preserve transcriptional dynamics in embryonic stem cells. Genome Res. 2013 Mar;23(3):452-61. doi: 10.1101/gr.147678.112. Epub 2012 Dec 10. PubMed PMID: 23233547; PubMed Central PMCID: PMC3589534.
		Henzy JE, Coffin JM. Betaretroviral envelope subunits are noncovalently associated and restricted to the mammalian class. J Virol. 2013 Feb;87(4):1937-46. doi: 10.1128/JVI.01442-12. Epub 2012 Dec 5. PubMed PMID: 23221553; PubMed Central PMCID: PMC3571459.
		Lee HJ, Hur YK, Cho YD, Kim MG, Lee HT, Oh YK, Kim YB. Immunogenicity of bivalent human papillomavirus DNA vaccine using human endogenous retrovirus envelope-coated baculoviral vectors in mice and pigs. PLoS One. 2012;7(11):e50296. doi: 10.1371/journal.pone.0050296. Epub 2012 Nov 27. PubMed PMID: 23209698; PubMed Central PMCID: PMC3507738.
		Lee KH, You RN, Greenhalgh DG, Cho K. Identification of a group of Mus dunni endogenous virus-like endogenous retroviruses from the C57BL/6J mouse genome: proviral genomes, strain distribution, expression characteristics, and genomic integration profile. Chromosome Res. 2012 Oct;20(7):859-74. doi: 10.1007/s10577-012-9322-z. Epub 2012 Nov 30. PubMed PMID: 23197326; PubMed Central PMCID: PMC3535300.
		Inoue A, Matoba S, Zhang Y. Transcriptional activation of transposable elements in mouse zygotes is independent of Tet3-mediated 5-methylcytosine oxidation. Cell Res. 2012 Dec;22(12):1640-9. doi: 10.1038/cr.2012.160. Epub 2012 Nov 27. PubMed PMID: 23184059; PubMed Central PMCID: PMC3515759.
		Sharif J, Shinkai Y, Koseki H. Is there a role for endogenous retroviruses to mediate long-term adaptive phenotypic response upon environmental inputs? Philos Trans R Soc Lond B Biol Sci. 2013 Jan 5;368(1609):20110340. doi: 10.1098/rstb.2011.0340. Review. PubMed PMID: 23166400; PubMed Central PMCID: PMC3539365.
		Yu P, L√ºbben W, Slomka H, Gebler J, Konert M, Cai C, Neubrandt L, Prazeres da Costa O, Paul S, Dehnert S, D√∂hne K, Thanisch M, Storsberg S, Wiegand L, Kaufmann A, Nain M, Quintanilla-Martinez L, Bettio S, Schnierle B, Kolesnikova L, Becker S, Schnare M, Bauer S. Nucleic acid-sensing Toll-like receptors are essential for the control of endogenous retrovirus viremia and ERV-induced tumors. Immuni…
		Metzner M, J√§ck HM, Wabl M. LINE-1 retroelements complexed and inhibited by activation induced cytidine deaminase. PLoS One. 2012;7(11):e49358. doi: 10.1371/journal.pone.0049358. Epub 2012 Nov 2. PubMed PMID: 23133680; PubMed Central PMCID: PMC3487726.
		Young GR, Eksmond U, Salcedo R, Alexopoulou L, Stoye JP, Kassiotis G. Resurrection of endogenous retroviruses in antibody-deficient mice. Nature. 2012 Nov 29;491(7426):774-8. doi: 10.1038/nature11599. Epub 2012 Oct 24. PubMed PMID: 23103862; PubMed Central PMCID: PMC3511586.
		Rebollo R, Miceli-Royer K, Zhang Y, Farivar S, Gagnier L, Mager DL. Epigenetic interplay between mouse endogenous retroviruses and host genes. Genome Biol. 2012 Oct 3;13(10):R89. doi: 10.1186/gb-2012-13-10-r89. PubMed PMID: 23034137; PubMed Central PMCID: PMC3491417.
		Lee D, Das Gupta J, Gaughan C, Steffen I, Tang N, Luk KC, Qiu X, Urisman A, Fischer N, Molinaro R, Broz M, Schochetman G, Klein EA, Ganem D, Derisi JL, Simmons G, Hackett J Jr, Silverman RH, Chiu CY. In-depth investigation of archival and prospectively collected samples reveals no evidence for XMRV infection in prostate cancer. PLoS One. 2012;7(9):e44954. doi: 10.1371/journal.pone.0044954. Epub 2…
		Han SE, Kim MG, Lee S, Cho HJ, Byun Y, Kim S, Kim YB, Choi Y, Oh YK. Initial preclinical safety of non-replicating human endogenous retrovirus envelope protein-coated baculovirus vector-based vaccines against human papillomavirus. J Appl Toxicol. 2013 Dec;33(12):1474-83. doi: 10.1002/jat.2815. Epub 2012 Sep 14. PubMed PMID: 22987290.
		Brown K, Moreton J, Malla S, Aboobaker AA, Emes RD, Tarlinton RE. Characterisation of retroviruses in the horse genome and their transcriptional activity via transcriptome sequencing. Virology. 2012 Nov 10;433(1):55-63. doi: 10.1016/j.virol.2012.07.010. Epub 2012 Aug 4. PubMed PMID: 22868041.
		Hull S, Lim J, Hamil A, Nitta T, Fan H. Analysis of jaagsiekte sheep retrovirus (JSRV) envelope protein domains in transformation. Virus Genes. 2012 Dec;45(3):508-17. doi: 10.1007/s11262-012-0793-y. Epub 2012 Aug 4. PubMed PMID: 22864547; PubMed Central PMCID: PMC3775717.
		Guallar D, P√©rez-Palacios R, Climent M, Mart√≠nez-Abad√≠a I, Larraga A, Fern√°ndez-Juan M, Vallejo C, Muniesa P, Schoorlemmer J. Expression of endogenous retroviruses is negatively regulated by the pluripotency marker Rex1/Zfp42. Nucleic Acids Res. 2012 Oct;40(18):8993-9007. doi: 10.1093/nar/gks686. Epub 2012 Jul 25. PubMed PMID: 22844087; PubMed Central PMCID: PMC3467079.
		Sacha JB, Kim IJ, Chen L, Ullah JH, Goodwin DA, Simmons HA, Schenkman DI, von Pelchrzim F, Gifford RJ, Nimityongskul FA, Newman LP, Wildeboer S, Lappin PB, Hammond D, Castrovinci P, Piaskowski SM, Reed JS, Beheler KA, Tharmanathan T, Zhang N, Muscat-King S, Rieger M, Fernandes C, Rumpel K, Gardner JP 2nd, Gebhard DH, Janies J, Shoieb A, Pierce BG, Trajkovic D, Rakasz E, Rong S, McCluskie M, Chris…
		Isbel L, Whitelaw E. Endogenous retroviruses in mammals: an emerging picture of how ERVs modify expression of adjacent genes. Bioessays. 2012 Sep;34(9):734-8. doi: 10.1002/bies.201200056. Epub 2012 Jun 26. PubMed PMID: 22736292.
		Hanke K, Chudak C, Kurth R, Bannert N. The Rec protein of HERV-K(HML-2) upregulates androgen receptor activity by binding to the human small glutamine-rich tetratricopeptide repeat protein (hSGT). Int J Cancer. 2013 Feb 1;132(3):556-67. doi: 10.1002/ijc.27693. Epub 2012 Jul 14. PubMed PMID: 22733359.
		Macfarlan TS, Gifford WD, Driscoll S, Lettieri K, Rowe HM, Bonanomi D, Firth A, Singer O, Trono D, Pfaff SL. Embryonic stem cell potency fluctuates with endogenous retrovirus activity. Nature. 2012 Jul 5;487(7405):57-63. doi: 10.1038/nature11244. PubMed PMID: 22722858; PubMed Central PMCID: PMC3395470.
		Nell√•ker C, Keane TM, Yalcin B, Wong K, Agam A, Belgard TG, Flint J, Adams DJ, Frankel WN, Ponting CP. The genomic landscape shaped by selection on transposable elements across 18 mouse strains. Genome Biol. 2012 Jun 15;13(6):R45. doi: 10.1186/gb-2012-13-6-r45. PubMed PMID: 22703977; PubMed Central PMCID: PMC3446317.
		Dupressoir A, Lavialle C, Heidmann T. From ancestral infectious retroviruses to bona fide cellular genes: role of the captured syncytins in placentation. Placenta. 2012 Sep;33(9):663-71. doi: 10.1016/j.placenta.2012.05.005. Epub 2012 Jun 12. Review. PubMed PMID: 22695103.
		Cui J, Tachedjian G, Tachedjian M, Holmes EC, Zhang S, Wang LF. Identification of diverse groups of endogenous gammaretroviruses in mega- and microbats. J Gen Virol. 2012 Sep;93(Pt 9):2037-45. doi: 10.1099/vir.0.043760-0. Epub 2012 Jun 13. PubMed PMID: 22694899.
		Kao D, Hsu K, Chiu S, Tu V, Chew A, Lee KH, Lee YK, Kwon DN, Greenhalgh DG, Cho K. ERE database: a database of genomic maps and biological properties of endogenous retroviral elements in the C57BL/6J mouse genome. Genomics. 2012 Sep;100(3):157-61. doi: 10.1016/j.ygeno.2012.06.002. Epub 2012 Jun 9. PubMed PMID: 22691267; PubMed Central PMCID: PMC3428438.
		Sanchez-Martinez S, Aloia AL, Harvin D, Mirro J, Gorelick RJ, Jern P, Coffin JM, Rein A. Studies on the restriction of murine leukemia viruses by mouse APOBEC3. PLoS One. 2012;7(5):e38190. doi: 10.1371/journal.pone.0038190. Epub 2012 May 29. PubMed PMID: 22666481; PubMed Central PMCID: PMC3362552.
		Koshi K, Suzuki Y, Nakaya Y, Imai K, Hosoe M, Takahashi T, Kizaki K, Miyazawa T, Hashizume K. Bovine trophoblastic cell differentiation and binucleation involves enhanced endogenous retrovirus element expression. Reprod Biol Endocrinol. 2012 May 25;41. doi: 10.1186/1477-7827-10-41. PubMed PMID: 22632112; PubMed Central PMCID: PMC3419082.
		Young GR, Ploquin MJ, Eksmond U, Wadwa M, Stoye JP, Kassiotis G. Negative selection by an endogenous retrovirus promotes a higher-avidity CD4+ T cell response to retroviral infection. PLoS Pathog. 2012;8(5):e1002709. doi: 10.1371/journal.ppat.1002709. Epub 2012 May 10. PubMed PMID: 22589728; PubMed Central PMCID: PMC3349761.
		Konisti S, Mantziou S, Markopoulos G, Thrasyvoulou S, Vartholomatos G, Sainis I, Kolettas E, Noutsopoulos D, Tzavaras T. H2O2 signals via iron induction of VL30 retrotransposition correlated with cytotoxicity. Free Radic Biol Med. 2012 May 15;52(10):2072-81. doi: 10.1016/j.freeradbiomed.2012.03.021. Epub 2012 Apr 19. PubMed PMID: 22542446.
		Wu Y, Qi X, Gong L, Xing G, Chen M, Miao L, Yao J, Suzuki T, Furihata C, Luan Y, Ren J. Identification of BC005512 as a DNA damage responsive murine endogenous retrovirus of GLN family involved in cell growth regulation. PLoS One. 2012;7(4):e35010. doi: 10.1371/journal.pone.0035010. Epub 2012 Apr 13. PubMed PMID: 22514700; PubMed Central PMCID: PMC3325921.
		Leroy V, Kihara M, Baudino L, Brighouse G, Evans LH, Izui S. Sgp3 and TLR7 stimulation differentially alter the expression profile of modified polytropic retroviruses implicated in murine systemic lupus. J Autoimmun. 2012 Jun;38(4):361-8. doi: 10.1016/j.jaut.2012.03.002. Epub 2012 Apr 13. PubMed PMID: 22503566; PubMed Central PMCID: PMC3358543.
		Mangeat B, Cavagliotti L, Lehmann M, Gers-Huber G, Kaur I, Thomas Y, Kaiser L, Piguet V. Influenza virus partially counteracts restriction imposed by tetherin/BST-2. J Biol Chem. 2012 Jun 22;287(26):22015-29. doi: 10.1074/jbc.M111.319996. Epub 2012 Apr 6. PubMed PMID: 22493439; PubMed Central PMCID: PMC3381161.
		Li Z, Ender C, Meister G, Moore PS, Chang Y, John B. Extensive terminal and asymmetric processing of small RNAs from rRNAs, snoRNAs, snRNAs, and tRNAs. Nucleic Acids Res. 2012 Aug;40(14):6787-99. doi: 10.1093/nar/gks307. Epub 2012 Apr 9. PubMed PMID: 22492706; PubMed Central PMCID: PMC3413118.
		Barrett BS, Smith DS, Li SX, Guo K, Hasenkrug KJ, Santiago ML. A single nucleotide polymorphism in tetherin promotes retrovirus restriction in vivo. PLoS Pathog. 2012;8(3):e1002596. doi: 10.1371/journal.ppat.1002596. Epub 2012 Mar 22. PubMed PMID: 22457621; PubMed Central PMCID: PMC3310811.
		Tipper CH, Cing√∂z O, Coffin JM. Mus spicilegus endogenous retrovirus HEMV uses murine sodium-dependent myo-inositol transporter 1 as a receptor. J Virol. 2012 Jun;86(11):6341-4. doi: 10.1128/JVI.00083-12. Epub 2012 Mar 28. PubMed PMID: 22457525; PubMed Central PMCID: PMC3372175.
		Kozak CA. Viewpoint on Emv2, the onlhy endogenous ecotropic murine leukemia virus of C57BL/6 mice. Retrovirology. 2012 Mar 22;25. doi: 10.1186/1742-4690-9-25. PubMed PMID: 22439739; PubMed Central PMCID: PMC3338084.
		Lee KH, Cho K. Reply to Emv2, the only endogenous ecotropic murine leukemia virus of C57BL/6J mice. Retrovirology. 2012 Mar 22;24. doi: 10.1186/1742-4690-9-24. PubMed PMID: 22439701; PubMed Central PMCID: PMC3342886.
		Young GR, Kassiotis G, Stoye JP. Emv2, the only endogenous ecotropic murine leukemia virus of C57BL/6J mice. Retrovirology. 2012 Mar 22;23. doi: 10.1186/1742-4690-9-23. PubMed PMID: 22439680; PubMed Central PMCID: PMC3337817.
		Zhao X, Ross EJ, Wang Y, Horwitz BH. Nfkb1 inhibits LPS-induced IFN-Œ≤ and IL-12 p40 production in macrophages by distinct mechanisms. PLoS One. 2012;7(3):e32811. doi: 10.1371/journal.pone.0032811. Epub 2012 Mar 12. PubMed PMID: 22427889; PubMed Central PMCID: PMC3299705.
		Li J, Akagi K, Hu Y, Trivett AL, Hlynialuk CJ, Swing DA, Volfovsky N, Morgan TC, Golubeva Y, Stephens RM, Smith DE, Symer DE. Mouse endogenous retroviruses can trigger premature transcriptional termination at a distance. Genome Res. 2012 May;22(5):870-84. doi: 10.1101/gr.130740.111. Epub 2012 Feb 23. PubMed PMID: 22367191; PubMed Central PMCID: PMC3337433.
		Thomson AJ, Pierart H, Meek S, Bogerman A, Sutherland L, Murray H, Mountjoy E, Downing A, Talbot R, Sartori C, Whitelaw CB, Freeman TC, Archibald AL, Burdon T. Reprogramming pig fetal fibroblasts reveals a functional LIF signaling pathway. Cell Reprogram. 2012 Apr;14(2):112-22. doi: 10.1089/cell.2011.0078. Epub 2012 Feb 17. PubMed PMID: 22339199.
		Kozak CA. Naturally Occurring Polymorphisms of the Mouse Gammaretrovirus Receptors CAT-1 and XPR1 Alter Virus Tropism and Pathogenicity. Adv Virol. 2011;975801. doi: 10.1155/2011/975801. Epub 2011 Oct 23. PubMed PMID: 22312361; PubMed Central PMCID: PMC3265322.
		Hisada K, S√°nchez C, Endo TA, Endoh M, Rom√°n-Trufero M, Sharif J, Koseki H, Vidal M. RYBP represses endogenous retroviruses and preimplantation- and germ line-specific genes in mouse embryonic stem cells. Mol Cell Biol. 2012 Mar;32(6):1139-49. doi: 10.1128/MCB.06441-11. Epub 2012 Jan 23. PubMed PMID: 22269950; PubMed Central PMCID: PMC3295013.
		Roberts KA, Abraira VE, Tucker AF, Goodrich LV, Andrews NC. Mutation of Rubie, a novel long non-coding RNA located upstream of Bmp4, causes vestibular malformation in mice. PLoS One. 2012;7(1):e29495. doi: 10.1371/journal.pone.0029495. Epub 2012 Jan 12. PubMed PMID: 22253730; PubMed Central PMCID: PMC3257225.
		Wang-Johanning F, Rycaj K, Plummer JB, Li M, Yin B, Frerich K, Garza JG, Shen J, Lin K, Yan P, Glynn SA, Dorsey TH, Hunt KK, Ambs S, Johanning GL. Immunotherapeutic potential of anti-human endogenous retrovirus-K envelope protein antibodies in targeting breast tumors. J Natl Cancer Inst. 2012 Feb 8;104(3):189-210. doi: 10.1093/jnci/djr540. Epub 2012 Jan 12. PubMed PMID: 22247020; PubMed Central P…
		Leung DC, Lorincz MC. Silencing of endogenous retroviruses: when and why do histone marks predominate? Trends Biochem Sci. 2012 Apr;37(4):127-33. doi: 10.1016/j.tibs.2011.11.006. Epub 2011 Dec 15. PubMed PMID: 22178137.
		Vitullo P, Sciamanna I, Baiocchi M, Sinibaldi-Vallebona P, Spadafora C. LINE-1 retrotransposon copies are amplified during murine early embryo development. Mol Reprod Dev. 2012 Feb;79(2):118-27. doi: 10.1002/mrd.22003. Epub 2011 Dec 2. PubMed PMID: 22139884.
		Brown JD, Piccuillo V, O'Neill RJ. Retroelement demethylation associated with abnormal placentation in Mus musculus x Mus caroli hybrids. Biol Reprod. 2012 Mar 30;86(3):88. doi: 10.1095/biolreprod.111.095273. Print 2012 Mar. PubMed PMID: 22116807.
		Chen Z, Kolokoltsov AA, Wang J, Adhikary S, Lorinczi M, Elferink LA, Davey RA. GRB2 interaction with the ecotropic murine leukemia virus receptor, mCAT-1, controls virus entry and is stimulated by virus binding. J Virol. 2012 Feb;86(3):1421-32. doi: 10.1128/JVI.05993-11. Epub 2011 Nov 16. PubMed PMID: 22090132; PubMed Central PMCID: PMC3264351.
		Cing√∂z O, Paprotka T, Delviks-Frankenberry KA, Wildt S, Hu WS, Pathak VK, Coffin JM. Characterization, mapping, and distribution of the two XMRV parental proviruses. J Virol. 2012 Jan;86(1):328-38. doi: 10.1128/JVI.06022-11. Epub 2011 Oct 26. PubMed PMID: 22031947; PubMed Central PMCID: PMC3255884.
		Dewannieux M, Vernochet C, Ribet D, Bartosch B, Cosset FL, Heidmann T. The mouse IAPE endogenous retrovirus can infect cells through any of the five GPI-anchored Ephrin A proteins. PLoS Pathog. 2011 Oct;7(10):e1002309. doi: 10.1371/journal.ppat.1002309. Epub 2011 Oct 20. PubMed PMID: 22028653; PubMed Central PMCID: PMC3197615.
		van der Kuyl AC. Characterization of a full-length endogenous beta-retrovirus, EqERV-beta1, in the genome of the horse (Equus caballus). Viruses. 2011 Jun;3(6):620-8. doi: 10.3390/v3060620. Epub 2011 Jun 1. PubMed PMID: 21994749; PubMed Central PMCID: PMC3185775.
		Singh IR. Detecting retroviral sequences in chronic fatigue syndrome. Viruses. 2010 Nov;2(11):2404-8. doi: 10.3390/v2112404. Epub 2010 Nov 3. PubMed PMID: 21994623; PubMed Central PMCID: PMC3185580.
		Lee KH, Horiuchi M, Itoh T, Greenhalgh DG, Cho K. Cerebellum-specific and age-dependent expression of an endogenous retrovirus with intact coding potential. Retrovirology. 2011 Oct 12;82. doi: 10.1186/1742-4690-8-82. PubMed PMID: 21992658; PubMed Central PMCID: PMC3207890.
		Kihara M, Leroy V, Baudino L, Evans LH, Izui S. Sgp3 and Sgp4 control expression of distinct and restricted sets of xenotropic retroviruses encoding serum gp70 implicated in murine lupus nephritis. J Autoimmun. 2011 Dec;37(4):311-8. doi: 10.1016/j.jaut.2011.09.001. Epub 2011 Oct 7. PubMed PMID: 21982749; PubMed Central PMCID: PMC3254601.
		Maksakova IA, Goyal P, Bullwinkel J, Brown JP, Bilenky M, Mager DL, Singh PB, Lorincz MC. H3K9me3-binding proteins are dispensable for SETDB1/H3K9me3-dependent retroviral silencing. Epigenetics Chromatin. 2011 Jul 20;4(1):12. doi: 10.1186/1756-8935-4-12. PubMed PMID: 21774827; PubMed Central PMCID: PMC3169442.
		Lee YK, Chew A, Greenhalgh DG, Cho K. Tropism, cytotoxicity, and inflammatory properties of two envelope genes of murine leukemia virus type-endogenous retroviruses of C57BL/6J mice. Mediators Inflamm. 2011;509604. doi: 10.1155/2011/509604. Epub 2011 Jun 5. PubMed PMID: 21772664; PubMed Central PMCID: PMC3134291.
		Mendoza R, Vaughan AE, Miller AD. The left half of the XMRV retrovirus is present in an endogenous retrovirus of NIH/3T3 Swiss mouse cells. J Virol. 2011 Sep;85(17):9247-8. doi: 10.1128/JVI.05137-11. Epub 2011 Jun 22. PubMed PMID: 21697491; PubMed Central PMCID: PMC3165791.
		Paprotka T, Delviks-Frankenberry KA, Cing√∂z O, Martinez A, Kung HJ, Tepper CG, Hu WS, Fivash MJ Jr, Coffin JM, Pathak VK. Recombinant origin of the retrovirus XMRV. Science. 2011 Jul 1;333(6038):97-101. doi: 10.1126/science.1205292. Epub 2011 May 31. PubMed PMID: 21628392; PubMed Central PMCID: PMC3278917.
		Karimi MM, Goyal P, Maksakova IA, Bilenky M, Leung D, Tang JX, Shinkai Y, Mager DL, Jones S, Hirst M, Lorincz MC. DNA methylation and SETDB1/H3K9me3 regulate predominantly distinct sets of genes, retroelements, and chimeric transcripts in mESCs. Cell Stem Cell. 2011 Jun 3;8(6):676-87. doi: 10.1016/j.stem.2011.04.004. PubMed PMID: 21624812; PubMed Central PMCID: PMC3857791.
		Huang K, Fan G. Epigenetic modifications in distinction: histone versus DNA methylation in ESCs. Cell Stem Cell. 2011 Jun 3;8(6):604-5. doi: 10.1016/j.stem.2011.05.007. PubMed PMID: 21624801.
		Koshi K, Ushizawa K, Kizaki K, Takahashi T, Hashizume K. Expression of endogenous retrovirus-like transcripts in bovine trophoblastic cells. Placenta. 2011 Jul;32(7):493-9. doi: 10.1016/j.placenta.2011.04.002. Epub 2011 May 14. PubMed PMID: 21571366.
		Bae EH, Jung YT. Evaluation of the potential risk of porcine endogenous retrovirus (PERV) infection in nude mice. J Microbiol Biotechnol. 2011 Apr;21(4):387-90. PubMed PMID: 21532322.
		Renaudineau Y, Youinou P. Epigenetics and autoimmunity, with special emphasis on methylation. Keio J Med. 2011;60(1):10-6. Review. PubMed PMID: 21460598.
		Kraus B, Boller K, Reuter A, Schnierle BS. Characterization of the human endogenous retrovirus K Gag protein: identification of protease cleavage sites. Retrovirology. 2011 Mar 23;21. doi: 10.1186/1742-4690-8-21. PubMed PMID: 21429186; PubMed Central PMCID: PMC3073897.
		Leung DC, Dong KB, Maksakova IA, Goyal P, Appanah R, Lee S, Tachibana M, Shinkai Y, Lehnertz B, Mager DL, Rossi F, Lorincz MC. Lysine methyltransferase G9a is required for de novo DNA methylation and the establishment, but not the maintenance, of proviral silencing. Proc Natl Acad Sci U S A. 2011 Apr 5;108(14):5718-23. doi: 10.1073/pnas.1014660108. Epub 2011 Mar 22. PubMed PMID: 21427230; PubMed …
		Ikeda T, Abd El Galil KH, Tokunaga K, Maeda K, Sata T, Sakaguchi N, Heidmann T, Koito A. Intrinsic restriction activity by apolipoprotein B mRNA editing enzyme APOBEC1 against the mobility of autonomous retrotransposons. Nucleic Acids Res. 2011 Jul;39(13):5538-54. doi: 10.1093/nar/gkr124. Epub 2011 Mar 12. PubMed PMID: 21398638; PubMed Central PMCID: PMC3141244.
		Dupressoir A, Heidmann T. [Syncytins - retroviral envelope genes captured for the benefit of placental development]. Med Sci (Paris). 2011 Feb;27(2):163-9. doi: 10.1051/medsci/2011272163. Epub 2011 Mar 8. French. PubMed PMID: 21382324.
		Johal H, Ford C, Glenn W, Heads J, Lawson J, Rawlinson W. Mouse mammary tumor like virus sequences in breast milk from healthy lactating women. Breast Cancer Res Treat. 2011 Aug;129(1):149-55. doi: 10.1007/s10549-011-1421-6. Epub 2011 Mar 2. PubMed PMID: 21365265.
		Macfarlan TS, Gifford WD, Agarwal S, Driscoll S, Lettieri K, Wang J, Andrews SE, Franco L, Rosenfeld MG, Ren B, Pfaff SL. Endogenous retroviruses and neighboring genes are coordinately repressed by LSD1/KDM1A. Genes Dev. 2011 Mar 15;25(6):594-607. doi: 10.1101/gad.2008511. Epub 2011 Feb 28. PubMed PMID: 21357675; PubMed Central PMCID: PMC3059833.
		Rahm N, Yap M, Snoeck J, Zoete V, Mu√±oz M, Radespiel U, Zimmermann E, Michielin O, Stoye JP, Ciuffi A, Telenti A. Unique spectrum of activity of prosimian TRIM5alpha against exogenous and endogenous retroviruses. J Virol. 2011 May;85(9):4173-83. doi: 10.1128/JVI.00075-11. Epub 2011 Feb 23. PubMed PMID: 21345948; PubMed Central PMCID: PMC3126249.
		Punkosdy GA, Blain M, Glass DD, Lozano MM, O'Mara L, Dudley JP, Ahmed R, Shevach EM. Regulatory T-cell expansion during chronic viral infection is dependent on endogenous retroviral superantigens. Proc Natl Acad Sci U S A. 2011 Mar 1;108(9):3677-82. doi: 10.1073/pnas.1100213108. Epub 2011 Feb 14. PubMed PMID: 21321220; PubMed Central PMCID: PMC3048095.
		Hedges DJ, Belancio VP. Restless genomes humans as a model organism for understanding host-retrotransposable element dynamics. Adv Genet. 2011;219-62. doi: 10.1016/B978-0-12-380860-8.00006-9. Review. PubMed PMID: 21310298.
		Balaj L, Lessard R, Dai L, Cho YJ, Pomeroy SL, Breakefield XO, Skog J. Tumour microvesicles contain retrotransposon elements and amplified oncogene sequences. Nat Commun. 2011 Feb 1;180. doi: 10.1038/ncomms1180. PubMed PMID: 21285958; PubMed Central PMCID: PMC3040683.
		Sciamanna I, Vitullo P, Curatolo A, Spadafora C. A reverse transcriptase-dependent mechanism is essential for murine preimplantation development. Genes (Basel). 2011 May 18;2(2):360-73. doi: 10.3390/genes2020360. PubMed PMID: 24710196; PubMed Central PMCID: PMC3924816.
		Oakes B, Tai AK, Cing√∂z O, Henefield MH, Levine S, Coffin JM, Huber BT. Contamination of human DNA samples with mouse DNA can lead to false detection of XMRV-like sequences. Retrovirology. 2010 Dec 20;109. doi: 10.1186/1742-4690-7-109. PubMed PMID: 21171973; PubMed Central PMCID: PMC3022687.
		Mason AL. The evidence supports a viral aetiology for primary biliary cirrhosis. J Hepatol. 2011 Jun;54(6):1312-4. doi: 10.1016/j.jhep.2010.12.009. Epub 2010 Dec 13. PubMed PMID: 21147183.
		Selmi C. The evidence does not support a viral etiology for primary biliary cirrhosis. J Hepatol. 2011 Jun;54(6):1315-6. doi: 10.1016/j.jhep.2010.12.010. Epub 2010 Dec 10. PubMed PMID: 21146570.
		Legiewicz M, Zolotukhin AS, Pilkington GR, Purzycka KJ, Mitchell M, Uranishi H, Bear J, Pavlakis GN, Le Grice SF, Felber BK. The RNA transport element of the murine musD retrotransposon requires long-range intramolecular interactions for function. J Biol Chem. 2010 Dec 31;285(53):42097-104. doi: 10.1074/jbc.M110.182840. Epub 2010 Oct 26. PubMed PMID: 20978285; PubMed Central PMCID: PMC3009935.
		Kwon DN, Lee YK, Greenhalgh DG, Cho K. Lipopolysaccharide stress induces cell-type specific production of murine leukemia virus type-endogenous retroviral virions in primary lymphoid cells. J Gen Virol. 2011 Feb;92(Pt 2):292-300. doi: 10.1099/vir.0.023416-0. Epub 2010 Oct 21. PubMed PMID: 20965985; PubMed Central PMCID: PMC3081078.
		Park SH, Bae EH, Lee YJ, Lee KJ, Lim JH, Kim SR, Kwon EY, Jung YT. The rapid production of high-titer porcine endogenous retrovirus(PERV)-B env pseudotype and construction of an EGFP-expressing replication competent PERV-A vector. J Virol Methods. 2011 Jan;171(1):61-6. doi: 10.1016/j.jviromet.2010.09.030. Epub 2010 Oct 8. PubMed PMID: 20933542.
		Martin WJ. Possible widespread low-level occurrence of murine leukemia virus-related gene sequences in humans. Proc Natl Acad Sci U S A. 2010 Oct 26;107(43):E162; author reply E163-4. doi: 10.1073/pnas.1012930107. Epub 2010 Sep 30. PubMed PMID: 20884851; PubMed Central PMCID: PMC2972984.
		Baudino L, Changolkar LN, Pehrson JR, Izui S. The Sgp3 locus derived from the 129 strain is responsible for enhanced endogenous retroviral expression in macroH2A1-deficient mice. J Autoimmun. 2010 Dec;35(4):398-403. doi: 10.1016/j.jaut.2010.08.003. Epub 2010 Sep 15. PubMed PMID: 20833509; PubMed Central PMCID: PMC2980350.
		Panaro MA, Calvello R, Mitolo CI, Sisto M, Saccia M, Cianciulli A. An analysis of the human and mouse CXCR5 gene introns. Immunopharmacol Immunotoxicol. 2011 Jun;33(2):342-6. doi: 10.3109/08923973.2010.512012. Epub 2010 Sep 1. PubMed PMID: 20809769.
		Lo SC, Pripuzova N, Li B, Komaroff AL, Hung GC, Wang R, Alter HJ. Detection of MLV-related virus gene sequences in blood of patients with chronic fatigue syndrome and healthy blood donors. Proc Natl Acad Sci U S A. 2010 Sep 7;107(36):15874-9. doi: 10.1073/pnas.1006901107. Epub 2010 Aug 23. Erratum in: Proc Natl Acad Sci U S A. 2010 Nov 2;107(44):19132. Retraction in: Lo SC, Pripuzova N, Li B, Kom…
		Goffinet C, Schmidt S, Kern C, Oberbremer L, Keppler OT. Endogenous CD317/Tetherin limits replication of HIV-1 and murine leukemia virus in rodent cells and is resistant to antagonists from primate viruses. J Virol. 2010 Nov;84(21):11374-84. doi: 10.1128/JVI.01067-10. Epub 2010 Aug 11. PubMed PMID: 20702620; PubMed Central PMCID: PMC2953199.
		Antony JM, Deslauriers AM, Bhat RK, Ellestad KK, Power C. Human endogenous retroviruses and multiple sclerosis: innocent bystanders or disease determinants? Biochim Biophys Acta. 2011 Feb;1812(2):162-76. doi: 10.1016/j.bbadis.2010.07.016. Epub 2010 Aug 6. Review. PubMed PMID: 20696240.
		Baudino L, Yoshinobu K, Morito N, Santiago-Raber ML, Izui S. Role of endogenous retroviruses in murine SLE. Autoimmun Rev. 2010 Nov;10(1):27-34. doi: 10.1016/j.autrev.2010.07.012. Epub 2010 Jul 24. Review. PubMed PMID: 20659589.
		Rai T, Mosoian A, Resh MD. Annexin 2 is not required for human immunodeficiency virus type 1 particle production but plays a cell type-dependent role in regulating infectivity. J Virol. 2010 Oct;84(19):9783-92. doi: 10.1128/JVI.01584-09. Epub 2010 Jul 14. PubMed PMID: 20631122; PubMed Central PMCID: PMC2937750.
		Baudino L, Yoshinobu K, Dunand-Sauthier I, Evans LH, Izui S. TLR-mediated up-regulation of serum retroviral gp70 is controlled by the Sgp loci of lupus-prone mice. J Autoimmun. 2010 Sep;35(2):153-9. doi: 10.1016/j.jaut.2010.06.001. Epub 2010 Jul 8. PubMed PMID: 20619604; PubMed Central PMCID: PMC2926185.
		Pi W, Zhu X, Wu M, Wang Y, Fulzele S, Eroglu A, Ling J, Tuan D. Long-range function of an intergenic retrotransposon. Proc Natl Acad Sci U S A. 2010 Jul 20;107(29):12992-7. doi: 10.1073/pnas.1004139107. Epub 2010 Jul 6. PubMed PMID: 20615953; PubMed Central PMCID: PMC2919959.
		Chiu S, Hsu K, Greenhalgh DG, Cho K. Post-injury stress signals alter epigenetic profile of cytosine methylation in the proviral genome of endogenous retroviruses. Exp Mol Pathol. 2010 Dec;89(3):291-300. doi: 10.1016/j.yexmp.2010.06.012. Epub 2010 Jul 6. PubMed PMID: 20609362.
		Castellano E, Downward J. Role of RAS in the regulation of PI 3-kinase. Curr Top Microbiol Immunol. 2010;143-69. doi: 10.1007/82_2010_56. Review. PubMed PMID: 20563706.
		Golding MC, Zhang L, Mann MR. Multiple epigenetic modifiers induce aggressive viral extinction in extraembryonic endoderm stem cells. Cell Stem Cell. 2010 May 7;6(5):457-67. doi: 10.1016/j.stem.2010.03.014. PubMed PMID: 20452320.
		B√°nki Z, Posch W, Ejaz A, Oberhauser V, Willey S, Gassner C, Stoiber H, Dittmer U, Dierich MP, Hasenkrug KJ, Wilflingseder D. Complement as an endogenous adjuvant for dendritic cell-mediated induction of retrovirus-specific CTLs. PLoS Pathog. 2010 Apr 29;6(4):e1000891. doi: 10.1371/journal.ppat.1000891. PubMed PMID: 20442876; PubMed Central PMCID: PMC2861708.
		Miyazawa T. Endogenous retroviruses as potential hazards for vaccines. Biologicals. 2010 May;38(3):371-6. doi: 10.1016/j.biologicals.2010.03.003. Epub 2010 Apr 8. Review. PubMed PMID: 20378372.
		Ollinger R, Reichmann J, Adams IR. Meiosis and retrotransposon silencing during germ cell development in mice. Differentiation. 2010 Mar;79(3):147-58. doi: 10.1016/j.diff.2009.10.004. Review. PubMed PMID: 20227008.
		Miyazawa T. [Receptors for animal retroviruses]. Uirusu. 2009 Dec;59(2):223-42. Review. Japanese. PubMed PMID: 20218331.
		Matsui T, Leung D, Miyashita H, Maksakova IA, Miyachi H, Kimura H, Tachibana M, Lorincz MC, Shinkai Y. Proviral silencing in embryonic stem cells requires the histone methyltransferase ESET. Nature. 2010 Apr 8;464(7290):927-31. doi: 10.1038/nature08858. Epub 2010 Feb 17. Erratum in: Nature. 2014 Sep 4;513(7516):128. PubMed PMID: 20164836.
		Rowe HM, Jakobsson J, Mesnard D, Rougemont J, Reynard S, Aktas T, Maillard PV, Layard-Liesching H, Verp S, Marquis J, Spitz F, Constam DB, Trono D. KAP1 controls endogenous retroviruses in embryonic stem cells. Nature. 2010 Jan 14;463(7278):237-40. doi: 10.1038/nature08674. PubMed PMID: 20075919.
		van der Kuyl AC, Cornelissen M, Berkhout B. Of Mice and Men: On the Origin of XMRV. Front Microbiol. 2011 Jan 17;147. doi: 10.3389/fmicb.2010.00147. eCollection 2010. PubMed PMID: 21687768; PubMed Central PMCID: PMC3109487.
		Lee HJ, Park N, Cho HJ, Yoon JK, Van ND, Oh YK, Kim YB. Development of a novel viral DNA vaccine against human papillomavirus: AcHERV-HP16L1. Vaccine. 2010 Feb 10;28(6):1613-9. doi: 10.1016/j.vaccine.2009.11.044. Epub 2009 Dec 2. PubMed PMID: 19961961.
		Lin EH, Salon C, Brambilla E, Lavillette D, Szecsi J, Cosset FL, Coll JL. Fusogenic membrane glycoproteins induce syncytia formation and death in vitro and in vivo: a potential therapy agent for lung cancer. Cancer Gene Ther. 2010 Apr;17(4):256-65. doi: 10.1038/cgt.2009.74. Epub 2009 Nov 6. PubMed PMID: 19893593.
		Wang Y, Liska F, Gosele C, Sedov√° L, Kren V, Krenov√° D, Ivics Z, Hubner N, Izsv√°k Z. A novel active endogenous retrovirus family contributes to genome variability in rat inbred strains. Genome Res. 2010 Jan;20(1):19-27. doi: 10.1101/gr.100073.109. Epub 2009 Nov 3. PubMed PMID: 19887576; PubMed Central PMCID: PMC2798827.
		Santiago-Raber ML, Baudino L, Izui S. Emerging roles of TLR7 and TLR9 in murine SLE. J Autoimmun. 2009 Nov-Dec;33(3-4):231-8. doi: 10.1016/j.jaut.2009.10.001. Epub 2009 Oct 21. Review. PubMed PMID: 19846276.
		Lovsin N, Peterlin BM. APOBEC3 proteins inhibit LINE-1 retrotransposition in the absence of ORF1p binding. Ann N Y Acad Sci. 2009 Oct;268-75. doi: 10.1111/j.1749-6632.2009.05006.x. PubMed PMID: 19845642.
		Steinbiss S, Willhoeft U, Gremme G, Kurtz S. Fine-grained annotation and classification of de novo predicted LTR retrotransposons. Nucleic Acids Res. 2009 Nov;37(21):7002-13. doi: 10.1093/nar/gkp759. Epub . PubMed PMID: 19786494; PubMed Central PMCID: PMC2790888.
		Singh S, Kaye S, Gore ME, McClure MO, Bunker CB. The role of human endogenous retroviruses in melanoma. Br J Dermatol. 2009 Dec;161(6):1225-31. doi: 10.1111/j.1365-2133.2009.09415.x. Epub 2009 Jul 20. Review. Erratum in: Br J Dermatol. 2009 Dec;161(6):1424. PubMed PMID: 19785608.
		Hofacre A, Nitta T, Fan H. Jaagsiekte sheep retrovirus encodes a regulatory factor, Rej, required for synthesis of Gag protein. J Virol. 2009 Dec;83(23):12483-98. doi: 10.1128/JVI.01747-08. Epub 2009 Sep 23. PubMed PMID: 19776124; PubMed Central PMCID: PMC2786725.
		Mangeat B, Gers-Huber G, Lehmann M, Zufferey M, Luban J, Piguet V. HIV-1 Vpu neutralizes the antiviral factor Tetherin/BST-2 by binding it and directing its beta-TrCP2-dependent degradation. PLoS Pathog. 2009 Sep;5(9):e1000574. doi: 10.1371/journal.ppat.1000574. Epub 2009 Sep 4. PubMed PMID: 19730691; PubMed Central PMCID: PMC2729927.
		Langlois MA, Kemmerich K, Rada C, Neuberger MS. The AKV murine leukemia virus is restricted and hypermutated by mouse APOBEC3. J Virol. 2009 Nov;83(22):11550-9. doi: 10.1128/JVI.01430-09. Epub 2009 Sep 2. PubMed PMID: 19726503; PubMed Central PMCID: PMC2772689.
		Yang WC, Patel KG, Lee J, Ghebremariam YT, Wong HE, Cooke JP, Swartz JR. Cell-free production of transducible transcription factors for nuclear reprogramming. Biotechnol Bioeng. 2009 Dec 15;104(6):1047-58. doi: 10.1002/bit.22517. PubMed PMID: 19718703; PubMed Central PMCID: PMC3142170.
		Stoye JP. Proviral protein provides placental function. Proc Natl Acad Sci U S A. 2009 Jul 21;106(29):11827-8. doi: 10.1073/pnas.0906295106. Epub 2009 Jul 15. PubMed PMID: 19617545; PubMed Central PMCID: PMC2715491.
		Benachenhou F, Blikstad V, Blomberg J. The phylogeny of orthoretroviral long terminal repeats (LTRs). Gene. 2009 Dec 15;448(2):134-8. doi: 10.1016/j.gene.2009.07.002. Epub 2009 Jul 9. PubMed PMID: 19595747.
		Dupressoir A, Vernochet C, Bawa O, Harper F, Pierron G, Opolon P, Heidmann T. Syncytin-A knockout mice demonstrate the critical role in placentation of a fusogenic, endogenous retrovirus-derived, envelope gene. Proc Natl Acad Sci U S A. 2009 Jul 21;106(29):12127-32. doi: 10.1073/pnas.0902925106. Epub 2009 Jun 29. PubMed PMID: 19564597; PubMed Central PMCID: PMC2715540.
		Yoshinobu K, Baudino L, Santiago-Raber ML, Morito N, Dunand-Sauthier I, Morley BJ, Evans LH, Izui S. Selective up-regulation of intact, but not defective env RNAs of endogenous modified polytropic retrovirus by the Sgp3 locus of lupus-prone mice. J Immunol. 2009 Jun 15;182(12):8094-103. doi: 10.4049/jimmunol.0900263. PubMed PMID: 19494335; PubMed Central PMCID: PMC2792900.
		Benachenhou F, Jern P, Oja M, Sperber G, Blikstad V, Somervuo P, Kaski S, Blomberg J. Evolutionary conservation of orthoretroviral long terminal repeats (LTRs) and ab initio detection of single LTRs in genomic data. PLoS One. 2009;4(4):e5179. doi: 10.1371/journal.pone.0005179. Epub 2009 Apr 13. PubMed PMID: 19365549; PubMed Central PMCID: PMC2664473.
		Ruggieri A, Maldener E, Sauter M, Mueller-Lantzsch N, Meese E, Fackler OT, Mayer J. Human endogenous retrovirus HERV-K(HML-2) encodes a stable signal peptide with biological properties distinct from Rec. Retrovirology. 2009 Feb 16;17. doi: 10.1186/1742-4690-6-17. PubMed PMID: 19220907; PubMed Central PMCID: PMC2649029.
		Mertz JA, Lozano MM, Dudley JP. Rev and Rex proteins of human complex retroviruses function with the MMTV Rem-responsive element. Retrovirology. 2009 Feb 3;10. doi: 10.1186/1742-4690-6-10. PubMed PMID: 19192308; PubMed Central PMCID: PMC2661877.
		Geuking MB, Weber J, Dewannieux M, Gorelik E, Heidmann T, Hengartner H, Zinkernagel RM, Hangartner L. Recombination of retrotransposon and exogenous RNA virus results in nonretroviral cDNA integration. Science. 2009 Jan 16;323(5912):393-6. doi: 10.1126/science.1167375. PubMed PMID: 19150848.
		Yu P, Zhang L, Li SF, Cheng JQ, Lu YR, Li YP, Bu H. Transmission of porcine endogenous retrovirus to human cells in nude mouse. Acta Virol. 2008;52(4):257-60. PubMed PMID: 19143483.
		Evans LH, Alamgir AS, Owens N, Weber N, Virtaneva K, Barbian K, Babar A, Malik F, Rosenke K. Mobilization of endogenous retroviruses in mice after infection with an exogenous retrovirus. J Virol. 2009 Mar;83(6):2429-35. doi: 10.1128/JVI.01926-08. Epub 2008 Dec 30. PubMed PMID: 19116259; PubMed Central PMCID: PMC2648265.
		Gifford RJ, Katzourakis A, Tristem M, Pybus OG, Winters M, Shafer RW. A transitional endogenous lentivirus from the genome of a basal primate and implications for lentivirus evolution. Proc Natl Acad Sci U S A. 2008 Dec 23;105(51):20362-7. doi: 10.1073/pnas.0807873105. Epub 2008 Dec 15. PubMed PMID: 19075221; PubMed Central PMCID: PMC2603253.
		Hsiao FC, Tai AK, Deglon A, Sutkowski N, Longnecker R, Huber BT. EBV LMP-2A employs a novel mechanism to transactivate the HERV-K18 superantigen through its ITAM. Virology. 2009 Mar 1;385(1):261-6. doi: 10.1016/j.virol.2008.11.025. Epub 2008 Dec 12. PubMed PMID: 19070345.
		Cho K, Chiu S, Lee YK, Greenhalgh D, Nemzek J. Experimental polymicrobial peritonitis-associated transcriptional regulation of murine endogenous retroviruses. Shock. 2009 Aug;32(2):147-58. doi: 10.1097/SHK.0b013e31819721ae. PubMed PMID: 19060780.
		Kim BH, Meeker HC, Shin HY, Kim JI, Jeong BH, Choi EK, Carp RI, Kim YS. Physiological properties of astroglial cell lines derived from mice with high (SAMP8) and low (SAMR1, ICR) levels of endogenous retrovirus. Retrovirology. 2008 Nov 25;104. doi: 10.1186/1742-4690-5-104. PubMed PMID: 19032740; PubMed Central PMCID: PMC2607306.
		Ishida T, Obata Y, Ohara N, Matsushita H, Sato S, Uenaka A, Saika T, Miyamura T, Chayama K, Nakamura Y, Wada H, Yamashita T, Morishima T, Old LJ, Nakayama E. Identification of the HERV-K gag antigen in prostate cancer by SEREX using autologous patient serum and its immunogenicity. Cancer Immun. 2008 Nov 13;15. PubMed PMID: 19006261; PubMed Central PMCID: PMC2935773.
		Esnault C, Priet S, Ribet D, Vernochet C, Bruls T, Lavialle C, Weissenbach J, Heidmann T. A placenta-specific receptor for the fusogenic, endogenous retrovirus-derived, human syncytin-2. Proc Natl Acad Sci U S A. 2008 Nov 11;105(45):17532-7. doi: 10.1073/pnas.0807413105. Epub 2008 Nov 6. PubMed PMID: 18988732; PubMed Central PMCID: PMC2582322.
		Kwon DN, Greenhalgh DG, Cho K. Cloning and characterization of endogenous retroviruses associated with postinjury stress signals in lymphoid tissues. Shock. 2009 Jul;32(1):80-8. doi: 10.1097/SHK.0b013e31818bc193. PubMed PMID: 18948849.
		Perez-Caballero D, Soll SJ, Bieniasz PD. Evidence for restriction of ancient primate gammaretroviruses by APOBEC3 but not TRIM5alpha proteins. PLoS Pathog. 2008 Oct;4(10):e1000181. doi: 10.1371/journal.ppat.1000181. Epub 2008 Oct 17. PubMed PMID: 18927623; PubMed Central PMCID: PMC2564838.
		Maksakova IA, Mager DL, Reiss D. Keeping active endogenous retroviral-like elements in check: the epigenetic perspective. Cell Mol Life Sci. 2008 Nov;65(21):3329-47. doi: 10.1007/s00018-008-8494-3. Review. PubMed PMID: 18818875.
		Stocking C, Kozak CA. Murine endogenous retroviruses. Cell Mol Life Sci. 2008 Nov;65(21):3383-98. doi: 10.1007/s00018-008-8497-0. Review. PubMed PMID: 18818872.
		Ollinger R, Childs AJ, Burgess HM, Speed RM, Lundegaard PR, Reynolds N, Gray NK, Cooke HJ, Adams IR. Deletion of the pluripotency-associated Tex19.1 gene causes activation of endogenous retroviruses and defective spermatogenesis in mice. PLoS Genet. 2008 Sep 19;4(9):e1000199. doi: 10.1371/journal.pgen.1000199. PubMed PMID: 18802469; PubMed Central PMCID: PMC2531233.
		Esnault C, Priet S, Ribet D, Heidmann O, Heidmann T. Restriction by APOBEC3 proteins of endogenous retroviruses with an extracellular life cycle: ex vivo effects and in vivo "traces" on the murine IAPE and human HERV-K elements. Retrovirology. 2008 Aug 14;75. doi: 10.1186/1742-4690-5-75. PubMed PMID: 18702815; PubMed Central PMCID: PMC2531183.
		Baudino L, Yoshinobu K, Morito N, Kikuchi S, Fossati-Jimack L, Morley BJ, Vyse TJ, Hirose S, J√∏rgensen TN, Tucker RM, Roark CL, Kotzin BL, Evans LH, Izui S. Dissection of genetic mechanisms governing the expression of serum retroviral gp70 implicated in murine lupus nephritis. J Immunol. 2008 Aug 15;181(4):2846-54. PubMed PMID: 18684976; PubMed Central PMCID: PMC2587122.
		Seidler B, Schmidt A, Mayr U, Nakhai H, Schmid RM, Schneider G, Saur D. A Cre-loxP-based mouse model for conditional somatic gene expression and knockdown in vivo by using avian retroviral vectors. Proc Natl Acad Sci U S A. 2008 Jul 22;105(29):10137-42. doi: 10.1073/pnas.0800487105. Epub 2008 Jul 11. PubMed PMID: 18621715; PubMed Central PMCID: PMC2481330.
		Kim JB, Zaehres H, Wu G, Gentile L, Ko K, Sebastiano V, Ara√∫zo-Bravo MJ, Ruau D, Han DW, Zenke M, Sch√∂ler HR. Pluripotent stem cells induced from adult neural stem cells by reprogramming with two factors. Nature. 2008 Jul 31;454(7204):646-50. doi: 10.1038/nature07061. Epub 2008 Jun 29. PubMed PMID: 18594515.
		Miller AD, Bergholz U, Ziegler M, Stocking C. Identification of the myelin protein plasmolipin as the cell entry receptor for Mus caroli endogenous retrovirus. J Virol. 2008 Jul;82(14):6862-8. doi: 10.1128/JVI.00397-08. Epub 2008 May 7. PubMed PMID: 18463156; PubMed Central PMCID: PMC2446966.
		Zhang Y, Maksakova IA, Gagnier L, van de Lagemaat LN, Mager DL. Genome-wide assessments reveal extremely high levels of polymorphism of two active families of mouse endogenous retroviral elements. PLoS Genet. 2008 Feb 29;4(2):e1000007. doi: 10.1371/journal.pgen.1000007. PubMed PMID: 18454193; PubMed Central PMCID: PMC2265474.
		Hodes RJ, Abe R. Mouse endogenous superantigens: Ms and Mls-like determinants encoded by mouse retroviruses. Curr Protoc Immunol. 2001 May;Appendix Appendix 1F. doi: 10.1002/0471142735.ima01fs17. PubMed PMID: 18432642.
		Marcucci KT, Martina Y, Harrison F, Wilson CA, Salomon DR. Functional hierarchy of two L domains in porcine endogenous retrovirus (PERV) that influence release and infectivity. Virology. 2008 Jun 5;375(2):637-45. doi: 10.1016/j.virol.2008.02.017. Epub 2008 Mar 19. PubMed PMID: 18355887; PubMed Central PMCID: PMC2626135.
		Kwon DN, Nguyen S, Chew A, Hsu K, Greenhalgh D, Cho K. Identification of putative endogenous retroviruses actively transcribed in the brain. Virus Genes. 2008 Jun;36(3):439-47. doi: 10.1007/s11262-008-0216-2. Epub 2008 Mar 15. PubMed PMID: 18343986.
		Simmons WM, Navratilova Z, Foster S, Roden D, Boller K, Murray PG, Nelson PN. Optimal seeding concentrations of hybridomas and other novel strategies to enhance antibody yield. Hum Antibodies. 2007;16(3-4):159-62. PubMed PMID: 18334750.
		Takahashi Y, Tanaka R, Yamamoto N, Tanaka Y. Enhancement of OX40-induced apoptosis by TNF coactivation in OX40-expressing T cell lines in vitro leading to decreased targets for HIV type 1 production. AIDS Res Hum Retroviruses. 2008 Mar;24(3):423-35. doi: 10.1089/aid.2007.0092. PubMed PMID: 18327975.
		Cho K, Lee YK, Greenhalgh DG. Endogenous retroviruses in systemic response to stress signals. Shock. 2008 Aug;30(2):105-16. doi: 10.1097/SHK.0b013e31816a363f. Review. PubMed PMID: 18317406.
		Chiu YL, Greene WC. The APOBEC3 cytidine deaminases: an innate defensive network opposing exogenous retroviruses and endogenous retroelements. Annu Rev Immunol. 2008;317-53. doi: 10.1146/annurev.immunol.26.021607.090350. Review. PubMed PMID: 18304004.
		Ribet D, Harper F, Esnault C, Pierron G, Heidmann T. The GLN family of murine endogenous retroviruses contains an element competent for infectious viral particle formation. J Virol. 2008 May;82(9):4413-9. doi: 10.1128/JVI.02141-07. Epub 2008 Feb 20. PubMed PMID: 18287236; PubMed Central PMCID: PMC2293071.
		Ribet D, Harper F, Dupressoir A, Dewannieux M, Pierron G, Heidmann T. An infectious progenitor for the murine IAP retrotransposon: emergence of an intracellular genetic parasite from an ancient retrovirus. Genome Res. 2008 Apr;18(4):597-609. doi: 10.1101/gr.073486.107. Epub 2008 Feb 6. PubMed PMID: 18256233; PubMed Central PMCID: PMC2279247.
		Uchil PD, Quinlan BD, Chan WT, Luna JM, Mothes W. TRIM E3 ligases interfere with early and late stages of the retroviral life cycle. PLoS Pathog. 2008 Feb 8;4(2):e16. doi: 10.1371/journal.ppat.0040016. PubMed PMID: 18248090; PubMed Central PMCID: PMC2222954.
		Wenner M. Virology: the battle within. Nature. 2008 Jan 24;451(7177):388-9. doi: 10.1038/451388a. PubMed PMID: 18216825.
		Changolkar LN, Singh G, Pehrson JR. macroH2A1-dependent silencing of endogenous murine leukemia viruses. Mol Cell Biol. 2008 Mar;28(6):2059-65. doi: 10.1128/MCB.01362-07. Epub 2008 Jan 14. PubMed PMID: 18195046; PubMed Central PMCID: PMC2268408.
		Lee YK, Chew A, Phan H, Greenhalgh DG, Cho K. Genome-wide expression profiles of endogenous retroviruses in lymphoid tissues and their biological properties. Virology. 2008 Apr 10;373(2):263-73. doi: 10.1016/j.virol.2007.10.043. Epub 2008 Jan 9. PubMed PMID: 18187179; PubMed Central PMCID: PMC2427371.
		Zhang F, Da R, Song W, Chen X, Zhang X, Li X, Gu H. Pathogenic risk of endogenous retrovirus infection in immunodeficient hosts. Virus Res. 2008 Mar;132(1-2):237-41. doi: 10.1016/j.virusres.2007.11.015. PubMed PMID: 18178281.
		Mattiuzzo G, Matouskova M, Takeuchi Y. Differential resistance to cell entry by porcine endogenous retrovirus subgroup A in rodent species. Retrovirology. 2007 Dec 14;93. PubMed PMID: 18081925; PubMed Central PMCID: PMC2241639.
		Frank O, Verbeke C, Schwarz N, Mayer J, Fabarius A, Hehlmann R, Leib-M√∂sch C, Seifarth W. Variable transcriptional activity of endogenous retroviruses in human breast cancer. J Virol. 2008 Feb;82(4):1808-18. Epub 2007 Dec 12. PubMed PMID: 18077721; PubMed Central PMCID: PMC2258715.
		Mangeney M, Renard M, Schlecht-Louf G, Bouallaga I, Heidmann O, Letzelter C, Richaud A, Ducos B, Heidmann T. Placental syncytins: Genetic disjunction between the fusogenic and immunosuppressive activity of retroviral envelope proteins. Proc Natl Acad Sci U S A. 2007 Dec 18;104(51):20534-9. Epub 2007 Dec 12. PubMed PMID: 18077339; PubMed Central PMCID: PMC2154466.
		Perincheri S, Peyton DK, Glenn M, Peterson ML, Spear BT. Characterization of the ETnII-alpha endogenous retroviral element in the BALB/cJ Zhx2 ( Afr1 ) allele. Mamm Genome. 2008 Jan;19(1):26-31. Epub 2007 Dec 8. PubMed PMID: 18066620.
		Hayashida K, Omagari K, Masuda J, Kohno S. An integrase of endogenous retrovirus is involved in maternal mitochondrial DNA inheritance of the mouse. Biochem Biophys Res Commun. 2008 Feb 1;366(1):206-11. Epub 2007 Dec 3. PubMed PMID: 18054325.
		Ribet D, Louvet-Vall√©e S, Harper F, de Parseval N, Dewannieux M, Heidmann O, Pierron G, Maro B, Heidmann T. Murine endogenous retrovirus MuERV-L is the progenitor of the "orphan" epsilon viruslike particles of the early mouse embryo. J Virol. 2008 Feb;82(3):1622-5. Epub 2007 Nov 28. PubMed PMID: 18045933; PubMed Central PMCID: PMC2224431.
		Lee YK, Chew A, Fitzsimon L, Thomas R, Greenhalgh D, Cho K. Genome-wide changes in expression profile of murine endogenous retroviruses (MuERVs) in distant organs after burn injury. BMC Genomics. 2007 Nov 28;440. PubMed PMID: 18045489; PubMed Central PMCID: PMC2241634.
		Cho K, Hsu K, Kwon DN, Green T, Lim D, Lee YK, Greenhalgh DG. Cosegregation of CD14 locus and polymorphic alleles of glucocorticoid receptor and protocadherins into CD14 knockout mouse genome. Shock. 2008 Jun;29(6):724-32. PubMed PMID: 18004229.
		Arnaud F, Caporale M, Varela M, Biek R, Chessa B, Alberti A, Golder M, Mura M, Zhang YP, Yu L, Pereira F, Demartini JC, Leymaster K, Spencer TE, Palmarini M. A paradigm for virus-host coevolution: sequential counter-adaptations between endogenous and exogenous retroviruses. PLoS Pathog. 2007 Nov;3(11):e170. PubMed PMID: 17997604; PubMed Central PMCID: PMC2065879.
		L√∂tscher M, Recher M, Lang KS, Navarini A, Hunziker L, Santimaria R, Glatzel M, Schwarz P, B√∂ni J, Zinkernagel RM. Induced prion protein controls immune-activated retroviruses in the mouse spleen. PLoS One. 2007 Nov 7;2(11):e1158. PubMed PMID: 17987132; PubMed Central PMCID: PMC2063463.
		Jern P, Stoye JP, Coffin JM. Role of APOBEC3 in genetic diversity among endogenous murine leukemia viruses. PLoS Genet. 2007 Oct;3(10):2014-22. Epub 2007 Sep 10. PubMed PMID: 17967065; PubMed Central PMCID: PMC2041998.
		Ellis PJ, Ferguson L, Clemente EJ, Affara NA. Bidirectional transcription of a novel chimeric gene mapping to mouse chromosome Yq. BMC Evol Biol. 2007 Sep 24;171. PubMed PMID: 17892569; PubMed Central PMCID: PMC2212661.
		Huh JW, Cho BW, Kim DS, Ha HS, Noh YN, Yi JM, Lee WH, Kim HS. Long terminal repeats of porcine endogenous retroviruses in Sus scrofa. Arch Virol. 2007;152(12):2271-6. Epub 2007 Sep 7. PubMed PMID: 17823769.
		Mol√®s JP, Tesniere A, Guilhou JJ. Reverse transcriptase activity in human normal and psoriatic skin samples. Br J Dermatol. 2007 Sep;157(3):482-6. Epub 2007 Jul 5. PubMed PMID: 17614977.
		Langat DK, Wango EO, Owiti GO, Omollo EO, Mwenda JM. Characterisation of retroviral-related antigens expressed in normal baboon placental tissues. Afr J Health Sci. 1998 Jul-Dec;5(3-4):144-52. PubMed PMID: 17581017.
		Crowell RC, Kiessling AA. Endogenous retrovirus expression in testis and epididymis. Biochem Soc Trans. 2007 Jun;35(Pt 3):629-33. PubMed PMID: 17511667.
		Peaston AE, Knowles BB, Hutchison KW. Genome plasticity in the mouse oocyte and early embryo. Biochem Soc Trans. 2007 Jun;35(Pt 3):618-22. PubMed PMID: 17511664.
		Gentles AJ, Wakefield MJ, Kohany O, Gu W, Batzer MA, Pollock DD, Jurka J. Evolutionary dynamics of transposable elements in the short-tailed opossum Monodelphis domestica. Genome Res. 2007 Jul;17(7):992-1004. Epub 2007 May 10. PubMed PMID: 17495012; PubMed Central PMCID: PMC1899126.
		Siapati EK, Bigger BW, Kashofer K, Themis M, Thrasher AJ, Bonnet D. Murine leukemia following irradiation conditioning for transplantation of lentivirally-modified hematopoietic stem cells. Eur J Haematol. 2007 Apr;78(4):303-13. PubMed PMID: 17378892.
		McGee-Estrada K, Fan H. Comparison of LTR enhancer elements in sheep beta retroviruses: insights into the basis for tissue-specific expression. Virus Genes. 2007 Oct;35(2):303-12. Epub 2007 Feb 1. PubMed PMID: 17268841.
		Oricchio E, Sciamanna I, Beraldi R, Tolstonog GV, Schumann GG, Spadafora C. Distinct roles for LINE-1 and HERV-K retroelements in cell proliferation, differentiation and tumor progression. Oncogene. 2007 Jun 21;26(29):4226-33. Epub 2007 Jan 22. PubMed PMID: 17237820.
		Popp SK, Mann DA, Milburn PJ, Gibbs AJ, McCullagh PJ, Wilson JD, T√∂njes RR, Simeonovic CJ. Transient transmission of porcine endogenous retrovirus to fetal lambs after pig islet tissue xenotransplantation. Immunol Cell Biol. 2007 Apr-May;85(3):238-48. Epub 2007 Jan 16. PubMed PMID: 17228325.
		Ribet D, Harper F, Dewannieux M, Pierron G, Heidmann T. Murine MusD retrotransposon: structure and molecular evolution of an "intracellularized" retrovirus. J Virol. 2007 Feb;81(4):1888-98. Epub 2006 Dec 6. PubMed PMID: 17151128; PubMed Central PMCID: PMC1797557.
		Howard TM, Sheng Z, Wang M, Wu Y, Rasheed S. Molecular and phylogenetic analyses of a new amphotropic murine leukemia virus (MuLV-1313). Virol J. 2006 Dec 5;101. PubMed PMID: 17147829; PubMed Central PMCID: PMC1769482.
		Bhadra S, Lozano MM, Payne SM, Dudley JP. Endogenous MMTV proviruses induce susceptibility to both viral and bacterial pathogens. PLoS Pathog. 2006 Dec;2(12):e128. PubMed PMID: 17140288; PubMed Central PMCID: PMC1665650.
		Ohori Y, Yamamoto S, Nagao M, Sugimori M, Yamamoto N, Nakamura K, Nakafuku M. Growth factor treatment and genetic manipulation stimulate neurogenesis and oligodendrogenesis by endogenous neural progenitors in the injured adult spinal cord. J Neurosci. 2006 Nov 15;26(46):11948-60. PubMed PMID: 17108169.
		Ram√≠rez MA, Pericuesta E, Fernandez-Gonzalez R, Moreira P, Pintado B, Gutierrez-Adan A. Transcriptional and post-transcriptional regulation of retrotransposons IAP and MuERV-L affect pluripotency of mice ES cells. Reprod Biol Endocrinol. 2006 Nov 8;55. PubMed PMID: 17090336; PubMed Central PMCID: PMC1636644.
		Sekigawa I, Kawasaki M, Ogasawara H, Kaneda K, Kaneko H, Takasaki Y, Ogawa H. DNA methylation: its contribution to systemic lupus erythematosus. Clin Exp Med. 2006 Oct;6(3):99-106. Review. PubMed PMID: 17061057.
		Zeilfelder U, Frank O, Sparacio S, Sch√∂n U, Bosch V, Seifarth W, Leib-M√∂sch C. The potential of retroviral vectors to cotransfer human endogenous retroviruses (HERVs) from human packaging cell lines. Gene. 2007 Apr 1;390(1-2):175-9. Epub 2006 Sep 3. PubMed PMID: 17045761.
		Weiss RA. The discovery of endogenous retroviruses. Retrovirology. 2006 Oct 3;67. Review. PubMed PMID: 17018135; PubMed Central PMCID: PMC1617120.
		Zimmermann B. Detection of retroviruses in a calvaria of a young mouse. Ann Anat. 2006 Sep;188(5):415-9. PubMed PMID: 16999203.
		Reiss D, Mager DL. Stochastic epigenetic silencing of retrotransposons: does stability come with age? Gene. 2007 Apr 1;390(1-2):130-5. Epub 2006 Aug 18. Review. PubMed PMID: 16987613.
		Dunlap KA, Palmarini M, Varela M, Burghardt RC, Hayashi K, Farmer JL, Spencer TE. Endogenous retroviruses regulate periimplantation placental growth and differentiation. Proc Natl Acad Sci U S A. 2006 Sep 26;103(39):14390-5. Epub 2006 Sep 15. PubMed PMID: 16980413; PubMed Central PMCID: PMC1599973.
		Matsui T, Kinoshita-Ida Y, Hayashi-Kisumi F, Hata M, Matsubara K, Chiba M, Katahira-Tayama S, Morita K, Miyachi Y, Tsukita S. Mouse homologue of skin-specific retroviral-like aspartic protease involved in wrinkle formation. J Biol Chem. 2006 Sep 15;281(37):27512-25. Epub 2006 Jul 12. PubMed PMID: 16837463.
		Rolland A, Jouvin-Marche E, Viret C, Faure M, Perron H, Marche PN. The envelope protein of a human endogenous retrovirus-W family activates innate immunity through CD14/TLR4 and promotes Th1-like responses. J Immunol. 2006 Jun 15;176(12):7636-44. PubMed PMID: 16751411.
		Lee ST, Chu K, Kim EH, Jung KH, Lee KB, Sinn DI, Kim SU, Kim M, Roh JK. Quantification of human neural stem cell engraftments in rat brains using ERV-3 real-time PCR. J Neurosci Methods. 2006 Oct 30;157(2):225-9. Epub 2006 Jun 2. PubMed PMID: 16735065.
		Costain WJ, Rasquinha I, Graber T, Luebbert C, Preston E, Slinn J, Xie X, MacManus JP. Cerebral ischemia induces neuronal expression of novel VL30 mouse retrotransposons bound to polyribosomes. Brain Res. 2006 Jun 13;1094(1):24-37. Epub 2006 May 30. PubMed PMID: 16730676.
		B√ºscher K, Hahn S, Hofmann M, Trefzer U, Ozel M, Sterry W, L√∂wer J, L√∂wer R, Kurth R, Denner J. Expression of the human endogenous retrovirus-K transmembrane envelope, Rec and Np9 proteins in melanomas and melanoma cell lines. Melanoma Res. 2006 Jun;16(3):223-34. PubMed PMID: 16718269.
		Muradrasoli S, Forsman A, Hu L, Blikstad V, Blomberg J. Development of real-time PCRs for detection and quantitation of human MMTV-like (HML) sequences HML expression in human tissues. J Virol Methods. 2006 Sep;136(1-2):83-92. Epub 2006 May 19. PubMed PMID: 16713632.
		Pothlichet J, Mangeney M, Heidmann T. Mobility and integration sites of a murine C57BL/6 melanoma endogenous retrovirus involved in tumor progression in vivo. Int J Cancer. 2006 Oct 15;119(8):1869-77. PubMed PMID: 16708391.
		Evans LH, Lavignon M, Peterson K, Hasenkrug K, Robertson S, Malik F, Virtaneva K. In vivo interactions of ecotropic and polytropic murine leukemia viruses in mixed retrovirus infections. J Virol. 2006 May;80(10):4748-57. PubMed PMID: 16641268; PubMed Central PMCID: PMC1472087.
		Huh JW, Kim TH, Yi JM, Park ES, Kim WY, Sin HS, Kim DS, Min DS, Kim SS, Kim CB, Hyun BH, Kang SK, Jung JS, Lee WH, Takenaka O, Kim HS. Molecular evolution of the periphilin gene in relation to human endogenous retrovirus m element. J Mol Evol. 2006 Jun;62(6):730-7. Epub 2006 Apr 11. PubMed PMID: 16612547.
		Stengel A, Bach C, Vorberg I, Frank O, Gilch S, Lutzny G, Seifarth W, Erfle V, Maas E, Sch√§tzl H, Leib-M√∂sch C, Greenwood AD. Prion infection influences murine endogenous retrovirus expression in neuronal cells. Biochem Biophys Res Commun. 2006 May 12;343(3):825-31. Epub 2006 Mar 15. PubMed PMID: 16564028.
		Pothlichet J, Heidmann T, Mangeney M. A recombinant endogenous retrovirus amplified in a mouse neuroblastoma is involved in tumor growth in vivo. Int J Cancer. 2006 Aug 15;119(4):815-22. PubMed PMID: 16550601.
		Esnault C, Millet J, Schwartz O, Heidmann T. Dual inhibitory effects of APOBEC family proteins on retrotransposition of mammalian endogenous retroviruses. Nucleic Acids Res. 2006 Mar 14;34(5):1522-31. Print 2006. PubMed PMID: 16537839; PubMed Central PMCID: PMC1401513.
		Martina Y, Marcucci KT, Cherqui S, Szabo A, Drysdale T, Srinivisan U, Wilson CA, Patience C, Salomon DR. Mice transgenic for a human porcine endogenous retrovirus receptor are susceptible to productive viral infection. J Virol. 2006 Apr;80(7):3135-46. Erratum in: J Virol. 2006 May;80(10):5100. PubMed PMID: 16537582; PubMed Central PMCID: PMC1440412.
		Jang JE, Shaw K, Yu XJ, Petersen D, Pepper K, Lutzko C, Kohn DB. Specific and stable gene transfer to human embryonic stem cells using pseudotyped lentiviral vectors. Stem Cells Dev. 2006 Feb;15(1):109-17. PubMed PMID: 16522168.
		Oliveira NM, Farrell KB, Eiden MV. In vitro characterization of a koala retrovirus. J Virol. 2006 Mar;80(6):3104-7. PubMed PMID: 16501122; PubMed Central PMCID: PMC1395464.
		MacDearmid CC, Case LK, Starling CL, Golovkina TV. Gradual elimination of retroviruses in YBR/Ei mice. J Virol. 2006 Mar;80(5):2206-15. PubMed PMID: 16474128; PubMed Central PMCID: PMC1395389.
		Pakhomov O, Martignat L, Honiger J, Cl√©menceau B, Sa√Ø P, Darquy S. AN69 hollow fiber membrane will reduce but not abolish the risk of transmission of porcine endogenous retroviruses. Cell Transplant. 2005;14(10):749-56. PubMed PMID: 16454349.
		Maksakova IA, Romanish MT, Gagnier L, Dunn CA, van de Lagemaat LN, Mager DL. Retroviral elements and their hosts: insertional mutagenesis in the mouse germ line. PLoS Genet. 2006 Jan;2(1):e2. PubMed PMID: 16440055; PubMed Central PMCID: PMC1331978.
		Liu QC, Li XY, Wei BX, Zeng YX. [NP9 gene inhibits tumorigenicity of nasopharyngeal carcinoma]. Zhonghua Zhong Liu Za Zhi. 2005 Nov;27(11):641-4. Chinese. PubMed PMID: 16438881.
		Beraldi R, Pittoggi C, Sciamanna I, Mattei E, Spadafora C. Expression of LINE-1 retroposons is essential for murine preimplantation development. Mol Reprod Dev. 2006 Mar;73(3):279-87. PubMed PMID: 16365895.
		Gemeniano M, Mpanju O, Salomon DR, Eiden MV, Wilson CA. The infectivity and host range of the ecotropic porcine endogenous retrovirus, PERV-C, is modulated by residues in the C-terminal region of its surface envelope protein. Virology. 2006 Mar 1;346(1):108-17. Epub 2005 Nov 23. PubMed PMID: 16309725.
		Maksakova IA, Mager DL. Transcriptional regulation of early transposon elements, an active family of mouse long terminal repeat retrotransposons. J Virol. 2005 Nov;79(22):13865-74. PubMed PMID: 16254322; PubMed Central PMCID: PMC1280189.
		Schmidt P, Forsman A, Andersson G, Blomberg J, Korsgren O. Pig islet xenotransplantation: activation of porcine endogenous retrovirus in the immediate post-transplantation period. Xenotransplantation. 2005 Nov;12(6):450-6. PubMed PMID: 16202068.
		Barr SD, Leipzig J, Shinn P, Ecker JR, Bushman FD. Integration targeting by avian sarcoma-leukosis virus and human immunodeficiency virus in the chicken genome. J Virol. 2005 Sep;79(18):12035-44. PubMed PMID: 16140779; PubMed Central PMCID: PMC1212630.
		Kagohashi Y, Udagawa J, Moriyama K, Otani H. Maternal environment affects endogenous virus induction in the offspring of type 1 diabetes model non-obese diabetic mice. Congenit Anom (Kyoto). 2005 Sep;45(3):80-4. PubMed PMID: 16131364.
		Dunn CA, van de Lagemaat LN, Baillie GJ, Mager DL. Endogenous retrovirus long terminal repeats as ready-to-use mobile promoters: the case of primate beta3GAL-T5. Gene. 2005 Dec 30;2-12. Epub 2005 Aug 22. PubMed PMID: 16112824.
		Prudhomme S, Bonnaud B, Mallet F. Endogenous retroviruses and animal reproduction. Cytogenet Genome Res. 2005;110(1-4):353-64. Review. PubMed PMID: 16093687.
		Dolei A. MSRV/HERV-W/syncytin and its linkage to multiple sclerosis: the usability and the hazard of a human endogenous retrovirus. J Neurovirol. 2005 Apr;11(2):232-5. Review. PubMed PMID: 16036802.
		Landriscina M, Fabiano A, Altamura S, Bagal√† C, Piscazzi A, Cassano A, Spadafora C, Giorgino F, Barone C, Cignarelli M. Reverse transcriptase inhibitors down-regulate cell proliferation in vitro and in vivo and restore thyrotropin signaling and iodine uptake in human thyroid anaplastic carcinoma. J Clin Endocrinol Metab. 2005 Oct;90(10):5663-71. Epub 2005 Jul 19. PubMed PMID: 16030158.
		Martina Y, Kurian S, Cherqui S, Evanoff G, Wilson C, Salomon DR. Pseudotyping of porcine endogenous retrovirus by xenotropic murine leukemia virus in a pig islet xenotransplantation model. Am J Transplant. 2005 Aug;5(8):1837-47. PubMed PMID: 15996230.
		Simeonovic CJ, Ziolkowski AF, Popp SK, Milburn PJ, Lynch CA, Hamilton P, Harris K, Brown DJ, Bain SA, Wilson JD, Gibbs AJ. Porcine endogenous retrovirus encodes xenoantigens involved in porcine cellular xenograft rejection by mice. Transplantation. 2005 Jun 27;79(12):1674-82. PubMed PMID: 15973168.
		Sinkovics JG. A notable phenomenon recapitulated. A fusion product of a murine lymphoma cell and a leukemia virus-neutralizing antibody-producer host plasma cell formed spontaneously and secreting the specific antibody continuously. Acta Microbiol Immunol Hung. 2005;52(1):1-40. PubMed PMID: 15957233.
		Tipper CH, Bencsics CE, Coffin JM. Characterization of hortulanus endogenous murine leukemia virus, an endogenous provirus that encodes an infectious murine leukemia virus of a novel subgroup. J Virol. 2005 Jul;79(13):8316-29. PubMed PMID: 15956577; PubMed Central PMCID: PMC1143770.
		Di Nicuolo G, van de Kerkhove MP, Hoekstra R, Beld MG, Amoroso P, Battisti S, Starace M, di Florio E, Scuderi V, Scala S, Bracco A, Mancini A, Chamuleau RA, Calise F. No evidence of in vitro and in vivo porcine endogenous retrovirus infection after plasmapheresis through the AMC-bioartificial liver. Xenotransplantation. 2005 Jul;12(4):286-92. PubMed PMID: 15943777.
		Berthoux L, Sebastian S, Sayah DM, Luban J. Disruption of human TRIM5alpha antiviral activity by nonhuman primate orthologues. J Virol. 2005 Jun;79(12):7883-8. PubMed PMID: 15919943; PubMed Central PMCID: PMC1143641.
		Amit M, Winkler ME, Menke S, Br√ºning E, B√ºscher K, Denner J, Haverich A, Itskovitz-Eldor J, Martin U. No evidence for infection of human embryonic stem cells by feeder cell-derived murine leukemia viruses. Stem Cells. 2005 Jun-Jul;23(6):761-71. PubMed PMID: 15917472.
		Hansen W, Grabenhorst E, Nimtz M, M√ºller K, Conradt HS, Wirth M. Generation of serum-stabilized retroviruses: reduction of alpha1,3gal-epitope synthesis in a murine NIH3T3-derived packaging cell line by expression of chimeric glycosyltransferases. Metab Eng. 2005 May;7(3):221-8. PubMed PMID: 15885620.
		Watanabe R, Miyazawa T, Matsuura Y. Cell-binding properties of the envelope proteins of porcine endogenous retroviruses. Microbes Infect. 2005 Apr;7(4):658-65. Epub 2005 Mar 22. PubMed PMID: 15876545.
		Wootton SK, Halbert CL, Miller AD. Sheep retrovirus structural protein induces lung tumours. Nature. 2005 Apr 14;434(7035):904-7. PubMed PMID: 15829964; PubMed Central PMCID: PMC1401489.
		Irgang M, Karlas A, Laue C, Specke V, Tacke SJ, Kurth R, Schrezenmeir J, Denner J. Porcine endogenous retroviruses PERV-A and PERV-B infect neither mouse cells in vitro nor SCID mice in vivo. Intervirology. 2005;48(2-3):167-73. PubMed PMID: 15812191.
		Zhang L, Yu P, Bu H, Li S, Li Y, Cheng J. Porcine endogenus retrovirus transmission from pig cell line to mouse tissues but not human cells in nude mice. Transplant Proc. 2005 Jan-Feb;37(1):493-5. PubMed PMID: 15808687.
		Elliott RB, Escobar L, Calafiore R, Basta G, Garkavenko O, Vasconcellos A, Bambra C. Transplantation of micro- and macroencapsulated piglet islets into mice and monkeys. Transplant Proc. 2005 Jan-Feb;37(1):466-9. PubMed PMID: 15808678.
		Mangeney M, Pothlichet J, Renard M, Ducos B, Heidmann T. Endogenous retrovirus expression is required for murine melanoma tumor growth in vivo. Cancer Res. 2005 Apr 1;65(7):2588-91. PubMed PMID: 15805254.
		Dunn CA, Mager DL. Transcription of the human and rodent SPAM1 / PH-20 genes initiates within an ancient endogenous retrovirus. BMC Genomics. 2005 Apr 1;47. PubMed PMID: 15804358; PubMed Central PMCID: PMC1079825.
		Alamgir AS, Owens N, Lavignon M, Malik F, Evans LH. Precise identification of endogenous proviruses of NFS/N mice participating in recombination with moloney ecotropic murine leukemia virus (MuLV) to generate polytropic MuLVs. J Virol. 2005 Apr;79(8):4664-71. PubMed PMID: 15795252; PubMed Central PMCID: PMC1069548.
		Blaise S, de Parseval N, Heidmann T. Functional characterization of two newly identified Human Endogenous Retrovirus coding envelope genes. Retrovirology. 2005 Mar 14;19. PubMed PMID: 15766379; PubMed Central PMCID: PMC555746.
		Cho K, Pham TN, Greenhalgh DG. CD14-dependent modulation of transcriptional activities of endogenous retroviruses in the lung after injury. Virus Genes. 2005 Jan;30(1):5-12. PubMed PMID: 15744557.
		Galli UM, Sauter M, Lecher B, Maurer S, Herbst H, Roemer K, Mueller-Lantzsch N. Human endogenous retrovirus rec interferes with germ cell development in mice and may cause carcinoma in situ, the predecessor lesion of germ cell tumors. Oncogene. 2005 Apr 28;24(19):3223-8. PubMed PMID: 15735668.
		Osiecki K, Xie L, Zheng JH, Squires R, Pettoello-Mantovani M, Goldstein H. Identification of granulocyte-macrophage colony-stimulating factor and lipopolysaccharide-induced signal transduction pathways that synergize to stimulate HIV type 1 production by monocytes from HIV type 1 transgenic mice. AIDS Res Hum Retroviruses. 2005 Feb;21(2):125-39. PubMed PMID: 15725751.
		Zdobnov EM, Campillos M, Harrington ED, Torrents D, Bork P. Protein coding potential of retroviruses and other transposable elements in vertebrate genomes. Nucleic Acids Res. 2005 Feb 16;33(3):946-54. Print 2005. PubMed PMID: 15716312; PubMed Central PMCID: PMC549403.
		Rolland A, Jouvin-Marche E, Saresella M, Ferrante P, Cavaretta R, Cr√©ange A, Marche P, Perron H. Correlation between disease severity and in vitro cytokine production mediated by MSRV (multiple sclerosis associated retroviral element) envelope protein in patients with multiple sclerosis. J Neuroimmunol. 2005 Mar;160(1-2):195-203. Epub 2004 Dec 8. PubMed PMID: 15710473.
		Esnault C, Heidmann O, Delebecque F, Dewannieux M, Ribet D, Hance AJ, Heidmann T, Schwartz O. APOBEC3G cytidine deaminase inhibits retrotransposition of endogenous retroviruses. Nature. 2005 Jan 27;433(7024):430-3. PubMed PMID: 15674295.
		Boonyaratanakornkit J, Chew A, Ryu DD, Greenhalgh DG, Cho K. Murine endogenous retroviruses and their transcriptional potentials. Mamm Genome. 2004 Nov;15(11):914-23. PubMed PMID: 15672595.
		Dupressoir A, Marceau G, Vernochet C, B√©nit L, Kanellopoulos C, Sapin V, Heidmann T. Syncytin-A and syncytin-B, two fusogenic placenta-specific murine envelope genes of retroviral origin conserved in Muridae. Proc Natl Acad Sci U S A. 2005 Jan 18;102(3):725-30. Epub 2005 Jan 11. PubMed PMID: 15644441; PubMed Central PMCID: PMC545540.
		Perincheri S, Dingle RW, Peterson ML, Spear BT. Hereditary persistence of alpha-fetoprotein and H19 expression in liver of BALB/cJ mice is due to a retrovirus insertion in the Zhx2 gene. Proc Natl Acad Sci U S A. 2005 Jan 11;102(2):396-401. Epub 2004 Dec 30. PubMed PMID: 15626755; PubMed Central PMCID: PMC544306.
		Yue Y, Grossmann B, Ferguson-Smith M, Yang F, Haaf T. Comparative cytogenetics of human chromosome 3q21.3 reveals a hot spot for ectopic recombination in hominoid evolution. Genomics. 2005 Jan;85(1):36-47. PubMed PMID: 15607420.
		Burmeister T, Ebert AD, Pritze W, Loddenkemper C, Schwartz S, Thiel E. Insertional polymorphisms of endogenous HERV-K113 and HERV-K115 retroviruses in breast cancer patients and age-matched controls. AIDS Res Hum Retroviruses. 2004 Nov;20(11):1223-9. PubMed PMID: 15588344.
		Bartosch B, Stefanidis D, Myers R, Weiss R, Patience C, Takeuchi Y. Evidence and consequence of porcine endogenous retrovirus recombination. J Virol. 2004 Dec;78(24):13880-90. PubMed PMID: 15564496; PubMed Central PMCID: PMC533951.
		Tucker RM, Roark CL, Santiago-Raber ML, Izui S, Kotzin BL. Association between nuclear antigens and endogenous retrovirus in the generation of autoantibody responses in murine lupus. Arthritis Rheum. 2004 Nov;50(11):3626-36. PubMed PMID: 15529369.
		Cho K, Pham TN, Chamberlain T, Boonyaratanakornkit J, Greenhalgh DG. CD14-mediated alterations in transcription and splicing of endogenous retroviruses after injury. Arch Virol. 2004 Nov;149(11):2215-33. Epub 2004 Jun 22. PubMed PMID: 15503208.
		Ding SC, Chen YS, Wei H, Shang HT, Liu P, Li HY. [Studies on the infectivity by porcine endogenous retrovirus with porcine skin fibroblast in vitro and in vivo]. Yi Chuan Xue Bao. 2004 Aug;31(8):813-8. Chinese. PubMed PMID: 15481536.
		Ribet D, Dewannieux M, Heidmann T. An active murine transposon family pair: retrotransposition of "master" MusD copies and ETn trans-mobilization. Genome Res. 2004 Nov;14(11):2261-7. Epub 2004 Oct 12. PubMed PMID: 15479948; PubMed Central PMCID: PMC525684.
		Greenwood AD, Englbrecht CC, MacPhee RD. Characterization of an endogenous retrovirus class in elephants and their relatives. BMC Evol Biol. 2004 Oct 11;38. PubMed PMID: 15476555; PubMed Central PMCID: PMC524511.
		Antony JM, van Marle G, Opii W, Butterfield DA, Mallet F, Yong VW, Wallace JL, Deacon RM, Warren K, Power C. Human endogenous retrovirus glycoprotein-mediated induction of redox reactants causes oligodendrocyte death and demyelination. Nat Neurosci. 2004 Oct;7(10):1088-95. Epub 2004 Sep 26. PubMed PMID: 15452578.
		Huang J, Fan T, Yan Q, Zhu H, Fox S, Issaq HJ, Best L, Gangi L, Munroe D, Muegge K. Lsh, an epigenetic guardian of repetitive elements. Nucleic Acids Res. 2004 Sep 24;32(17):5019-28. Print 2004. PubMed PMID: 15448183; PubMed Central PMCID: PMC521642.
		Haviernik P, Bunting KD. Safety concerns related to hematopoietic stem cell gene transfer using retroviral vectors. Curr Gene Ther. 2004 Sep;4(3):263-76. Review. PubMed PMID: 15384940.
		Mack M, Bender K, Schneider PM. Detection of retroviral antisense transcripts and promoter activity of the HERV-K(C4) insertion in the MHC class III region. Immunogenetics. 2004 Aug;56(5):321-32. Epub 2004 Aug 12. PubMed PMID: 15309346.
		Taruscio D, Mantovani A. Factors regulating endogenous retroviral sequences in human and mouse. Cytogenet Genome Res. 2004;105(2-4):351-62. Review. PubMed PMID: 15237223.
		Spadafora C. Endogenous reverse transcriptase: a mediator of cell proliferation and differentiation. Cytogenet Genome Res. 2004;105(2-4):346-50. Review. PubMed PMID: 15237222.
		Goto M, Maeda A, Elfman L, Suling KM, Wood JC, Patience C, Groth CG, Wennberg L. No transmission of porcine endogenous retrovirus after transplantation of adult porcine islets into diabetic nude mice and immunosuppressed rats. Xenotransplantation. 2004 Jul;11(4):340-6. PubMed PMID: 15196128.
		Binette TM, Seeberger KL, Lyon JG, Rajotte RV, Korbutt GS. Porcine endogenous retroviral nucleic acid in peripheral tissues is associated with migration of porcine cells post islet transplant. Am J Transplant. 2004 Jul;4(7):1051-60. PubMed PMID: 15196061.
		Loebel DA, Tsoi B, Wong N, O'Rourke MP, Tam PP. Restricted expression of ETn-related sequences during post-implantation mouse development. Gene Expr Patterns. 2004 Jul;4(4):467-71. PubMed PMID: 15183314.
		Baillie GJ, van de Lagemaat LN, Baust C, Mager DL. Multiple groups of endogenous betaretroviruses in mice, rats, and other mammals. J Virol. 2004 Jun;78(11):5784-98. PubMed PMID: 15140976; PubMed Central PMCID: PMC415799.
		McKane BW, Ramachandran S, Xu XC, Olack BJ, Chapman WC, Mohanakumar T. Natural antibodies prevent in vivo transmission of porcine islet-derived endogenous retrovirus to human cells. Cell Transplant. 2004;13(2):137-43. PubMed PMID: 15129759.
		Belshaw R, Pereira V, Katzourakis A, Talbot G, Paces J, Burt A, Tristem M. Long-term reinfection of the human genome by endogenous retroviruses. Proc Natl Acad Sci U S A. 2004 Apr 6;101(14):4894-9. Epub 2004 Mar 25. PubMed PMID: 15044706; PubMed Central PMCID: PMC387345.
		Dissanayake SK, Thompson JA, Bosch JJ, Clements VK, Chen PW, Ksander BR, Ostrand-Rosenberg S. Activation of tumor-specific CD4(+) T lymphocytes by major histocompatibility complex class II tumor cell vaccines: a novel cell-based immunotherapy. Cancer Res. 2004 Mar 1;64(5):1867-74. PubMed PMID: 14996751.
		Mant C, Gillett C, D'Arrigo C, Cason J. Human murine mammary tumour virus-like agents are genetically distinct from endogenous retroviruses and are not detectable in breast cancer cell lines or biopsies. Virology. 2004 Jan 5;318(1):393-404. PubMed PMID: 14972564.
		Hughes JF, Coffin JM. Human endogenous retrovirus K solo-LTR formation and insertional polymorphisms: implications for human and viral evolution. Proc Natl Acad Sci U S A. 2004 Feb 10;101(6):1668-72. Epub 2004 Feb 2. PubMed PMID: 14757818; PubMed Central PMCID: PMC341815.
		Giles KE, Caputi M, Beemon KL. Packaging and reverse transcription of snRNAs by retroviruses may generate pseudogenes. RNA. 2004 Feb;10(2):299-307. PubMed PMID: 14730028; PubMed Central PMCID: PMC1370541.
		Ball M, McLellan A, Collins B, Coadwell J, Stewart F, Moore T. An abundant placental transcript containing an IAP-LTR is allelic to mouse pregnancy-specific glycoprotein 23 (Psg23): cloning and genetic analysis. Gene. 2004 Jan 21;103-13. PubMed PMID: 14697515.
		Cho K, Pham T, Adamson L, Greenhalgh D. Regulation of murine endogenous retroviruses in the thymus after injury. J Surg Res. 2003 Dec;115(2):318-24. PubMed PMID: 14697300.
		VandenDriessche T, Collen D, Chuah MK. Biosafety of onco-retroviral vectors. Curr Gene Ther. 2003 Dec;3(6):501-15. PubMed PMID: 14683449.
		Bronte V, Cingarlini S, Apolloni E, Serafini P, Marigo I, De Santo C, Macino B, Marin O, Zanovello P. Effective genetic vaccination with a widely shared endogenous retroviral tumor antigen requires CD40 stimulation during tumor rejection phase. J Immunol. 2003 Dec 15;171(12):6396-405. PubMed PMID: 14662838.
		Shepherd AJ, Wilson NJ, Smith KT. Characterisation of endogenous retrovirus in rodent cell lines used for production of biologicals. Biologicals. 2003 Dec;31(4):251-60. PubMed PMID: 14624795.
		Yu CY, Chung EK, Yang Y, Blanchong CA, Jacobsen N, Saxena K, Yang Z, Miller W, Varga L, Fust G. Dancing with complement C4 and the RP-C4-CYP21-TNX (RCCX) modules of the major histocompatibility complex. Prog Nucleic Acid Res Mol Biol. 2003;217-92. Review. PubMed PMID: 14604014.
		Ward M, Sattler R, Grossman IR, Bell AJ Jr, Skerrett D, Baxi L, Bank A. A stable murine-based RD114 retroviral packaging line efficiently transduces human hematopoietic cells. Mol Ther. 2003 Nov;8(5):804-12. PubMed PMID: 14599814.
		Hatada S, Grant DJ, Maeda N. An intronic endogenous retrovirus-like sequence attenuates human haptoglobin-related gene expression in an orientation-dependent manner. Gene. 2003 Nov 13;55-63. PubMed PMID: 14597171.
		Squire TL, Andrews MT. Pancreatic triacylglycerol lipase in a hibernating mammal. I. Novel genomic organization. Physiol Genomics. 2003 Dec 16;16(1):119-30. PubMed PMID: 14583598.
		Floyd JA, Gold DA, Concepcion D, Poon TH, Wang X, Keithley E, Chen D, Ward EJ, Chinn SB, Friedman RA, Yu HT, Moriwaki K, Shiroishi T, Hamilton BA. A natural allele of Nxf1 suppresses retrovirus insertional mutations. Nat Genet. 2003 Nov;35(3):221-8. Epub 2003 Sep 28. PubMed PMID: 14517553; PubMed Central PMCID: PMC2756099.
		Evans LH, Lavignon M, Taylor M, Alamgir AS. Antigenic subclasses of polytropic murine leukemia virus (MLV) isolates reflect three distinct groups of endogenous polytropic MLV-related sequences in NFS/N mice. J Virol. 2003 Oct;77(19):10327-38. PubMed PMID: 12970417; PubMed Central PMCID: PMC228382.
		Lynch C, Tristem M. A co-opted gypsy-type LTR-retrotransposon is conserved in the genomes of humans, sheep, mice, and rats. Curr Biol. 2003 Sep 2;13(17):1518-23. PubMed PMID: 12956954.
		Van de Perre P. Transfer of antibody via mother's milk. Vaccine. 2003 Jul 28;21(24):3374-6. Review. PubMed PMID: 12850343.
		McKane BW, Ramachandran S, Yang J, Xu XC, Mohanakumar T. Xenoreactive anti-Galalpha(1,3)Gal antibodies prevent porcine endogenous retrovirus infection of human in vivo. Hum Immunol. 2003 Jul;64(7):708-17. PubMed PMID: 12826373.
		Thulke S, Radonic A, Siegert W, Nitsche A. Highly sensitive quantification of human cells in chimeric NOD/SCID mice by real-time PCR. Haematologica. 2003 Jun;88(6):ELT18. PubMed PMID: 12801857.
		Mangiacasale R, Pittoggi C, Sciamanna I, Careddu A, Mattei E, Lorenzini R, Travaglini L, Landriscina M, Barone C, Nervi C, Lavia P, Spadafora C. Exposure of normal and transformed cells to nevirapine, a reverse transcriptase inhibitor, reduces cell growth and promotes differentiation. Oncogene. 2003 May 8;22(18):2750-61. PubMed PMID: 12747369.
		Ericsson TA, Takeuchi Y, Templin C, Quinn G, Farhadian SF, Wood JC, Oldmixon BA, Suling KM, Ishii JK, Kitagawa Y, Miyazawa T, Salomon DR, Weiss RA, Patience C. Identification of receptors for pig endogenous retrovirus. Proc Natl Acad Sci U S A. 2003 May 27;100(11):6759-64. Epub 2003 May 9. PubMed PMID: 12740431; PubMed Central PMCID: PMC164520.
		Meazza R, Comes A, Orengo AM, Ferrini S, Accolla RS. Tumor rejection by gene transfer of the MHC class II transactivator in murine mammary adenocarcinoma cells. Eur J Immunol. 2003 May;33(5):1183-92. PubMed PMID: 12731043.
		Jude BA, Pobezinskaya Y, Bishop J, Parke S, Medzhitov RM, Chervonsky AV, Golovkina TV. Subversion of the innate immune system by a retrovirus. Nat Immunol. 2003 Jun;4(6):573-8. Epub 2003 May 5. PubMed PMID: 12730691.
		Shah CA, B√∂ni J, Bisset LR, Seebach JD, Sch√ºpbach J. Ultra-sensitive and specific detection of porcine endogenous retrovirus (PERV) using a sequence-capture real-time PCR approach. J Virol Methods. 2003 May;109(2):209-16. PubMed PMID: 12711065.
		Gaudet F, Hodgson JG, Eden A, Jackson-Grusby L, Dausman J, Gray JW, Leonhardt H, Jaenisch R. Induction of tumors in mice by genomic hypomethylation. Science. 2003 Apr 18;300(5618):489-92. PubMed PMID: 12702876.
		Perl A. Role of endogenous retroviruses in autoimmune diseases. Rheum Dis Clin North Am. 2003 Feb;29(1):123-43, vii. Review. PubMed PMID: 12635504.
		Dudley JP. Tag, you're hit: retroviral insertions identify genes involved in cancer. Trends Mol Med. 2003 Feb;9(2):43-5. Review. PubMed PMID: 12615036.
		Firouzi R, Rolland A, Michel M, Jouvin-Marche E, Hauw JJ, Malcus-Vocanson C, Lazarini F, Gebuhrer L, Seigneurin JM, Touraine JL, Sanhadji K, Marche PN, Perron H. Multiple sclerosis-associated retrovirus particles cause T lymphocyte-dependent death with brain hemorrhage in humanized SCID mice model. J Neurovirol. 2003 Feb;9(1):79-93. PubMed PMID: 12587071.
		Costas J. Molecular characterization of the recent intragenomic spread of the murine endogenous retrovirus MuERV-L. J Mol Evol. 2003 Feb;56(2):181-6. PubMed PMID: 12574865.
		Reid GG, Milne EW, Coggins LW, Wilson NJ, Smith KT, Shepherd AJ. Comparison of electron microscopic techniques for enumeration of endogenous retrovirus in mouse and Chinese hamster cell lines used for production of biologics. J Virol Methods. 2003 Mar;108(1):91-6. PubMed PMID: 12565158.
		Waldburger JM, Rossi S, Hollander GA, Rodewald HR, Reith W, Acha-Orbea H. Promoter IV of the class II transactivator gene is essential for positive selection of CD4+ T cells. Blood. 2003 May 1;101(9):3550-9. Epub 2002 Dec 27. PubMed PMID: 12506036.
		Ferrari M, Scalvini A, Losio MN, Corradi A, Soncini M, Bignotti E, Milanesi E, Ajmone-Marsan P, Barlati S, Bellotti D, Tonelli M. Establishment and characterization of two new pig cell lines for use in virological diagnostic laboratories. J Virol Methods. 2003 Feb;107(2):205-12. PubMed PMID: 12505635.
		Alexander JJ, Saxena AK, Bao L, Jacob A, Haas M, Quigg RJ. Prominent renal expression of a murine leukemia retrovirus in experimental systemic lupus erythematosus. J Am Soc Nephrol. 2002 Dec;13(12):2869-77. PubMed PMID: 12444205.
		Hook LM, Jude BA, Ter-Grigorov VS, Hartley JW, Morse HC 3rd, Trainin Z, Toder V, Chervonsky AV, Golovkina TV. Characterization of a novel murine retrovirus mixture that facilitates hematopoiesis. J Virol. 2002 Dec;76(23):12112-22. PubMed PMID: 12414952; PubMed Central PMCID: PMC136857.
		Schiedlmeier B, Klump H, Will E, Arman-Kalcek G, Li Z, Wang Z, Rimek A, Friel J, Baum C, Ostertag W. High-level ectopic HOXB4 expression confers a profound in vivo competitive growth advantage on human cord blood CD34+ cells, but impairs lymphomyeloid differentiation. Blood. 2003 Mar 1;101(5):1759-68. Epub 2002 Oct 24. PubMed PMID: 12406897.
		Sichangi MW, Langat DK, Mwenda JM. Endogenous retrovirus sequences expressed in male mammalian reproductive tissues: a review. East Afr Med J. 2002 Jan;79(1):38-41. PubMed PMID: 12380869.
		Spencer TE, Bazer FW. Biology of progesterone action during pregnancy recognition and maintenance of pregnancy. Front Biosci. 2002 Sep 1;d1879-98. Review. PubMed PMID: 12161340.
		Cl√©menceau B, J√©gou D, Martignat L, Sa√Ø P. Microchimerism and transmission of porcine endogenous retrovirus from a pig cell line or specific pathogen-free pig islets to mouse tissues and human cells during xenografts in nude mice. Diabetologia. 2002 Jun;45(6):914-23. Epub 2002 May 15. PubMed PMID: 12107737.
		Griffiths DJ, Voisset C, Venables PJ, Weiss RA. Novel endogenous retrovirus in rabbits previously reported as human retrovirus 5. J Virol. 2002 Jul;76(14):7094-102. PubMed PMID: 12072509; PubMed Central PMCID: PMC136318.
		Staplin WR, Hodgson CP, Knezetic JA. Conserved, erythropoietin-responsive VL30 promoters isolated from erythroid progenitor cells. Blood Cells Mol Dis. 2002 Mar-Apr;28(2):275-82. PubMed PMID: 12064922.
		Blusch JH, Patience C, Martin U. Pig endogenous retroviruses and xenotransplantation. Xenotransplantation. 2002 Jul;9(4):242-51. Review. PubMed PMID: 12060460.
		Lavillette D, Marin M, Ruggieri A, Mallet F, Cosset FL, Kabat D. The envelope glycoprotein of human endogenous retrovirus type W uses a divergent family of amino acid transporters/cell surface receptors. J Virol. 2002 Jul;76(13):6442-52. PubMed PMID: 12050356; PubMed Central PMCID: PMC136247.
		Ceccarelli AV, Rozengurt N. Outbreak of hind limb paralysis in young CFW Swiss Webster mice. Comp Med. 2002 Apr;52(2):171-5. PubMed PMID: 12022398.
		Bachelier R, Vincent A, Mathevet P, Magdinier F, Lenoir GM, Frappart L. Retroviral transduction of splice variant Brca1-Delta11 or mutant Brca1-W1777Stop causes mouse epithelial mammary atypical duct hyperplasia. Virchows Arch. 2002 Mar;440(3):261-6. Epub 2001 Sep 22. PubMed PMID: 11889595.
		McQueen KL, Wilhelm BT, Harden KD, Mager DL. Evolution of NK receptors: a single Ly49 and multiple KIR genes in the cow. Eur J Immunol. 2002 Mar;32(3):810-7. PubMed PMID: 11870625.
		Str√≠sovsk√Ω K, Smrz D, Fehrmann F, Kr√§usslich HG, Konvalinka J. The murine endogenous retrovirus MIA14 encodes an active aspartic proteinase that is functionally similar to proteinases from D-type retroviruses. Arch Biochem Biophys. 2002 Feb 15;398(2):261-8. PubMed PMID: 11831858.
		Kim HS. Sequence and phylogeny of HERV-W pol fragments. AIDS Res Hum Retroviruses. 2001 Nov 20;17(17):1665-71. PubMed PMID: 11779355.
		Langford GA, Galbraith D, Whittam AJ, McEwan P, Fern√°ndez-Su√°rez XM, Black J, Shepherd A, Onions D. In vivo analysis of porcine endogenous retrovirus expression in transgenic pigs. Transplantation. 2001 Dec 27;72(12):1996-2000. PubMed PMID: 11773903.
		Robertson JS. Retroviral aspects of the characterisation of avian and mammalian cell substrates. Dev Biol (Basel). 2001;417-22; discussion 422-4, 465-75. PubMed PMID: 11761257.
		Khan AS, Sears JF. Pert analysis of endogenous retroviruses induced from K-BALB mouse cells treated with 5-iododeoxyuridine: a potential strategy for detection of inducible retroviruses from vaccine cell substrates. Dev Biol (Basel). 2001;387-92; discussion 392-3. PubMed PMID: 11761254.
		Jolicoeur P. Pathogenesis of defective retroviruses. Dev Biol (Basel). 2001;201-8; discussion 209-10, 253-63. PubMed PMID: 11761232.
		Purcell DF. Pathogenesis of replication competent retroviruses derived from mouse cells in immunosuppressed primates: implications for use of neoplastic cells as vaccine substrates. Dev Biol (Basel). 2001;187-98; discussion 199, 253-63. PubMed PMID: 11761231.
		Patience C, Takeuch Y, Cosset FL, Weiss RA. MuLV packaging systems as models for estimating/measuring retrovirus recombination frequency. Dev Biol (Basel). 2001;169-79; discussion 253-63. PubMed PMID: 11761229.
		Paces J, Pavl√≠cek A, Paces V. HERVd: database of human endogenous retroviruses. Nucleic Acids Res. 2002 Jan 1;30(1):205-6. PubMed PMID: 11752294; PubMed Central PMCID: PMC99133.
		Jamain S, Girondot M, Leroy P, Clergue M, Quach H, Fellous M, Bourgeron T. Transduction of the human gene FAM8A1 by endogenous retrovirus during primate evolution. Genomics. 2001 Nov;78(1-2):38-45. PubMed PMID: 11707071.
		Lorincz MC, Sch√ºbeler D, Groudine M. Methylation-mediated proviral silencing is associated with MeCP2 recruitment and localized histone H3 deacetylation. Mol Cell Biol. 2001 Dec;21(23):7913-22. PubMed PMID: 11689684; PubMed Central PMCID: PMC99960.
		Kitagawa M, Aizawa S, Sado T, Yamaguchi S, Suzuki T, Hirokawa K, Ikeda H. A gene therapy model for retrovirus-induced disease with a viral env gene: expression-dependent resistance in immunosuppressed hosts. Leukemia. 2001 Nov;15(11):1779-84. PubMed PMID: 11681421.
		Sutkowski N, Conrad B, Thorley-Lawson DA, Huber BT. Epstein-Barr virus transactivates the human endogenous retrovirus HERV-K18 that encodes a superantigen. Immunity. 2001 Oct;15(4):579-89. PubMed PMID: 11672540.
		Posnett DN, Yarilina AA. Sleeping with the enemy--endogenous superantigens in humans. Immunity. 2001 Oct;15(4):503-6. Review. PubMed PMID: 11672533.
		Palmarini M, Maeda N, Murgia C, De-Fraja C, Hofacre A, Fan H. A phosphatidylinositol 3-kinase docking site in the cytoplasmic tail of the Jaagsiekte sheep retrovirus transmembrane protein is essential for envelope-induced transformation of NIH 3T3 cells. J Virol. 2001 Nov;75(22):11002-9. PubMed PMID: 11602740; PubMed Central PMCID: PMC114680.
		Mangeney M, de Parseval N, Thomas G, Heidmann T. The full-length envelope of an HERV-H human endogenous retrovirus has immunosuppressive properties. J Gen Virol. 2001 Oct;82(Pt 10):2515-8. PubMed PMID: 11562544.
		Khan AS, Muller J, Sears JF. Early detection of endogenous retroviruses in chemically induced mouse cells. Virus Res. 2001 Nov 5;79(1-2):39-45. PubMed PMID: 11551644.
		Hughes DC. Alternative splicing of the human VEGFGR-3/FLT4 gene as a consequence of an integrated human endogenous retrovirus. J Mol Evol. 2001 Aug;53(2):77-9. PubMed PMID: 11479678.
		Kelly PF, Carrington J, Nathwani A, Vanin EF. RD114-pseudotyped oncoretroviral vectors. Biological and physical properties. Ann N Y Acad Sci. 2001 Jun;262-76; discussion 276-7. PubMed PMID: 11458516.
		Monitto CL, Berkowitz D, Lee KM, Pin S, Li D, Breslow M, O'Malley B, Schiller M. Differential gene expression in a murine model of cancer cachexia. Am J Physiol Endocrinol Metab. 2001 Aug;281(2):E289-97. PubMed PMID: 11440905.
		Specke V, Rubant S, Denner J. Productive infection of human primary cells and cell lines with porcine endogenous retroviruses. Virology. 2001 Jul 5;285(2):177-80. PubMed PMID: 11437652.
		Schumann G, Hermankova M, Cannon K, Mankowski JL, Boeke JD. Therapeutic effect of a Gag-nuclease fusion protein against retroviral infection in vivo. J Virol. 2001 Aug;75(15):7030-41. PubMed PMID: 11435583; PubMed Central PMCID: PMC114431.
		Logg CR, Logg A, Tai CK, Cannon PM, Kasahara N. Genomic stability of murine leukemia viruses containing insertions at the Env-3' untranslated region boundary. J Virol. 2001 Aug;75(15):6989-98. PubMed PMID: 11435579; PubMed Central PMCID: PMC114427.
		Ikegawa M, Yuan J, Matsumoto K, Herrmann S, Iwamoto A, Nakamura T, Matsushita S, Kimura T, Honjo T, Tashiro K. Elevated plasma stromal cell-derived factor 1 protein level in the progression of HIV type 1 infection/AIDS. AIDS Res Hum Retroviruses. 2001 May 1;17(7):587-95. PubMed PMID: 11375054.
		Lee H, Song JJ, Kim E, Yun CO, Choi J, Lee B, Kim J, Chang JW, Kim JH. Efficient gene transfer of VSV-G pseudotyped retroviral vector to human brain tumor. Gene Ther. 2001 Feb;8(4):268-73. PubMed PMID: 11313800.
		Svensson AC, Raudsepp T, Larsson C, Di Cristofano A, Chowdhary B, La Mantia G, Rask L, Andersson G. Chromosomal distribution, localization and expression of the human endogenous retrovirus ERV9. Cytogenet Cell Genet. 2001;92(1-2):89-96. PubMed PMID: 11306803.
		Ranganath S, Murphy KM. Structure and specificity of GATA proteins in Th2 development. Mol Cell Biol. 2001 Apr;21(8):2716-25. PubMed PMID: 11283251; PubMed Central PMCID: PMC86902.
		Schneider PM, Witzel-Schl√∂mp K, Rittner C, Zhang L. The endogenous retroviral insertion in the human complement C4 gene modulates the expression of homologous genes by antisense inhibition. Immunogenetics. 2001 Feb;53(1):1-9. PubMed PMID: 11261924.
		Liu B, Wang Y, Melana SM, Pelisson I, Najfeld V, Holland JF, Pogo BG. Identification of a proviral structure in human breast cancer. Cancer Res. 2001 Feb 15;61(4):1754-9. PubMed PMID: 11245493.
		Melana SM, Holland JF, Pogo BG. Search for mouse mammary tumor virus-like env sequences in cancer and normal breast from the same individuals. Clin Cancer Res. 2001 Feb;7(2):283-4. PubMed PMID: 11234880.
		Bromham L, Clark F, McKee JJ. Discovery of a novel murine type C retrovirus by data mining. J Virol. 2001 Mar;75(6):3053-7. PubMed PMID: 11222735; PubMed Central PMCID: PMC115936.
		Ericsson T, Oldmixon B, Blomberg J, Rosa M, Patience C, Andersson G. Identification of novel porcine endogenous betaretrovirus sequences in miniature swine. J Virol. 2001 Mar;75(6):2765-70. PubMed PMID: 11222699; PubMed Central PMCID: PMC115900.
		Gonsky J, Bacharach E, Goff SP. Identification of residues of the Moloney murine leukemia virus nucleocapsid critical for viral DNA synthesis in vivo. J Virol. 2001 Mar;75(6):2616-26. PubMed PMID: 11222684; PubMed Central PMCID: PMC115885.
		Elliott RB, Escobar L, Garkavenko O, Croxson MC, Schroeder BA, McGregor M, Ferguson G, Beckman N, Ferguson S. No evidence of infection with porcine endogenous retrovirus in recipients of encapsulated porcine islet xenografts. Cell Transplant. 2000 Nov-Dec;9(6):895-901. PubMed PMID: 11202575.
		Lillehoj EP, Ford GM, Bachmann S, Schr√∂der J, Torrey EF, Yolken RH. Serum antibodies reactive with non-human primate retroviruses identified in acute onset schizophrenia. J Neurovirol. 2000 Dec;6(6):492-7. PubMed PMID: 11175321.
		Bieda K, Hoffmann A, Boller K. Phenotypic heterogeneity of human endogenous retrovirus particles produced by teratocarcinoma cell lines. J Gen Virol. 2001 Mar;82(Pt 3):591-6. PubMed PMID: 11172100.
		Yuan CC, Miley W, Waters D. A quantification of human cells using an ERV-3 real time PCR assay. J Virol Methods. 2001 Feb;91(2):109-17. PubMed PMID: 11164492.
		Baillie GJ, Wilkins RJ. Endogenous type D retrovirus in a marsupial, the common brushtail possum (Trichosurus vulpecula). J Virol. 2001 Mar;75(5):2499-507. PubMed PMID: 11160757; PubMed Central PMCID: PMC114837.
		Zimmerer EJ, Carneal J, Robertson JB, Ozturk M, Cardiff S, Luo M. Genome organization and phylogenetic distribution of a novel family of ancient murine endogenous proviruses with evidence for transposition-mediated proliferation. Biochem Genet. 2000 Aug;38(7-8):253-65. PubMed PMID: 11131339.
		Cantrell MA, Grahn RA, Scott L, Wichman HA. Isolation of markers from recently transposed LINE-1 retrotransposons. Biotechniques. 2000 Dec;29(6):1310-6. PubMed PMID: 11126134.
		Modin C, Lund AH, Schmitz A, Duch M, Pedersen FS. Alleviation of murine leukemia virus repression in embryonic carcinoma cells by genetically engineered primer binding sites and artificial tRNA primers. Virology. 2000 Dec 20;278(2):368-79. PubMed PMID: 11118360.
		Nicot C, Opavsky R, Mahieux R, Johnson JM, Brady JN, Wolff L, Franchini G. Tax oncoprotein trans-represses endogenous B-myb promoter activity in human T cells. AIDS Res Hum Retroviruses. 2000 Nov 1;16(16):1629-32. PubMed PMID: 11080802.
		Lawoko A, Johansson B, Rabinayaran D, Pipkorn R, Blomberg J. Increased immunoglobulin G, but not M, binding to endogenous retroviral antigens in HIV-1 infected persons. J Med Virol. 2000 Dec;62(4):435-44. PubMed PMID: 11074471.
		Deng YM, Tuch BE, Rawlinson WD. Transmission of porcine endogenous retroviruses in severe combined immunodeficient mice xenotransplanted with fetal porcine pancreatic cells. Transplantation. 2000 Oct 15;70(7):1010-6. PubMed PMID: 11045635.
		Grez M, von Melchner H. New vectors for gene therapy. Stem Cells. 1998;16 Suppl 235-43. PubMed PMID: 11012167.
		Prather RS. Cloning. Pigs is pigs. Science. 2000 Sep 15;289(5486):1886-7. PubMed PMID: 11012362.
		Tailor CS, Nouri A, Kabat D. Cellular and species resistance to murine amphotropic, gibbon ape, and feline subgroup C leukemia viruses is strongly influenced by receptor expression levels and by receptor masking mechanisms. J Virol. 2000 Oct;74(20):9797-801. PubMed PMID: 11000257; PubMed Central PMCID: PMC112417.
		van der Laan LJ, Lockey C, Griffeth BC, Frasier FS, Wilson CA, Onions DE, Hering BJ, Long Z, Otto E, Torbett BE, Salomon DR. Infection by porcine endogenous retrovirus after islet xenotransplantation in SCID mice. Nature. 2000 Sep 7;407(6800):90-4. PubMed PMID: 10993079.
		Platt JL. Xenotransplantation. New risks, new gains. Nature. 2000 Sep 7;407(6800):27, 29-30. PubMed PMID: 10993056.
		Hook LM, Agafonova Y, Ross SR, Turner SJ, Golovkina TV. Genetics of mouse mammary tumor virus-induced mammary tumors: linkage of tumor induction to the gag gene. J Virol. 2000 Oct;74(19):8876-83. PubMed PMID: 10982330; PubMed Central PMCID: PMC102082.
		Boese A, Sauter M, Galli U, Best B, Herbst H, Mayer J, Kremmer E, Roemer K, Mueller-Lantzsch N. Human endogenous retrovirus protein cORF supports cell transformation and associates with the promyelocytic leukemia zinc finger protein. Oncogene. 2000 Sep 7;19(38):4328-36. PubMed PMID: 10980608.
		Miyazawa M, Tabata N, Fujisawa R, Hashimoto K, Shiwaku H, Takei YA. Roles of endogenous retroviruses and platelets in the development of vascular injury in spontaneous mouse models of autoimmune diseases. Int J Cardiol. S65-73; discussion S75-6. PubMed PMID: 10980339.2000 Aug 31;75 Suppl
		Espinosa A, Villarreal LP. T-Ag inhibits implantation by EC cell derived embryoid bodies. Virus Genes. 2000;20(3):195-200. PubMed PMID: 10949945.
		Marin M, Tailor CS, Nouri A, Kabat D. Sodium-dependent neutral amino acid transporter type 1 is an auxiliary receptor for baboon endogenous retrovirus. J Virol. 2000 Sep;74(17):8085-93. PubMed PMID: 10933718; PubMed Central PMCID: PMC112341.
		Palmarini M, Hallwirth C, York D, Murgia C, de Oliveira T, Spencer T, Fan H. Molecular cloning and functional analysis of three type D endogenous retroviruses of sheep reveal a different cell tropism from that of the highly related exogenous jaagsiekte sheep retrovirus. J Virol. 2000 Sep;74(17):8065-76. PubMed PMID: 10933716; PubMed Central PMCID: PMC112339.
		Huang Y, Ildstad ST, Neipp M, Shirwan H. Mouse xenoantigens contribute to rat T-cell Vbeta repertoire generation in mixed xenogeneic bone marrow chimeras. Immunology. 2000 Jul;100(3):317-25. PubMed PMID: 10929053; PubMed Central PMCID: PMC2327025.
		Mager DL, Freeman JD. Novel mouse type D endogenous proviruses and ETn elements share long terminal repeat and internal sequences. J Virol. 2000 Aug;74(16):7221-9. PubMed PMID: 10906176; PubMed Central PMCID: PMC112243.
		Howard BD, Boenicke L, Schniewind B, Henne-Bruns D, Kalthoff H. Transduction of human pancreatic tumor cells with vesicular stomatitis virus G-pseudotyped retroviral vectors containing a herpes simplex virus thymidine kinase mutant gene enhances bystander effects and sensitivity to ganciclovir. Cancer Gene Ther. 2000 Jun;7(6):927-38. PubMed PMID: 10880025.
		Dittmer U, Hasenkrug KJ. Different immunological requirements for protection against acute versus persistent Friend retrovirus infections. Virology. 2000 Jun 20;272(1):177-82. PubMed PMID: 10873760.
		Lapatschek M, D√ºrr S, L√∂wer R, Magin C, Wagner H, Miethke T. Functional analysis of the env open reading frame in human endogenous retrovirus IDDMK(1,2)22 encoding superantigen activity. J Virol. 2000 Jul;74(14):6386-93. PubMed PMID: 10864649; PubMed Central PMCID: PMC112145.
		Monteyne P, Coulie PG, Coutelier JP. Analysis of the Fv1 alleles involved in the susceptibility of mice to lactate dehydrogenase-elevating virus-induced polioencephalomyelitis. J Neurovirol. 2000 Feb;6(1):89-93. PubMed PMID: 10787001.
		Mikkelsen JG, Pedersen FS. Genetic reassortment and patch repair by recombination in retroviruses. J Biomed Sci. 2000 Mar-Apr;7(2):77-99. Review. PubMed PMID: 10754383.
		Yang JC, Perry-Lalley D. The envelope protein of an endogenous murine retrovirus is a tumor-associated T-cell antigen for multiple murine tumors. J Immunother. 2000 Mar-Apr;23(2):177-83. PubMed PMID: 10746543.
		Towers GJ, Stockholm D, Labrousse-Najburg V, Carlier F, Danos O, Pag√®s JC. One step screening of retroviral producer clones by real time quantitative PCR. J Gene Med. 1999 Sep-Oct;1(5):352-9. PubMed PMID: 10738552.
		Gomez G, Clarkin KZ, Kraig E, Infante AJ, Richie ER. TCR v(beta) repertoire restriction and lack of CDR3 conservation implicate TCR-superantigen interactions in promoting the clonal evolution of murine thymic lymphomas. Int Immunol. 2000 Mar;12(3):263-70. PubMed PMID: 10700461.
		Fraser J, Arcus V, Kong P, Baker E, Proft T. Superantigens - powerful modifiers of the immune system. Mol Med Today. 2000 Mar;6(3):125-32. Review. PubMed PMID: 10689316.
		Wu R, Connolly DC, Dunn RL, Cho KR. Restored expression of fragile histidine triad protein and tumorigenicity of cervical carcinoma cells. J Natl Cancer Inst. 2000 Feb 16;92(4):338-44. PubMed PMID: 10675384.
		Kjellman C, Sj√∂gren HO, Salford LG, Widegren B. HERV-F (XA34) is a full-length human endogenous retrovirus expressed in placental and fetal tissues. Gene. 1999 Oct 18;239(1):99-107. PubMed PMID: 10571039.
		Casau AE, Vaughan JE, Lozano G, Levine AJ. Germ cell expression of an isolated human endogenous retroviral long terminal repeat of the HERV-K/HTDV family in transgenic mice. J Virol. 1999 Dec;73(12):9976-83. PubMed PMID: 10559311; PubMed Central PMCID: PMC113048.
		Wolgamot G, Miller AD. Replication of Mus dunni endogenous retrovirus depends on promoter activation followed by enhancer multimerization. J Virol. 1999 Dec;73(12):9803-9. PubMed PMID: 10559291; PubMed Central PMCID: PMC113028.
		Hesse I, Luz A, Kohleisen B, Erfle V, Schmidt J. Prenatal transmission and pathogenicity of endogenous ecotropic murine leukemia virus Akv. Lab Anim Sci. 1999 Oct;49(5):488-95. PubMed PMID: 10551449.
		Mager DL. Human endogenous retroviruses and pathogenicity: genomic considerations. Trends Microbiol. 1999 Nov;7(11):431; author reply 431-2. PubMed PMID: 10542420.
		Katsumata K, Ikeda H, Sato M, Ishizu A, Kawarada Y, Kato H, Wakisaka A, Koike T, Yoshiki T. Cytokine regulation of env gene expression of human endogenous retrovirus-R in human vascular endothelial cells. Clin Immunol. 1999 Oct;93(1):75-80. PubMed PMID: 10497013.
		Pogo BG, Melana SM, Holland JF, Mandeli JF, Pilotti S, Casalini P, M√©nard S. Sequences homologous to the mouse mammary tumor virus env gene in human breast carcinoma correlate with overexpression of laminin receptor. Clin Cancer Res. 1999 Aug;5(8):2108-11. PubMed PMID: 10473094.
		Barbulescu M, Turner G, Seaman MI, Deinard AS, Kidd KK, Lenz J. Many human endogenous retrovirus K (HERV-K) proviruses are unique to humans. Curr Biol. 1999 Aug 26;9(16):861-8. PubMed PMID: 10469592.
		Mager DL, Hunter DG, Schertzer M, Freeman JD. Endogenous retroviruses provide the primary polyadenylation signal for two new human genes (HHLA2 and HHLA3). Genomics. 1999 Aug 1;59(3):255-63. PubMed PMID: 10444326.
		de Parseval N, Forrest G, Venables PJ, Heidmann T. ERV-3 envelope expression and congenital heart block: what does a physiological knockout teach us. Autoimmunity. 1999;30(2):81-3. Erratum in: Autoimmunity 1999;31(2):149. PubMed PMID: 10435720.
		G√ºnzburg WH, Karle P, Renz R, Salmons B, Renner M. Characterization of a human cell clone expressing cytochrome P450 for safe use in human somatic cell therapy. Ann N Y Acad Sci. 1999 Jun 30;326-36. PubMed PMID: 10415877.
		Nilsson BO, Jin M, Andersson AC, Sundstr√∂m P, Larsson E. Expression of envelope proteins of endogeneous C-type retrovirus on the surface of mouse and human oocytes at fertilization. Virus Genes. 1999;18(2):115-20. PubMed PMID: 10403697.
		Green WR. Cytotoxic T lymphocytes to endogenous mouse retroviruses and mechanisms of retroviral escape. Immunol Rev. 1999 Apr;271-86. Review. PubMed PMID: 10399080.
		Theimer CA, Giedroc DP. Equilibrium unfolding pathway of an H-type RNA pseudoknot which promotes programmed -1 ribosomal frameshifting. J Mol Biol. 1999 Jun 25;289(5):1283-99. PubMed PMID: 10373368.
		Lund AH, Schmidt J, Luz A, S√∏rensen AB, Duch M, Pedersen FS. Replication and pathogenicity of primer binding site mutants of SL3-3 murine leukemia viruses. J Virol. 1999 Jul;73(7):6117-22. PubMed PMID: 10364369; PubMed Central PMCID: PMC112678.
		Zhao Y, Jacobs CP, Wang L, Hardies SC. MuERVC: a new family of murine retrovirus-related repetitive sequences and its relationship to previously known families. Mamm Genome. 1999 May;10(5):477-81. PubMed PMID: 10337621.
		Bundy LM, Fan H. Molecular and phylogenetic analysis of SRS 19-6 murine leukemia virus. Virus Genes. 1999;18(1):65-79. PubMed PMID: 10334039.
		Kowalski PE, Freeman JD, Mager DL. Intergenic splicing between a HERV-H endogenous retrovirus and two adjacent human genes. Genomics. 1999 May 1;57(3):371-9. PubMed PMID: 10329003.
		Chen Z, Li K, Rowland RR, Plagemann PG. Selective antibody neutralization prevents neuropathogenic lactate dehydrogenase-elevating virus from causing paralytic disease in immunocompetent mice. J Neurovirol. 1999 Apr;5(2):200-8. PubMed PMID: 10321985.
		Ristevski S, Purcell DF, Marshall J, Campagna D, Nouri S, Fenton SP, McPhee DA, Kannourakis G. Novel endogenous type D retroviral particles expressed at high levels in a SCID mouse thymic lymphoma. J Virol. 1999 Jun;73(6):4662-9. PubMed PMID: 10233925; PubMed Central PMCID: PMC112507.
		Langat DK, Johnson PM, Rote NS, Wango EO, Owiti GO, Mwenda JM. Immunohistochemical localization of retroviral-related antigens expressed in normal baboon placental villous tissue. J Med Primatol. 1998 Dec;27(6):278-86. PubMed PMID: 10203007.
		Tailor CS, Nouri A, Zhao Y, Takeuchi Y, Kabat D. A sodium-dependent neutral-amino-acid transporter mediates infections of feline and baboon endogenous retroviruses and simian type D retroviruses. J Virol. 1999 May;73(5):4470-4. PubMed PMID: 10196349; PubMed Central PMCID: PMC104338.
		Tomonaga K, Coffin JM. Structures of endogenous nonecotropic murine leukemia virus (MLV) long terminal repeats in wild mice: implication for evolution of MLVs. J Virol. 1999 May;73(5):4327-40. PubMed PMID: 10196331; PubMed Central PMCID: PMC104214.
		Yin H, Medstrand P, Kristofferson A, Dietrich U, Aman P, Blomberg J. Characterization of human MMTV-like (HML) elements similar to a sequence that was highly expressed in a human breast cancer: further definition of the HML-6 group. Virology. 1999 Mar 30;256(1):22-35. PubMed PMID: 10087223.
		B√©nit L, Lallemand JB, Casella JF, Philippe H, Heidmann T. ERV-L elements: a family of endogenous retrovirus-like elements active throughout the evolution of mammals. J Virol. 1999 Apr;73(4):3301-8. PubMed PMID: 10074184; PubMed Central PMCID: PMC104094.
		Kim HS, Crow TJ. Isolation of novel human endogenous retrovirus HC2-like elements in human chromosomes. AIDS Res Hum Retroviruses. 1999 Feb 10;15(3):299-302. PubMed PMID: 10052761.
		Rasko JE, Battini JL, Gottschalk RJ, Mazo I, Miller AD. The RD114/simian type D retrovirus receptor is a neutral amino acid transporter. Proc Natl Acad Sci U S A. 1999 Mar 2;96(5):2129-34. PubMed PMID: 10051606; PubMed Central PMCID: PMC26748.
		Andersson ML, Lindeskog M, Medstrand P, Westley B, May F, Blomberg J. Diversity of human endogenous retrovirus class II-like sequences. J Gen Virol. 1999 Jan;80 ( Pt 1):255-60. PubMed PMID: 9934709.
		Walsh CP, Bestor TH. Cytosine methylation and mammalian development. Genes Dev. 1999 Jan 1;13(1):26-34. PubMed PMID: 9887097; PubMed Central PMCID: PMC316374.
		Qi CF, Bonhomme F, Buckler-White A, Buckler C, Orth A, Lander MR, Chattopadhyay SK, Morse HC 3rd. Molecular phylogeny of Fv1. Mamm Genome. 1998 Dec;9(12):1049-55. PubMed PMID: 9880676.
		Rodriguez-Garcia MI, Morgan RO, Fernandez MR, Bances P, Fernandez MP. Mouse annexin V genomic organization includes an endogenous retrovirus. Biochem J. 1999 Jan 1;337 ( Pt 1):125-31. PubMed PMID: 9854034; PubMed Central PMCID: PMC1219945.
		Mangeney M, Heidmann T. Tumor cells expressing a retroviral envelope escape immune rejection in vivo. Proc Natl Acad Sci U S A. 1998 Dec 8;95(25):14920-5. PubMed PMID: 9843991; PubMed Central PMCID: PMC24551.
		Rynditch AV, Zoubak S, Tsyba L, Tryapitsina-Guley N, Bernardi G. The regional integration of retroviral sequences into the mosaic genomes of mammals. Gene. 1998 Nov 5;222(1):1-16. Review. Erratum in: Gene 1999 Oct 18;239(1):201. PubMed PMID: 9813219.
		Wolgamot G, Rasko JE, Miller AD. Retrovirus packaging cells expressing the Mus dunni endogenous virus envelope facilitate transduction of CHO and primary hematopoietic cells. J Virol. 1998 Dec;72(12):10242-5. PubMed PMID: 9811768; PubMed Central PMCID: PMC110606.
		Takeuchi Y, Patience C, Magre S, Weiss RA, Banerjee PT, Le Tissier P, Stoye JP. Host range and interference studies of three classes of pig endogenous retrovirus. J Virol. 1998 Dec;72(12):9986-91. PubMed PMID: 9811736; PubMed Central PMCID: PMC110514.
		Lee SY, Howard TM, Rasheed S. Genetic analysis of the rat leukemia virus: influence of viral sequences in transduction of the c-ras proto-oncogene and expression of its transforming activity. J Virol. 1998 Dec;72(12):9906-17. PubMed PMID: 9811727; PubMed Central PMCID: PMC110503.
		Aranha-Creado H, Peterson J, Huang PY. Clearance of murine leukaemia virus from monoclonal antibody solution by a hydrophilic PVDF microporous membrane filter. Biologicals. 1998 Jun;26(2):167-72. PubMed PMID: 9811524.
		Walsh CP, Chaillet JR, Bestor TH. Transcription of IAP endogenous retroviruses is constrained by cytosine methylation. Nat Genet. 1998 Oct;20(2):116-7. PubMed PMID: 9771701.
		Tung FY, Rinaldo CR Jr, Montelaro RC. Replication-defective HIV as a vaccine candidate. AIDS Res Hum Retroviruses. 1998 Sep 20;14(14):1247-52. PubMed PMID: 9764908.
		Tomonaga K, Coffin JM. Structure and distribution of endogenous nonecotropic murine leukemia viruses in wild mice. J Virol. 1998 Oct;72(10):8289-300. PubMed PMID: 9733873; PubMed Central PMCID: PMC110191.
		Baumann JG, G√ºnzburg WH, Salmons B. CrFK feline kidney cells produce an RD114-like endogenous virus that can package murine leukemia virus-based vectors. J Virol. 1998 Sep;72(9):7685-7. PubMed PMID: 9696876; PubMed Central PMCID: PMC110043.
		Wolgamot G, Bonham L, Miller AD. Sequence analysis of Mus dunni endogenous virus reveals a hybrid VL30/gibbon ape leukemia virus-like structure and a distinct envelope. J Virol. 1998 Sep;72(9):7459-66. PubMed PMID: 9696842; PubMed Central PMCID: PMC109979.
		Ballantyne J, Henry DL, Muller JR, Briere F, Snapper CM, Kehry M, Marcu KB. Efficient recombination of a switch substrate retrovector in CD40-activated B lymphocytes: implications for the control of CH gene switch recombination. J Immunol. 1998 Aug 1;161(3):1336-47. Erratum in: J Immunol 1999 Mar 1;162(5):3103. PubMed PMID: 9686596.
		Casabianca A, Vallanti G, Magnani M. Competitive PCR for quantification of BM5d proviral DNA in mice with AIDS. J Clin Microbiol. 1998 Aug;36(8):2371-4. PubMed PMID: 9666028; PubMed Central PMCID: PMC105054.
		Harris JR. Placental endogenous retrovirus (ERV): structural, functional, and evolutionary significance. Bioessays. 1998 Apr;20(4):307-16. Review. PubMed PMID: 9619102.
		Nuckols JD, Thomas CY. The mouse H-2A region influences the envelope gene structure of tumor-associated murine leukemia viruses. J Virol. 1998 May;72(5):3973-9. PubMed PMID: 9557684; PubMed Central PMCID: PMC109624.
		Patience C, Takeuchi Y, Cosset FL, Weiss RA. Packaging of endogenous retroviral sequences in retroviral vectors produced by murine and human packaging cells. J Virol. 1998 Apr;72(4):2671-6. PubMed PMID: 9525584; PubMed Central PMCID: PMC109709.
		Chong H, Starkey W, Vile RG. A replication-competent retrovirus arising from a split-function packaging cell line was generated by recombination events between the vector, one of the packaging constructs, and endogenous retroviral sequences. J Virol. 1998 Apr;72(4):2663-70. PubMed PMID: 9525583; PubMed Central PMCID: PMC109708.
		Tsumura H, Miyazawa M, Ogawa S, Wang JZ, Ito Y, Shimura K. Detection of endogenous retrovirus antigens in NOD mouse pancreatic beta-cells. Lab Anim. 1998 Jan;32(1):86-94. PubMed PMID: 9481699.
		Zs√≠ros J, Jebbink MF, Lukashov VV, Vo√ªte PA, Berkhout B. Evolutionary relationships within a subgroup of HERV-K-related human endogenous retroviruses. J Gen Virol. 1998 Jan;79 ( Pt 1):61-70. PubMed PMID: 9460924.
		L√≥pez-Lastra M, Gabus C, Darlix JL. Characterization of an internal ribosomal entry segment within the 5' leader of avian reticuloendotheliosis virus type A RNA and development of novel MLV-REV-based retroviral vectors. Hum Gene Ther. 1997 Nov 1;8(16):1855-65. PubMed PMID: 9382952.
		Dhellin O, Maestre J, Heidmann T. Functional differences between the human LINE retrotransposon and retroviral reverse transcriptases for in vivo mRNA reverse transcription. EMBO J. 1997 Nov 3;16(21):6590-602. PubMed PMID: 9351839; PubMed Central PMCID: PMC1170263.
		Miller JS, Tessmer-Tuck J, Blake N, Lund J, Scott A, Blazar BR, Orchard PJ. Endogenous IL-2 production by natural killer cells maintains cytotoxic and proliferative capacity following retroviral-mediated gene transfer. Exp Hematol. 1997 Oct;25(11):1140-8. PubMed PMID: 9328450.
		Fehrmann F, Welker R, Kr√§usslich HG. Intracisternal A-type particles express their proteinase in a separate reading frame by translational frameshifting, similar to D-type retroviruses. Virology. 1997 Sep 1;235(2):352-9. PubMed PMID: 9281515.
		Mador N, Falk H, Bergel M, Panet A, Hochman J. Variant mouse lymphoma cells with modified response to interferon demonstrate enhanced immunogenicity. Cancer Immunol Immunother. 1997 Jul;44(5):249-56. PubMed PMID: 9247559.
		Blusch JH, Haltmeier M, Frech K, Sander I, Leib-M√∂sch C, Brack-Werner R, Werner T. Identification of endogenous retroviral sequences based on modular organization: proviral structure at the SSAV1 locus. Genomics. 1997 Jul 1;43(1):52-61. PubMed PMID: 9226372.
		Bonham L, Wolgamot G, Miller AD. Molecular cloning of Mus dunni endogenous virus: an unusual retrovirus in a new murine viral interference group with a wide host range. J Virol. 1997 Jun;71(6):4663-70. PubMed PMID: 9151860; PubMed Central PMCID: PMC191688.
		Miller AD, Wolgamot G. Murine retroviruses use at least six different receptors for entry into Mus dunni cells. J Virol. 1997 Jun;71(6):4531-5. PubMed PMID: 9151846; PubMed Central PMCID: PMC191674.
		Yin H, Medstrand P, Andersson ML, Borg A, Olsson H, Blomberg J. Transcription of human endogenous retroviral sequences related to mouse mammary tumor virus in human breast and placenta: similar pattern in most malignant and nonmalignant breast tissues. AIDS Res Hum Retroviruses. 1997 Apr 10;13(6):507-16. PubMed PMID: 9100993.
		Reiprich S, Gundlach BR, Fleckenstein B, Uberla K. Replication-competent chimeric lenti-oncovirus with expanded host cell tropism. J Virol. 1997 Apr;71(4):3328-31. PubMed PMID: 9060704; PubMed Central PMCID: PMC191473.
		Patience C, Wilkinson DA, Weiss RA. Our retroviral heritage. Trends Genet. 1997 Mar;13(3):116-20. Review. PubMed PMID: 9066271.
		Dosne Pasqualini C. [Retrovirus and cancer revisited]. Medicina (B Aires). 1997;57 Suppl 3-18. Spanish. PubMed PMID: 9567340.
		Nepomnaschy I, Buggiano V, Goldman A, Piazzon I. [Coevolutive mechanisms between retroviruses and their hosts. The murine mammary tumor model]. Medicina (B Aires). 1997;57(2):235-44. Spanish. PubMed PMID: 9532836.
		Rasmussen HB, Clausen J. Possible involvement of endogenous retroviruses in the development of autoimmune disorders, especially multiple sclerosis. Acta Neurol Scand Suppl. 1997;32-7. Review. PubMed PMID: 9174638.
		Pogo BG, Holland JF. Possibilities of a viral etiology for human breast cancer. A review. Biol Trace Elem Res. 1997 Jan;56(1):131-42. Review. PubMed PMID: 9152517.
		Heinemeyer T, Klingenhoff A, Hansen W, Schumacher L, Hauser H, Wirth M. A sensitive method for the detection of murine C-type retroviruses. J Virol Methods. 1997 Jan;63(1-2):155-65. PubMed PMID: 9015286.
		Penninger JM, Wallace VA, Molina T, Mak TW. Lineage-specific control of superantigen-induced cell death by the protein tyrosine kinase p56(lck). J Immunol. 1996 Dec 15;157(12):5359-66. PubMed PMID: 8955183.
		Gimbel W, Schmidt J, Brack-Werner R, Luz A, Strauss PG, Erfle V, Werner T. Molecular and pathogenic characterization of the RFB osteoma virus: lack of oncogene and induction of osteoma, osteopetrosis, and lymphoma. Virology. 1996 Oct 15;224(2):533-8. PubMed PMID: 8874513.
		Li M, Muller J, Xu F, Hearing VJ, Gorelik E. Inhibition of melanoma-associated antigen expression and ecotropic retrovirus production in B16BL6 melanoma cells transfected with major histocompatibility complex class I genes. Cancer Res. 1996 Oct 1;56(19):4464-74. PubMed PMID: 8813142.
		Nakagawa K, Harrison LC. The potential roles of endogenous retroviruses in autoimmunity. Immunol Rev. 1996 Aug;193-236. Review. PubMed PMID: 8930674.
		Herrmann M, Hagenhofer M, Kalden JR. Retroviruses and systemic lupus erythematosus. Immunol Rev. 1996 Aug;145-56. Review. PubMed PMID: 8930671.
		Walchner M, Leib-M√∂sch C, Messer G, Kind P. [Endogenous retroviral sequences as a factor in the pathogenesis of systemic lupus erythematosus]. Hautarzt. 1996 Jul;47(7):502-9. Review. German. PubMed PMID: 8926164.
		Shibata M. [Study on the specificity of a monoclonal antibody against recombinant envelope proteins of a human endogenous retrovirus, ERV3]. Hokkaido Igaku Zasshi. 1996 Jul;71(4):463-73. Japanese. PubMed PMID: 8809571.
		Andersson ML, Medstrand P, Yin H, Blomberg J. Differential expression of human endogenous retroviral sequences similar to mouse mammary tumor virus in normal peripheral blood mononuclear cells. AIDS Res Hum Retroviruses. 1996 Jun 10;12(9):833-40. PubMed PMID: 8738436.
		Muller J, Khan AS, Li M, Rao V, Hearing VJ, Gorelik E. Phenotypic changes and loss of melanoma-specific endogenous C-type retroviruses in BL6 melanoma cells transfected with the H-2Kb gene. Melanoma Res. 1996 Apr;6(2):101-11. PubMed PMID: 8791267.
		Ren S, Wong BY, Li J, Luo XN, Wong PM, Atweh GF. Production of genetically stable high-titer retroviral vectors that carry a human gamma-globin gene under the control of the alpha-globin locus control region. Blood. 1996 Mar 15;87(6):2518-24. PubMed PMID: 8630419.
		Fenjves ES, Yao SN, Kurachi K, Taichman LB. Loss of expression of a retrovirus-transduced gene in human keratinocytes. J Invest Dermatol. 1996 Mar;106(3):576-8. PubMed PMID: 8648197.
		Miller AD, Bonham L, Alfano J, Kiem HP, Reynolds T, Wolgamot G. A novel murine retrovirus identified during testing for helper virus in human gene transfer trials. J Virol. 1996 Mar;70(3):1804-9. PubMed PMID: 8627704; PubMed Central PMCID: PMC190007.
		Baum C, Eckert HG, Stocking C, Ostertag W. Activity of Friend mink cell focus-forming retrovirus during myelo-erythroid hematopoiesis. Exp Hematol. 1996 Feb;24(2):364-70. PubMed PMID: 8641367.
		Hohenadl C, Leib-M√∂sch C, Hehlmann R, Erfle V. Biological significance of human endogenous retroviral sequences. J Acquir Immune Defic Syndr Hum Retrovirol. 1996;13 Suppl S268-73. Review. PubMed PMID: 8797734.
		Urnovitz HB, Murphy WH. Human endogenous retroviruses: nature, occurrence, and clinical implications in human disease. Clin Microbiol Rev. 1996 Jan;9(1):72-99. Review. PubMed PMID: 8665478; PubMed Central PMCID: PMC172883.
		Cosset FL, Takeuchi Y, Battini JL, Weiss RA, Collins MK. High-titer packaging cells producing recombinant retroviruses resistant to human serum. J Virol. 1995 Dec;69(12):7430-6. PubMed PMID: 7494248; PubMed Central PMCID: PMC189680.
		Wang Y, Holland JF, Bleiweiss IJ, Melana S, Liu X, Pelisson I, Cantarella A, Stellrecht K, Mani S, Pogo BG. Detection of mammary tumor virus env gene-like sequences in human breast cancer. Cancer Res. 1995 Nov 15;55(22):5173-9. PubMed PMID: 7585568.
		Kriukova IN, Malivanova TF, Kondrashova OM, Polevaia EB, Evtushenko VV. [Possible circulatory paths of endogenous human retroviruses, similar to murine mammary cancer virus]. Biull Eksp Biol Med. 1995 Nov;120(11):554-6. Russian. PubMed PMID: 8713343.
		Rother RP, Fodor WL, Springhorn JP, Birks CW, Setter E, Sandrin MS, Squinto SP, Rollins SA. A novel mechanism of retrovirus inactivation in human serum mediated by anti-alpha-galactosyl natural antibody. J Exp Med. 1995 Nov 1;182(5):1345-55. PubMed PMID: 7595205; PubMed Central PMCID: PMC2192220.
		Cordonnier A, Casella JF, Heidmann T. Isolation of novel human endogenous retrovirus-like elements with foamy virus-related pol sequence. J Virol. 1995 Sep;69(9):5890-7. PubMed PMID: 7543594; PubMed Central PMCID: PMC189468.
		Fiegl M, Strasser-Wozak E, Geley S, Gsur A, Drach J, Kofler R. Glucocorticoid-mediated immunomodulation: hydrocortisone enhances immunosuppressive endogenous retroviral protein (p15E) expression in mouse immune cells. Clin Exp Immunol. 1995 Aug;101(2):259-64. PubMed PMID: 7648710; PubMed Central PMCID: PMC1553281.
		Lawrenz-Smith SC, Thomas CY. The E47 transcription factor binds to the enhancer sequences of recombinant murine leukemia viruses and influences enhancer function. J Virol. 1995 Jul;69(7):4142-8. PubMed PMID: 7769673; PubMed Central PMCID: PMC189150.
		Haran-Ghera N, Peled A, Wu L, Shortman K, Brightman BK, Fan H. The effects of passive antiviral immunotherapy in AKR mice: I. The susceptibility of AKR mice to spontaneous and induced T cell lymphomagenesis. Leukemia. 1995 Jul;9(7):1199-206. PubMed PMID: 7630195.
		Vogetseder W, Denner J, Boller K, Kurth R, Dierich MP. Human endogenous retrovirus K does not encode mouse mammary tumor virus-related antigens in human breast carcinomas. AIDS Res Hum Retroviruses. 1995 Jul;11(7):869-72. PubMed PMID: 7546915.
		Lebedev YB, Volik SV, Obradovic D, Ermolaeva OD, Ashworth LK, Lennon GG, Sverdlov ED. Physical mapping of sequences homologous to an endogenous retrovirus LTR on human chromosome 19. Mol Gen Genet. 1995 Jun 25;247(6):742-8. PubMed PMID: 7616966.
		Zhang H, Duan LX, Dornadula G, Pomerantz RJ. Increasing transduction efficiency of recombinant murine retrovirus vectors by initiation of endogenous reverse transcription: potential utility for genetic therapies. J Virol. 1995 Jun;69(6):3929-32. PubMed PMID: 7538178; PubMed Central PMCID: PMC189120.
		Chen R, Doiron B, Kahn A. Glucose responsiveness of a reporter gene transduced into hepatocytic cells using a retroviral vector. FEBS Lett. 1995 May 29;365(2-3):223-6. PubMed PMID: 7781783.
		Gaƒ≠dul' KV, Chernukhin IV, Khaldoianidi SK, Svinarchuk FP, Vlasov VV, Kozlov VA. [Functional activity of T-, B-lymphocytes, and macrophages during suppression of expression of the env gene from an endogenous retrovirus genome]. Mol Biol (Mosk). 1995 May-Jun;29(3):612-8. Russian. PubMed PMID: 8552065.
		Puppi M, Henning SJ. Cloning of the rat ecotropic retroviral receptor and studies of its expression in intestinal tissues. Proc Soc Exp Biol Med. 1995 May;209(1):38-45. PubMed PMID: 7724615.
		Indraccolo S, G√ºnzburg WH, Leib-M√∂sch C, Erfle V, Salmons B. Identification of three human sequences with viral superantigen-specific primers. Mamm Genome. 1995 May;6(5):339-44. PubMed PMID: 7542948.
		Metz MZ, Best DM, Kane SE. Harvey murine sarcoma virus/MDR1 retroviral vectors: efficient virus production and foreign gene transduction using MDR1 as a selectable marker. Virology. 1995 Apr 20;208(2):634-43. PubMed PMID: 7747435.
		Rothenfluh HS. Hypothesis: a memory lymphocyte-specific soma-to-germline genetic feedback loop. Immunol Cell Biol. 1995 Apr;73(2):174-80. PubMed PMID: 7797237.
		Takekoshi KJ, Oh YH, Westerman KW, London IM, Leboulch P. Retroviral transfer of a human beta-globin/delta-globin hybrid gene linked to beta locus control region hypersensitive site 2 aimed at the gene therapy of sickle cell disease. Proc Natl Acad Sci U S A. 1995 Mar 28;92(7):3014-8. PubMed PMID: 7708766; PubMed Central PMCID: PMC42349.
		Speth C, Luz A, Strauss PG, Wendel S, Zeidler R, Dorn S, Erfle V, Brem G, Lipp M, Schmidt J. Akv murine leukemia virus enhances lymphomagenesis in myc-kappa transgenic and in wild-type mice. Virology. 1995 Jan 10;206(1):93-9. PubMed PMID: 7831845.
		Lacorazza HD, Jendoubi M. Correction of ornithine-delta-aminotransferase deficiency in a Chinese hamster ovary cell line mediated by retrovirus gene transfer. Gene Ther. 1995 Jan;2(1):22-8. PubMed PMID: 7712330.
		Vogetseder W, Feng J, Haibach C, Mayerl W, Dierich MP. Detection of a 67-kD glycoprotein in human tumor cell lines by a monoclonal antibody established against a recombinant human endogenous retrovirus-K envelope-gene-encoded protein. Exp Clin Immunogenet. 1995;12(2):96-102. PubMed PMID: 7576722.
		Takeuchi Y, Cosset FL, Lachmann PJ, Okada H, Weiss RA, Collins MK. Type C retrovirus inactivation by human complement is determined by both the viral genome and the producer cell. J Virol. 1994 Dec;68(12):8001-7. PubMed PMID: 7966590; PubMed Central PMCID: PMC237263.
		Kitado H, Higuchi K, Takeda T. Molecular genetic characterization of the senescence-accelerated mouse (SAM) strains. J Gerontol. 1994 Nov;49(6):B247-54. PubMed PMID: 7963272.
		Johnson KR, Cook SA, Davisson MT. Identification and genetic mapping of 151 dispersed members of 16 ribosomal protein multigene families in the mouse. Mamm Genome. 1994 Nov;5(11):670-87. PubMed PMID: 7873877.
		Frankel WN, Sweet HO, Davisson MT. The stumbler mutation maps to proximal mouse chromosome 2. Mamm Genome. 1994 Nov;5(11):659-62. PubMed PMID: 7873875.
		Bartman T, Murasko DM, Sieck TG, Turturro A, Hart R, Blank KJ. A murine leukemia virus expressed in aged DBA/2 mice is derived by recombination of the Emv-3 locus and another endogenous gag sequence. Virology. 1994 Aug 15;203(1):1-7. PubMed PMID: 8030264.
		Ito MR, Nose M. [Animal models for intractable vasculitis: significance of genetic background]. Nihon Rinsho. 1994 Aug;52(8):1982-6. Review. Japanese. PubMed PMID: 7933573.
		Vasetskiƒ≠ NS. [Analysis of the sequence of the endogenous Djungarian hamster provirus (MRS-Ps) related to the murine mammary cancer virus]. Mol Biol (Mosk). 1994 Jul-Aug;28(4):900-8. Russian. PubMed PMID: 7990818.
		Penninger JM, Wallace VA, Timms E, Mak TW. Maternal transfer of infectious mouse mammary tumor retroviruses does not depend on clonal deletion of superantigen-reactive V beta 14+ T cells. Eur J Immunol. 1994 May;24(5):1102-8. PubMed PMID: 8181521.
		Kim M, Duty L, Herberman R, Gorelik E. Divergent effects of H-2K and H-2D genes on sensitivity of BL6 melanoma cells to NK cells or TNF-mediated cytotoxicity. Cell Immunol. 1994 May;155(2):358-71. PubMed PMID: 8181071.
		Mitreiter K, Schmidt J, Luz A, Atkinson MJ, H√∂fler H, Erfle V, Strauss PG. Disruption of the murine p53 gene by insertion of an endogenous retrovirus-like element (ETn) in a cell line from radiation-induced osteosarcoma. Virology. 1994 May 1;200(2):837-41. PubMed PMID: 8178469.
		Beutner U, Kraus E, Kitamura D, Rajewsky K, Huber BT. B cells are essential for murine mammary tumor virus transmission, but not for presentation of endogenous superantigens. J Exp Med. 1994 May 1;179(5):1457-66. PubMed PMID: 8163931; PubMed Central PMCID: PMC2191484.
		Portis JL. Endogenous retroviral envelope antigens recognized by B lymphocytes during graft-versus-host reaction. Tohoku J Exp Med. 1994 May;173(1):83-9. Review. PubMed PMID: 7809913.
		Gourley MF, Kisch WJ, Mojcik CF, King LB, Krieg AM, Steinberg AD. Role of endogenous retroviruses in autoimmune diseases. Tohoku J Exp Med. 1994 May;173(1):105-14. Review. PubMed PMID: 7809902.
		Miyazawa M, Fujisawa R. Physiology and pathology of host immune responses to exogenous and endogenous murine retroviruses--from gene fragments to epitopes. Tohoku J Exp Med. 1994 May;173(1):91-103. Review. PubMed PMID: 7528947.
		Simon M, Haltmeier M, Papakonstantinou G, Werner T, Hehlmann R, Leib-M√∂sch C. Transcription of HERV-K-related LTRs in human placenta and leukemic cells. Leukemia. 1994 Apr;8 Suppl S12-7. PubMed PMID: 8152277.
		Gottlieb E, Haffner R, von R√ºden T, Wagner EF, Oren M. Down-regulation of wild-type p53 activity interferes with apoptosis of IL-3-dependent hematopoietic cells following IL-3 withdrawal. EMBO J. 1994 Mar 15;13(6):1368-74. PubMed PMID: 8137820; PubMed Central PMCID: PMC394954.
		Wu DK, Cepko CL. The stability of endogenous tyrosine hydroxylase protein in PC-12 cells differs from that expressed in mouse fibroblasts by gene transfer. J Neurochem. 1994 Mar;62(3):863-72. PubMed PMID: 7509376.
		Kang J, Ido E, Pawling J, Beutner U, Huber BT, Hozumi N. Expression of Mtv-7 sag gene in vivo using a retroviral vector results in selective inactivation of superantigen reactive T cells. J Immunol. 1994 Feb 1;152(3):1039-46. PubMed PMID: 8301116.
		Deo Y, Ghebremariam H, Cloyd M. Detection and characterization of murine ecotropic recombinant virus in myeloma and hybridoma cells. Hybridoma. 1994 Feb;13(1):69-76. PubMed PMID: 8200661.
		Schmidt J, Heermeier K, Linzner U, Luz A, Silbermann M, Livne E, Erfle V. Osteosarcomagenic doses of radium (224Ra) and infectious endogenous retroviruses enhance proliferation and osteogenic differentiation of skeletal tissue differentiating in vitro. Radiat Environ Biophys. 1994;33(1):69-79. PubMed PMID: 8202594.
		Hao W, Serreze DV, McCulloch DK, Neifing JL, Palmer JP. Insulin (auto)antibodies from human IDDM cross-react with retroviral antigen p73. J Autoimmun. 1993 Dec;6(6):787-98. PubMed PMID: 8155257.
		Leib-M√∂sch C, Haltmeier M, Werner T, Geigl EM, Brack-Werner R, Francke U, Erfle V, Hehlmann R. Genomic distribution and transcription of solitary HERV-K LTRs. Genomics. 1993 Nov;18(2):261-9. PubMed PMID: 8288228.
		Ali NN, Harrison MA, Rowe J, Teich NM. Spectrum of osteoblastic differentiation in new cell lines derived from spontaneous murine osteosarcomas. Bone. 1993 Nov-Dec;14(6):847-58. PubMed PMID: 8155408.
		Sakurai H. [Molecular analysis of new human endogenous retroviruses]. Hokkaido Igaku Zasshi. 1993 Nov;68(6):907-20. Japanese. PubMed PMID: 7906666.
		Medstrand P, Blomberg J. Characterization of novel reverse transcriptase encoding human endogenous retroviral sequences similar to type A and type B retroviruses: differential transcription in normal human tissues. J Virol. 1993 Nov;67(11):6778-87. PubMed PMID: 7692084; PubMed Central PMCID: PMC238119.
		Bates P, Young JA, Varmus HE. A receptor for subgroup A Rous sarcoma virus is related to the low density lipoprotein receptor. Cell. 1993 Sep 24;74(6):1043-51. PubMed PMID: 8402880.
		Szabo C, Kim YK, Mark WH. The endogenous ecotropic murine retroviruses Emv-16 and Emv-17 are both capable of producing new proviral insertions in the mouse genome. J Virol. 1993 Sep;67(9):5704-8. PubMed PMID: 8394469; PubMed Central PMCID: PMC237980.
		Rasmussen HB, Perron H, Clausen J. Do endogenous retroviruses have etiological implications in inflammatory and degenerative nervous system diseases? Acta Neurol Scand. 1993 Sep;88(3):190-8. Review. PubMed PMID: 8256555.
		Irving JM, Chang LW, Castillo FJ. A reverse transcriptase-polymerase chain reaction assay for the detection and quantitation of murine retroviruses. Biotechnology (N Y). 1993 Sep;11(9):1042-6. PubMed PMID: 7690234.
		Ho ES, O'Neill HC. T-cell differentiative capacity of haematopoietic stem cells immortalized in vitro with radiation leukemia virus. Leukemia. 1993 Aug;7(8):1281-90. Erratum in: Leukemia 1994 May;8(5):910. PubMed PMID: 8102419.
		Wu J, Zhou T, He J, Mountz JD. Autoimmune disease in mice due to integration of an endogenous retrovirus in an apoptosis gene. J Exp Med. 1993 Aug 1;178(2):461-8. PubMed PMID: 7688023; PubMed Central PMCID: PMC2191111.
		Chakraborty AK, Zink MA, Boman BM, Hodgson CP. Synthetic retrotransposon vectors for gene therapy. FASEB J. 1993 Jul;7(10):971-7. PubMed PMID: 8393821.
		Sablitzky F, J√∂nsson JI, Cohen BL, Phillips RA. High frequency expression of integrated proviruses derived from enhancer trap retroviruses. Cell Growth Differ. 1993 Jun;4(6):451-9. PubMed PMID: 8373730.
		L√∂wer R, Boller K, Hasenmaier B, Korbmacher C, M√ºller-Lantzsch N, L√∂wer J, Kurth R. Identification of human endogenous retroviruses with complex mRNA expression and particle formation. Proc Natl Acad Sci U S A. 1993 May 15;90(10):4480-4. PubMed PMID: 8506289; PubMed Central PMCID: PMC46535.
		Simpson E. T cell repertoire selection by mouse mammary tumour viruses. Eur J Immunogenet. 1993 Apr;20(2):137-49. Review. PubMed PMID: 8388249.
		Tch√©nio T, Segal-Bendirdjian E, Heidmann T. Generation of processed pseudogenes in murine cells. EMBO J. 1993 Apr;12(4):1487-97. PubMed PMID: 8385606; PubMed Central PMCID: PMC413361.
		Gonzalo JA, de Albor√°n IM, Kroemer G. Dissociation of autoaggression and self-superantigen reactivity. Scand J Immunol. 1993 Jan;37(1):1-6. Review. PubMed PMID: 8418466.
		Sharpe AH, Jaenisch R. Retroviral spongiform degenerative disease produced by the murine neurotropic retrovirus Cas-Br-E. Dev Biol Stand. 1993;45-52. PubMed PMID: 8270115.
		Gardner MB. Genetic control of retroviral disease in aging wild mice. Genetica. 1993;91(1-3):199-209. Review. PubMed PMID: 8125269.
		Wada Y, Tsukada M, Kamiyama S, Koizumi A. Retroviral gene expression as a possible biomarker of aging. Int Arch Occup Environ Health. 1993;65(1 Suppl):S235-9. PubMed PMID: 7691759.
		Wang H, Dechant E, Kavanaugh M, North RA, Kabat D. Effects of ecotropic murine retroviruses on the dual-function cell surface receptor/basic amino acid transporter. J Biol Chem. 1992 Nov 25;267(33):23617-24. PubMed PMID: 1429703.
		Herrmann T, Waanders GA, Chvatchko Y, MacDonald HR. The viral superantigen Mls-1a induces interferon-gamma secretion by specifically primed CD8+ cells but fails to trigger cytotoxicity. Eur J Immunol. 1992 Nov;22(11):2789-93. PubMed PMID: 1330577.
		Messer A, Plummer J, Maskin P, Coffin JM, Frankel WN. Mapping of the motor neuron degeneration (Mnd) gene, a mouse model of amyotrophic lateral sclerosis (ALS). Genomics. 1992 Jul;13(3):797-802. PubMed PMID: 1639406.
		Krieg AM, Gourley MF, Perl A. Endogenous retroviruses: potential etiologic agents in autoimmunity. FASEB J. 1992 May;6(8):2537-44. Review. PubMed PMID: 1592206.
		Gourley MF, Kisch WJ, Mojcik CF, King LB, Krieg AM, Steinberg AD. Molecular aspects of systemic lupus erythematosus: murine endogenous retroviral expression. DNA Cell Biol. 1992 Apr;11(3):253-7. Review. PubMed PMID: 1567558.
		Coffin JM. Superantigens and endogenous retroviruses: a confluence of puzzles. Science. 1992 Jan 24;255(5043):411-3. Review. PubMed PMID: 1310360.
		Cheng J, Yee JK, Yeargin J, Friedmann T, Haas M. Suppression of acute lymphoblastic leukemia by the human wild-type p53 gene. Cancer Res. 1992 Jan 1;52(1):222-6. PubMed PMID: 1727382.
		Acha-Orbea H, Held W, Scarpellino L, Shakhov AN. Mls: a link between immunology and retrovirology. Int Rev Immunol. 1992;8(4):327-36. Review. PubMed PMID: 1351535.
		Taruscio D, Manuelidis L. Integration site preferences of endogenous retroviruses. Chromosoma. 1991 Dec;101(3):141-56. PubMed PMID: 1790730.
		Fredholm M, Policastro PF, Wilson MC. The dispersion of defective endogenous murine retroviral elements suggests retrotransposition-mediated amplification. DNA Cell Biol. 1991 Dec;10(10):713-22. PubMed PMID: 1683774.
		Leslie KB, Lee F, Schrader JW. Intracisternal A-type particle-mediated activations of cytokine genes in a murine myelomonocytic leukemia: generation of functional cytokine mRNAs by retroviral splicing events. Mol Cell Biol. 1991 Nov;11(11):5562-70. PubMed PMID: 1922064; PubMed Central PMCID: PMC361926.
		Hatzoglou M, Bosch F, Park EA, Hanson RW. Hormonal control of interacting promoters introduced into cells by retroviruses. J Biol Chem. 1991 May 5;266(13):8416-25. PubMed PMID: 2022656.
		Hunter K, Housman D, Hopkins N. Isolation and characterization of irradiation fusion hybrids from mouse chromosome 1 for mapping Rmc-1, a gene encoding a cellular receptor for MCF class murine retroviruses. Somat Cell Mol Genet. 1991 Mar;17(2):169-83. PubMed PMID: 2011795.
		Stoye JP, Moroni C, Coffin JM. Virological events leading to spontaneous AKR thymomas. J Virol. 1991 Mar;65(3):1273-85. PubMed PMID: 1847454; PubMed Central PMCID: PMC239902.
		Scarpa M, Cournoyer D, Muzny DM, Moore KA, Belmont JW, Caskey CT. Characterization of recombinant helper retroviruses from Moloney-based vectors in ecotropic and amphotropic packaging cell lines. Virology. 1991 Feb;180(2):849-52. PubMed PMID: 1989392.
		Krauss JC, Bond LM, Todd RF 3rd, Wilson JM. Expression of retroviral transduced human CD18 in murine cells: an in vitro model of gene therapy for leukocyte adhesion deficiency. Hum Gene Ther. 1991 Fall;2(3):221-8. PubMed PMID: 1684295.
		Helmberg A, F√§ssler R, Geley S, J√∂hrer K, Kroemer G, B√∂ck G, Kofler R. Glucocorticoid-regulated gene expression in the immune system. Analysis of glucocorticoid-regulated transcripts from the mouse macrophage-like cell line P388D1. J Immunol. 1990 Dec 15;145(12):4332-7. PubMed PMID: 2258621.
		Sommerfelt MA, Williams BP, McKnight A, Goodfellow PN, Weiss RA. Localization of the receptor gene for type D simian retroviruses on human chromosome 19. J Virol. 1990 Dec;64(12):6214-20. PubMed PMID: 2173788; PubMed Central PMCID: PMC248796.
		Gerstein RM, Frankel WN, Hsieh CL, Durdik JM, Rath S, Coffin JM, Nisonoff A, Selsing E. Isotype switching of an immunoglobulin heavy chain transgene occurs by DNA recombination between different chromosomes. Cell. 1990 Nov 2;63(3):537-48. PubMed PMID: 2121365.
		Hatzoglou M, Lamers W, Bosch F, Wynshaw-Boris A, Clapp DW, Hanson RW. Hepatic gene transfer in animals using retroviruses containing the promoter from the gene for phosphoenolpyruvate carboxykinase. J Biol Chem. 1990 Oct 5;265(28):17285-93. PubMed PMID: 2170370.
		Krieg AM, Steinberg AD. Analysis of thymic endogenous retroviral expression in murine lupus. Genetic and immune studies. J Clin Invest. 1990 Sep;86(3):809-16. PubMed PMID: 2203823; PubMed Central PMCID: PMC296796.
		Ono M. Molecular biology of type A endogenous retrovirus. Kitasato Arch Exp Med. 1990 Sep;63(2-3):77-90. Review. PubMed PMID: 1710682.
		Albrecht C, Szeinfeld D, Olivier A, Wynchank S. Theoretical and experimental considerations linking an environmental stress to expression of endogenous retroviruses in a mammalian tumour. Med Hypotheses. 1990 Jun;32(2):101-5. PubMed PMID: 2165553.
		Coppola MA, Thomas CY. A host gene regulates the structure of the transmembrane envelope protein of murine leukemia viruses. J Exp Med. 1990 May 1;171(5):1739-52. PubMed PMID: 2159051; PubMed Central PMCID: PMC2187913.
		Kaleko M, Garcia JV, Osborne WR, Miller AD. Expression of human adenosine deaminase in mice after transplantation of genetically-modified bone marrow. Blood. 1990 Apr 15;75(8):1733-41. PubMed PMID: 2328323.
		Leiter EH, Hamaguchi K. Viruses and diabetes: diabetogenic role for endogenous retroviruses in NOD mice? J Autoimmun. 1990 Apr;3 Suppl 31-40. Review. PubMed PMID: 2160244.
		Okumoto M, Nishikawa R, Iwai M, Iwai Y, Takamori Y, Niwa O, Yokoro K. Lack of evidence for the involvement of type-C and type-B retroviruses in radiation leukemogenesis of NFS mice. Radiat Res. 1990 Mar;121(3):267-73. PubMed PMID: 1690435.
		Lusso P, di Marzo Veronese F, Ensoli B, Franchini G, Jemma C, DeRocco SE, Kalyanaraman VS, Gallo RC. Expanded HIV-1 cellular tropism by phenotypic mixing with murine endogenous retroviruses. Science. 1990 Feb 16;247(4944):848-52. PubMed PMID: 2305256.
		Tikhonenko AT, Lomovskaya OL. Avian endogenous provirus (ev-3) env gene sequencing: implication for pathogenic retrovirus origination. Virus Genes. 1990 Feb;3(3):251-8. PubMed PMID: 2161159.
		Wilson JM, Danos O, Grossman M, Raulet DH, Mulligan RC. Expression of human adenosine deaminase in mice reconstituted with retrovirus-transduced hematopoietic stem cells. Proc Natl Acad Sci U S A. 1990 Jan;87(1):439-43. PubMed PMID: 2296599; PubMed Central PMCID: PMC53279.
		Martinelli SC, Goff SP. Rapid reversion of a deletion mutation in Moloney murine leukemia virus by recombination with a closely related endogenous provirus. Virology. 1990 Jan;174(1):135-44. PubMed PMID: 2294637.
		Doolittle RF, Feng DF, McClure MA, Johnson MS. Retrovirus phylogeny and evolution. Curr Top Microbiol Immunol. 1990;1-18. Review. PubMed PMID: 2203607.
		Scadden DT, Fuller B, Cunningham JM. Human cells infected with retrovirus vectors acquire an endogenous murine provirus. J Virol. 1990 Jan;64(1):424-7. PubMed PMID: 2152828; PubMed Central PMCID: PMC249120.
		Krieg AM, Gause WC, Gourley MF, Steinberg AD. A role for endogenous retroviral sequences in the regulation of lymphocyte activation. J Immunol. 1989 Oct 15;143(8):2448-51. PubMed PMID: 2477442.
		Policastro PF, Fredholm M, Wilson MC. Truncated gag products encoded by Gv-1-responsive endogenous retrovirus loci. J Virol. 1989 Oct;63(10):4136-47. PubMed PMID: 2789292; PubMed Central PMCID: PMC251027.
		Contag CH, Plagemann PG. Age-dependent poliomyelitis of mice: expression of endogenous retrovirus correlates with cytocidal replication of lactate dehydrogenase-elevating virus in motor neurons. J Virol. 1989 Oct;63(10):4362-9. PubMed PMID: 2550670; PubMed Central PMCID: PMC251053.
		Purcell DF, Deacon NJ, McKenzie IF. The human non-lineage antigen CD46 (HuLy-m5) and primate retroviral gp70 molecules share protein-defined antigenic determinants. Immunol Cell Biol. 1989 Oct;67 ( Pt 5):279-89. PubMed PMID: 2482250.
		Capel B, Mintz B. Neonatal W-mutant mice are favorable hosts for tracking development of marked hematopoietic stem cells. Exp Hematol. 1989 Sep;17(8):872-6. PubMed PMID: 2569983.
		Furuta Y, Aizawa S, Suda Y, Ikawa Y, Kishimoto H, Asano Y, Tada T, Hikikoshi A, Yoshida M, Seiki M. Thymic atrophy characteristic in transgenic mice that harbor pX genes of human T-cell leukemia virus type I. J Virol. 1989 Jul;63(7):3185-9. PubMed PMID: 2724422; PubMed Central PMCID: PMC250880.
		Traversari C, Carbone G, Della Torre G, Bergomi M, Parmiani G, Sensi M. Expression of retrovirus-related, cytotoxic T lymphocyte- and transplantation-defined antigens in NIH/3T3 transfectants after a single passage in nude mice. J Immunol. 1989 Apr 15;142(8):2887-94. PubMed PMID: 2784817.
		Krieg AM, Khan AS, Steinberg AD. Expression of an endogenous retroviral transcript is associated with murine lupus. Arthritis Rheum. 1989 Mar;32(3):322-9. PubMed PMID: 2539166.
		Anderson GR, Stoler DL, Scarcello LA. Retrotransposon-like VL30 elements are efficiently induced in anoxic rat fibroblasts. J Mol Biol. 1989 Feb 20;205(4):765-9. PubMed PMID: 2467007.
		Kerr WG, Nolan GP, Herzenberg LA. In situ detection of transcriptionally active chromatin and genetic regulatory elements in individual viable mammalian cells. Immunol Suppl. 1989;74-8; discussion 79. PubMed PMID: 2807403.
		Shibamura S, Kai K, Akatsuka T, Odaka T. Biochemical and immunological characterization of murine leukemia viruses that are paralysis-inducing in rats. Jpn J Cancer Res. 1989 Jan;80(1):24-30. PubMed PMID: 2540131.
		Shih A, Misra R, Rush MG. Detection of multiple, novel reverse transcriptase coding sequences in human nucleic acids: relation to primate retroviruses. J Virol. 1989 Jan;63(1):64-75. PubMed PMID: 2462064; PubMed Central PMCID: PMC247658.
		Hatzoglou M, Park E, Wynshaw-Boris A, Kaung HL, Hanson RW. Hormonal regulation of chimeric genes containing the phosphoenolpyruvate carboxykinase promoter regulatory region in hepatoma cells infected by murine retroviruses. J Biol Chem. 1988 Nov 25;263(33):17798-808. PubMed PMID: 2846579.
		Contag CH, Plagemann PG. Susceptibility of C58 mice to paralytic disease induced by lactate dehydrogenase-elevating virus correlates with increased expression of endogenous retrovirus in motor neurons. Microb Pathog. 1988 Oct;5(4):287-96. PubMed PMID: 3237056.
		Stoye JP, Fenner S, Greenoak GE, Moran C, Coffin JM. Role of endogenous retroviruses as mutagens: the hairless mutation of mice. Cell. 1988 Jul 29;54(3):383-91. PubMed PMID: 2840205.
		Primi D, Clynes RA, Jouvin-Marche E, Marolleau JP, Barbier E, Cazenave PA, Marcu KB. Rearrangement and expression of T cell receptor and immunoglobulin loci in immortalized CD4-CD8- T cell lines. Eur J Immunol. 1988 Jul;18(7):1101-9. PubMed PMID: 2969819.
		Overbaugh J, Riedel N, Hoover EA, Mullins JI. Transduction of endogenous envelope genes by feline leukaemia virus in vitro. Nature. 1988 Apr 21;332(6166):731-4. PubMed PMID: 2895894.
		Strauss PG, Schmidt J, Pedersen L, Erfle V. Amplification of endogenous proviral MuLV sequences in radiation-induced osteosarcomas. Int J Cancer. 1988 Apr 15;41(4):616-21. PubMed PMID: 2833453.
		Yanagawa S, Murakami A, Hoshino M, Tanaka H. Structural and functional analysis of long terminal repeats of Suncus murinus mammary tumor virus. J Virol. 1988 Apr;62(4):1235-42. Erratum in: J Virol 1988 Jul;62(7):2530. PubMed PMID: 2831384; PubMed Central PMCID: PMC253132.
		Van der Rauwelaert E, Maisin JR, Merregaert J. Provirus integration and myc amplification in 90Sr induced osteosarcomas of CF1 mice. Oncogene. 1988 Mar;2(3):215-22. PubMed PMID: 2832803.
		Schmidt J, Luz A, Erfle V. Endogenous murine leukemia viruses: frequency of radiation-activation and novel pathogenic effects of viral isolates. Leuk Res. 1988;12(5):393-403. PubMed PMID: 3379973.
		Buckheit RW Jr, Liberman SN, Bolognesi DP, Weinhold KJ. The effects of leukemosuppressive immunotherapy on thymic infectious cell centers in AKR mice. Thymus. 1988-1989;12(3):143-56. PubMed PMID: 3266951.
		Johnson GR. Recombinant retrovirus-mediated gene transfer to normal haemopoietic cells. J Cell Sci Suppl. 1988;131-44. PubMed PMID: 3077933.
		Niwa O, Saigusa T, Ikushima T, Sugahara T. Activation of endogeneous retroviruses in mouse cells by thermal neutrons. Int J Radiat Biol Relat Stud Phys Chem Med. 1987 Dec;52(6):949-56. PubMed PMID: 3500932.
		Irons RD, Stillman WS, Cloyd MW. Selective activation of endogenous ecotropic retrovirus in hematopoietic tissues of B6C3F1 mice during the preleukemic phase of 1,3-butadiene exposure. Virology. 1987 Dec;161(2):457-62. PubMed PMID: 2825417.
		Berleth T, Nobis P, Jaenisch R, Harbers K. Activation of endogenous retroviral genomes in Mov strains of mice. J Gen Virol. 1987 Nov;68 ( Pt 11):2919-23. PubMed PMID: 3681267.
		Colicelli J, Goff SP. Identification of endogenous retroviral sequences as potential donors for recombinational repair of mutant retroviruses: positions of crossover points. Virology. 1987 Oct;160(2):518-22. PubMed PMID: 3660592.
		Wilson LD, Flyer DC, Faller DV. Murine retroviruses control class I major histocompatibility antigen gene expression via a trans effect at the transcriptional level. Mol Cell Biol. 1987 Jul;7(7):2406-15. PubMed PMID: 2441241; PubMed Central PMCID: PMC365372.
		King SR, Horowitz JM, Risser R. Nucleotide conservation of endogenous ecotropic murine leukemia proviruses in inbred mice: implications for viral origin and dispersal. Virology. 1987 Apr;157(2):543-7. PubMed PMID: 3029987.
		Portis JL, McAtee FJ, Hayes SF. Horizontal transmission of murine retroviruses. J Virol. 1987 Apr;61(4):1037-44. PubMed PMID: 3029398; PubMed Central PMCID: PMC254060.
		Thayer RM, Power MD, Bryant ML, Gardner MB, Barr PJ, Luciw PA. Sequence relationships of type D retroviruses which cause simian acquired immunodeficiency syndrome. Virology. 1987 Apr;157(2):317-29. PubMed PMID: 2435057.
		Yang JN, Boyd RT, Gottlieb PD, Dudley JP. The endogenous retrovirus Mtv-8 on mouse chromosome 6 maps near several kappa light chain markers. Immunogenetics. 1987;25(4):222-7. PubMed PMID: 3032783.
		Arrigo S, Yun M, Beemon K. cis-acting regulatory elements within gag genes of avian retroviruses. Mol Cell Biol. 1987 Jan;7(1):388-97. PubMed PMID: 3031470; PubMed Central PMCID: PMC365080.
		Colombo MP, Jaenisch R, Wettstein PJ. Endogenous retroviruses lead to the expression of a histocompatibility antigen detectable by skin graft rejection. Proc Natl Acad Sci U S A. 1987 Jan;84(1):189-93. PubMed PMID: 2948187; PubMed Central PMCID: PMC304168.
		Conklin KF, Groudine M. Varied interactions between proviruses and adjacent host chromatin. Mol Cell Biol. 1986 Nov;6(11):3999-4007. PubMed PMID: 3025623; PubMed Central PMCID: PMC367164.
		May FE, Westley BR. Structure of a human retroviral sequence related to mouse mammary tumor virus. J Virol. 1986 Nov;60(2):743-9. PubMed PMID: 3022006; PubMed Central PMCID: PMC288949.
		Ono M, Yasunaga T, Miyata T, Ushikubo H. Nucleotide sequence of human endogenous retrovirus genome related to the mouse mammary tumor virus genome. J Virol. 1986 Nov;60(2):589-98. PubMed PMID: 3021993; PubMed Central PMCID: PMC288930.
		Moshier JA, Luk GD, Huang RC. mRNA from human colon tumor and mucosa related to the pol gene of an endogenous A-type retrovirus. Biochem Biophys Res Commun. 1986 Sep 30;139(3):1071-7. PubMed PMID: 3021147.
		Irons RD, Smith CN, Stillman WS, Shah RS, Steinhagen WH, Leiderman LJ. Macrocytic-megaloblastic anemia in male NIH Swiss mice following repeated exposure to 1,3-butadiene. Toxicol Appl Pharmacol. 1986 Sep 30;85(3):450-5. PubMed PMID: 3020740.
		Ymer S, Young IG. Homology between IgE-binding factor gene and endogenous retroviruses. Nature. 1986 Sep 11-17;323(6084):186. PubMed PMID: 2944003.
		Barker CS, Pickel J, Tainsky M, Hunter E. Molecular cloning of the Mason-Pfizer monkey virus genome: biological characterization of genome length clones and molecular comparisons to other retroviruses. Virology. 1986 Sep;153(2):201-14. PubMed PMID: 3016990.
		Galiay M, Legrand F, Astier-Gin T, Rollet C, Guillemain B, Duplan JF. Induction of thymic lymphosarcomas in C57BL/6 mice after inoculation of weakly oncogenic viruses associated with a sub-leukemogenic radiation exposure (1.75 Gy x 2). Int J Cancer. 1986 Aug 15;38(2):223-8. PubMed PMID: 3755422.
		Basolo F, Toniolo A, Bistocchi M, Fontanini G, Squartini F. Reciprocal interference between milk-transmitted mammary tumor virus and Friend leukemia viruses in mice: possible role of the interferon system. Cancer Res. 1986 Aug;46(8):4064-70. PubMed PMID: 2425940.
		Williams DA, Orkin SH, Mulligan RC. Retrovirus-mediated transfer of human adenosine deaminase gene sequences into cells in culture and into murine hematopoietic cells in vivo. Proc Natl Acad Sci U S A. 1986 Apr;83(8):2566-70. PubMed PMID: 3458218; PubMed Central PMCID: PMC323339.
		Hsiao WL, Gattoni-Celli S, Weinstein IB. Effects of 5-azacytidine on expression of endogenous retrovirus-related sequences in C3H 10T1/2 cells. J Virol. 1986 Mar;57(3):1119-26. PubMed PMID: 2419582; PubMed Central PMCID: PMC252846.
		Pedersen FS, Etzerodt M. Structure of endogenous retroviruses expressed in radiation-induced and spontaneous murine bone tumours. Leuk Res. 1986;10(7):923-30. PubMed PMID: 3736116.
		Erfle V, Schmidt J, Strauss GP, Hehlmann R, Luz A. Activation and biological properties of endogenous retroviruses in radiation osteosarcomagenesis. Leuk Res. 1986;10(7):905-13. PubMed PMID: 3461225.
		Merregaert J, Michiels L, van der Rauwelaert E, Lommel M, Gol-Winkler R, Janowski M. Oncogene involvement in radiation- and virus-induced mouse osteosarcomas. Leuk Res. 1986;10(7):915-21. PubMed PMID: 3016418.
		Korokhov NP, Pyrinova GB, Kurtsman MIa, Tomsons VP, Salganik RI. [Nature of the endogenous retrovirus-like particles of the rat liver]. Eksp Onkol. 1986;8(2):29-32. Russian. PubMed PMID: 2421998.
		Tooze J. Blocked coated pits in AtT20 cells result from endocytosis of budding retrovirions. J Cell Biol. 1985 Nov;101(5 Pt 1):1713-23. PubMed PMID: 2865267; PubMed Central PMCID: PMC2113951.
		Tooze J, Tooze S, Haisma H, Hilgers J. AtT20 pituitary tumour cells contain mouse mammary tumour virus and intracisternal A-type particles in addition to murine leukemia virus. Eur J Cell Biol. 1985 Nov;39(1):224-31. PubMed PMID: 2417843.
		Cianciolo GJ, Copeland TD, Oroszlan S, Snyderman R. Inhibition of lymphocyte proliferation by a synthetic peptide homologous to retroviral envelope proteins. Science. 1985 Oct 25;230(4724):453-5. PubMed PMID: 2996136.
		Salganik RI, Tomsons VP, Pyrinova GB, Korokhov NP, Kiseleva EV, Khristolyubova NB. Reverse transcriptase of rat liver associated with the endogenous retrovirus related to the mouse intracisternal A-particles. Biochem Biophys Res Commun. 1985 Aug 30;131(1):492-9. PubMed PMID: 2412555.
		Yokoro K. [Recent findings on the mechanism of murine T-cell lymphomagenesis]. Gan To Kagaku Ryoho. 1985 Jun;12(6):1181-8. Review. Japanese. PubMed PMID: 3890758.
		Nikbakht KN, Ou CY, Boone LR, Glover PL, Yang WK. Nucleotide sequence analysis of endogenous murine leukemia virus-related proviral clones reveals primer-binding sites for glutamine tRNA. J Virol. 1985 Jun;54(3):889-93. PubMed PMID: 2987543; PubMed Central PMCID: PMC254883.
		Levy DE, Lerner RA, Wilson MC. The Gv-1 locus coordinately regulates the expression of multiple endogenous murine retroviruses. Cell. 1985 May;41(1):289-99. PubMed PMID: 3995585.
		Tilkin AF, B√®gue B, Gomard E, Levy JP. Natural suppressor cell inhibiting T killer responses against retroviruses: a model for self tolerance. J Immunol. 1985 Apr;134(4):2779-82. PubMed PMID: 3156190.
		Schwartzberg P, Colicelli J, Goff SP. Recombination between a defective retrovirus and homologous sequences in host DNA: reversion by patch repair. J Virol. 1985 Mar;53(3):719-26. PubMed PMID: 2983084; PubMed Central PMCID: PMC254699.
		Ball JK, Arthur LO, Dekaban GA. The involvement of a type-B retrovirus in the induction of thymic lymphomas. Virology. 1985 Jan 15;140(1):159-72. PubMed PMID: 2981451.
		Stoye JP, Moroni C. Proliferation and differentiation requirements for the induction of two retroviral loci during B-cell activation. J Gen Virol. 1985 Jan;66 ( Pt 1):109-20. PubMed PMID: 3871472.
		Gallahan D, Robbins J, Byrd L, Callahan R. The genetic stability of endogenous type B and C retroviruses in BALB/c sublines. Curr Top Microbiol Immunol. 1985;89-94. PubMed PMID: 2994959.
		Drescher B, M√∂hring R, Winkler J, Nyakatura G, Rosenthal S. Partial sequence homology between retroviruses of various species in the C-terminal part of the env gene. Folia Biol (Praha). 1985;31(2):93-106. PubMed PMID: 2991031.
		Schmidt J, Erfle V, M√ºller WA. Activation of endogenous C-type retroviral genomes by internal alpha-irradiation of mice with 224Radium. Radiat Environ Biophys. 1985;24(1):17-25. PubMed PMID: 2983362.
		Ulrich K, Nex√∏ BA. Spontaneous expression of C-type virus in DBA/2 mice is associated with an increased rate of mortality, independent of neoplastic disease. J Virol. 1985 Jan;53(1):273-8. PubMed PMID: 2981347; PubMed Central PMCID: PMC255029.
		Georgiev GP. Mobile genetic elements in animal cells and their biological significance. Eur J Biochem. 1984 Dec 3;145(2):203-20. Review. PubMed PMID: 6209137.
		Schwarz H, Thiel HJ, Weinhold KJ, Bolognesi DP, Sch√§fer W. [Stimulation of immunoreactivity against endogenous retroviruses and protection against leukemia in aged AKR mice after vaccination with antibodies to viral surface components. The role of antibodies to p15(E)]. Z Naturforsch C. 1984 Nov-Dec;39(11-12):1199-202. German. PubMed PMID: 6531950.
		Wahlstr√∂m T, Nieminen P, N√§rv√§nen A, Suni J, Lehtovirta P, Saksela E, Vaheri A. Monoclonal antibody defining a human syncytiotrophoblastic polypeptide immunologically related to mammalian retrovirus structural protein p30. Placenta. 1984 Nov-Dec;5(6):465-73. PubMed PMID: 6527980.
		Dekaban GA, Ball JK, Robey WG, Arthur LO, McCarter JA. Molecular biological characterization of a highly leukaemogenic virus isolated from the mouse. IV. Viral proteins. J Gen Virol. 1984 Oct;65 ( Pt 10):1791-802. PubMed PMID: 6208318.
		Rein A, Schultz A. Different recombinant murine leukemia viruses use different cell surface receptors. Virology. 1984 Jul 15;136(1):144-52. PubMed PMID: 6330990.
		Stoye JP, Moroni C. Phenotypic mixing of retroviruses in mitogen-stimulated lymphocytes: analysis of xenotropic and defective endogenous mouse viruses. J Gen Virol. 1984 Feb;65 ( Pt 2):317-26. PubMed PMID: 6319577.
		Markenson JA, Snyder HW Jr. Reactivity of antisera to endogenous primate retrovirus with a human T cell membrane protein: recognition of a nonviral glycoprotein by antibodies directed only against carbohydrate components. J Immunol. 1984 Feb;132(2):772-9. PubMed PMID: 6197475.
		Thornton DH, Nicholas RA. The hazards of retroviruses associated with monoclonal antibody production. Dev Biol Stand. 1984;9-12. PubMed PMID: 6526154.
		Chieco-Bianchi L, Aldovini A, Ronchese F, De Rossi A, Majone F, Montaldi A, Levis AG. Short- and long-term studies on chemical carcinogenesis in BALB/Mo mice. Toxicol Pathol. 1984;12(4):361-8. PubMed PMID: 6335923.
		Sumiyoshi Y, Nishikawa T, Watanabe T, Kano K. Inhibition of retrovirus RNA-dependent DNA polymerase by novobiocin and nalidixic acid. J Gen Virol. 1983 Oct;64 (Pt 10):2329-33. PubMed PMID: 6311959.
		Boone LR, Myer FE, Yang DM, Ou CY, Koh CK, Roberson LE, Tennant RW, Yang WK. Reversal of Fv-1 host range by in vitro restriction endonuclease fragment exchange between molecular clones of N-tropic and B-tropic murine leukemia virus genomes. J Virol. 1983 Oct;48(1):110-9. PubMed PMID: 6310140; PubMed Central PMCID: PMC255327.
		Mowat M, Bernstein A. Linkage of the Fv-2 gene to a newly reinserted ecotropic retrovirus in Fv-2 congenic mice. J Virol. 1983 Sep;47(3):471-7. PubMed PMID: 6620461; PubMed Central PMCID: PMC255288.
		Tralka TS, Yee CL, Rabson AB, Wivel NA, Stromberg KJ, Rabson AS, Costa JC. Murine type C retroviruses and intracisternal A-particles in human tumors serially passaged in nude mice. J Natl Cancer Inst. 1983 Sep;71(3):591-9. PubMed PMID: 6310201.
		Itin A, Keshet E. Apparent recombinants between virus-liKE (VL30) and murine leukemia virus-related sequences in mouse DNA. J Virol. 1983 Jul;47(1):178-84. PubMed PMID: 6306271; PubMed Central PMCID: PMC255222.
		Greenberger JS, Eckner RJ, Sakakeeny M, Marks P, Reid D, Nabel G, Hapel A, Ihle JN, Humphries KC. Interleukin 3-dependent hematopoietic progenitor cell lines. Fed Proc. 1983 Jul;42(10):2762-71. PubMed PMID: 6305732.
		O'Brien SJ, Bonner TI, Cohen M, O'Connell C, Nash WG. Mapping of an endogenous retroviral sequence to human chromosome 18. Nature. 1983 May 5-11;303(5912):74-7. PubMed PMID: 6843662.
		Stoye JP, Moroni C. Endogenous retrovirus expression in stimulated murine lymphocytes. Identification of a new locus controlling mitogen induction of a defective virus. J Exp Med. 1983 May 1;157(5):1660-74. PubMed PMID: 6189943; PubMed Central PMCID: PMC2187009.
		Liou RS, Boone LR, Kiggans JO, Yang DM, Wang TW, Tennant RW, Yang WK. Molecular cloning and analysis of the endogenous retrovirus chemically induced from RFM/Un mouse cell cultures. J Virol. 1983 Apr;46(1):288-92. PubMed PMID: 6827652; PubMed Central PMCID: PMC255120.
		Nex√∏ BA, Ulrich K. Variants of type-C retroviruses from DBA/2 mice: protein-structural and biological properties. Virology. 1983 Mar;125(2):454-67. PubMed PMID: 6836917.
		Sarma PS, Rowe WP. Mouse immunoglobulin antibodies require complement for neutralization of mouse retroviruses. J Virol. 1983 Mar;45(3):956-60. PubMed PMID: 6300466; PubMed Central PMCID: PMC256501.
		Sher T, Haas M, Feldman M. Elimination of endogenous xenotropic retroviruses from peritoneal macrophages in virus-induced T cell lymphoma. J Gen Virol. 1983 Feb;64 (Pt 2):421-4. PubMed PMID: 6601179.
		Rassart E, Sankar-Mistry P, Lemay G, DesGroseillers L, Jolicoeur P. New class of leukemogenic ecotropic recombinant murine leukemia virus isolated from radiation-induced thymomas of C57BL/6 mice. J Virol. 1983 Feb;45(2):565-75. PubMed PMID: 6300420; PubMed Central PMCID: PMC256450.
		Ganguly K, Kalyanaraman VS, Sarngadharan MG. Cell surface receptors for ecotropic murine viruses are different from those for xenotropic and amphotropic viruses. Intervirology. 1983;19(4):224-9. PubMed PMID: 6305872.
		Goldschmied-Reouven A, Yaniv A, Hizi A. Hamster endogenous retrovirus (HaER)--distinct properties of structural proteins and DNA polymerase. Arch Virol. 1983;78(3-4):245-53. PubMed PMID: 6197953.
		Goldschmied-Reouven A, Yaniv A, Perk K. Hamster endogenous retrovirus (HaER) isolated from SV-40 induced tumor cells. Arch Virol. 1983;78(3-4):233-44. PubMed PMID: 6197952.
		Rasheed S. Role of endogenous cat retrovirus in cell differentiation. Proc Natl Acad Sci U S A. 1982 Dec;79(23):7371-5. PubMed PMID: 6961415; PubMed Central PMCID: PMC347341.
		Schmidt J, Erfle V. [Retrovirus activating potential of nuclear polyhedrosis viruses in mammalian cell cultures]. Zentralbl Bakteriol Mikrobiol Hyg A. 1982 Sep;252(4):438-55. German. PubMed PMID: 6295023.
		Rein A, Rice N, Simek S, Cohen M, Mural RJ. In situ hybridization: general infectivity assay for retroviruses. J Virol. 1982 Sep;43(3):1055-60. PubMed PMID: 6292448; PubMed Central PMCID: PMC256217.
		Moore JL, Chan HW. Identification of ecotropic proviral sequences in high- and low-ecotropic-virus-producing mouse strains. J Virol. 1982 Sep;43(3):1038-45. PubMed PMID: 6292447; PubMed Central PMCID: PMC256215.
		Keshet E, Itin A. Patterns of genomic distribution and sequence heterogeneity of a murine "retrovirus-like" multigene family. J Virol. 1982 Jul;43(1):50-8. PubMed PMID: 6287016; PubMed Central PMCID: PMC256095.
		Astier T, Guillemain B, Laigret F, Mamoun R, Duplan JF. Serological Characterization of C-type retroviruses endogenous to the C57BL/6 mouse and isolated in tumours induced by radiation leukaemia virus (RadLV-Rs). J Gen Virol. 1982 Jul;61 (Pt l):55-63. PubMed PMID: 6181187.
		Peters G, Smith R, Brookes S, Dickson C. Conservation of protein coding potential in the long terminal repeats of exogenous and endogenous mouse mammary tumor viruses. J Virol. 1982 Jun;42(3):880-8. PubMed PMID: 6285002; PubMed Central PMCID: PMC256922.
		De Rossi A, D'Andrea E, Chieco-Bianchi L. Characterization of dualtropic type C retroviruses isolated from spontaneous non-T lymphomas of SJL/J(V+) mice. Tumori. 1982 Apr 30;68(2):95-104. PubMed PMID: 6181593.
		Cohen M, Rice N, Stephens R, O'Connell C. DNA sequence relationship of the baboon endogenous virus genome to the genomes of other type C and type D retroviruses. J Virol. 1982 Mar;41(3):801-12. PubMed PMID: 6284972; PubMed Central PMCID: PMC256817.
		Kozak CA, Rowe WP. Genetic mapping of ecotropic murine leukemia virus-inducing loci in six inbred strains. J Exp Med. 1982 Feb 1;155(2):524-34. PubMed PMID: 6276492; PubMed Central PMCID: PMC2186586.
		Weiss RA. Perspectives on endogenous retroviruses in normal and pathological growth. Curr Top Microbiol Immunol. 1982;127-32. PubMed PMID: 7083906.
		Schmidt M, Horak I, Wecker E. In vitro differentiation of F-9 teratocarcinoma cells does not induce expression of endogenous retroviral glycoprotein. J Cell Physiol Suppl. 1982;97-105. PubMed PMID: 6302113.
		Steffen DL, Robinson H. Endogenous retroviruses of mice and chickens. Curr Top Microbiol Immunol. 1982;1-10. Review. PubMed PMID: 6282536.
		Chumakov IM, Zabarovsky ER, Prassolov VS, Mett VL, Kisselev LL. Human nucleotide sequences related to the transforming gene of a murine sarcoma virus: studies with cloned viral and cellular DNAs. Gene. 1982 Jan;17(1):19-26. PubMed PMID: 6281133.
		Izui S, Fernandes G, Hara I, McConahey PJ, Jensen FC, Dixon FJ, Good RA. Low-calorie diet selectively reduces expression of retroviral envelope glycoprotein gp70 in sera of NZB x NZW F1 hybrid mice. J Exp Med. 1981 Oct 1;154(4):1116-24. PubMed PMID: 7288364; PubMed Central PMCID: PMC2186485.
		Stuhlmann H, J√§hner D, Jaenisch R. Infectivity and methylation of retroviral genomes is correlated with expression in the animal. Cell. 1981 Oct;26(2 Pt 2):221-32. PubMed PMID: 6277495.
		Legrand E, Daculsi R, Bach JF, Duplan JF. Influence of serum thymic factor (FTS) on radiation-induced leukaemogenesis in thymectomized AKR mice. Int J Cancer. 1981 Jul 15;28(1):59-64. PubMed PMID: 7198101.
		Dolberg D, Fan H. Further characterization of virus-like 30S (VL30) RNA of mice: initiation of reverse transcription and intracellular synthesis. J Gen Virol. 1981 Jun;54(Pt 2):281-91. PubMed PMID: 6169792.
		Cole MD, Ono M, Huang RC. Terminally redundant sequences in cellular intracisternal A-particle genes. J Virol. 1981 May;38(2):680-7. PubMed PMID: 7241664; PubMed Central PMCID: PMC171198.
		Thiry L, Sprecher-Goldberger S, Hard RC, Bossens M, Neuray F. Expression of retrovirus-related antigen in pregnancy. I. Antigens cross-reacting with simian retroviruses in human foetal tissues and cord blood lymphocytes. J Reprod Immunol. 1981 Mar;2(6):309-22. PubMed PMID: 7218220.
		Erfle V, Hehlmann R, Schetters H, Schmidt J, Luz A. Radiation-induced murine leukemias and endogenous retroviruses: the time course of viral expression. Haematol Blood Transfus. 1981;537-40. PubMed PMID: 6947939.
		Mazurenko NP, Merekalova ZI, Pavlish OA, Bykovsky AF, Kurzman MJ, Mazurenko NN. In vitro studies of a co-carcinogenic effect of vaccinia and herpes group viruses. Neoplasma. 1981;28(4):403-12. PubMed PMID: 6270580.
		Keshet E, Shaul Y. Terminal direct repeats in a retrovirus-like repeated mouse gene family. Nature. 1981 Jan 1;289(5793):83-5. PubMed PMID: 6256651.
		Hovanessian AG, Barr√©-Sinoussi F, Montagnier L. Interferon-mediated protein kinase in mouse cells treated with iododeoxyuridine (IdUrd) and induced to express endogenous retroviruses. J Gen Virol. 1981 Jan;52(Pt 1):199-204. PubMed PMID: 6167665.
		Georgiev GP, Il'in IuV, Ryskov AP, Kramerov DA. [Mobile dispersed genetic elements in eukaryotes and their possible relationship to carcinogenesis]. Genetika. 1981;17(2):222-32. Russian. PubMed PMID: 6164600.
		Zielinski CC, Waksal SD, Tempelis LD, Khiroya RH, Schwartz RS. Surface phenotypes in T-cell leukaemia are determined by oncogenic retroviruses. Nature. 1980 Dec 4;288(5790):489-91. PubMed PMID: 6255335.
		Weinberg RA. Origins and roles of endogenous retroviruses. Cell. 1980 Dec;22(3):643-4. PubMed PMID: 7460007.
		Kozak CA, Rowe WP. Genetic mapping of the ecotropic virus-inducing locus Akv-2 of the AKR mouse. J Exp Med. 1980 Nov 1;152(5):1419-23. PubMed PMID: 6933208; PubMed Central PMCID: PMC2185990.
		Spriggs DR, Krueger RG. BALB/c myeloma retroviruses: peptide mapping and immunological analysis of the pp12 structural protein. J Virol. 1980 Nov;36(2):533-40. PubMed PMID: 6159483; PubMed Central PMCID: PMC353671.
		Rassart E, Jolicoeur P. Restriction endonuclease mapping of unintegrated viral DNA of B- and N-tropic BALB/c murine leukemia virus. J Virol. 1980 Sep;35(3):812-23. PubMed PMID: 6252340; PubMed Central PMCID: PMC288875.
		Erfle V, Hehlmann R, Schetters H, Meier A, Luz A. Time course of C-type retrovirus expression in mice submitted to osteosarcomagenic doses of 224radium. Int J Cancer. 1980 Jul 15;26(1):107-13. PubMed PMID: 6263802.
		Pincus T. Late-passage SC-1 cells resistant to N- and B-tropic viruses but sensitive to NB-tropic viruses. J Virol. 1980 Jun;34(3):711-5. PubMed PMID: 6155476; PubMed Central PMCID: PMC288760.
		Gautsch JW, Knowles AF, Jensen FC, Kaplan NO. Highly efficient induction of type C retroviruses by a human tumor in athymic mice. Proc Natl Acad Sci U S A. 1980 Apr;77(4):2247-50. PubMed PMID: 6246530; PubMed Central PMCID: PMC348690.
		Ellis RW, Stockert E, Fleissner E. Association of endogenous retroviruses with radiation-induced leukemias of BALB/c mice. J Virol. 1980 Feb;33(2):652-60. PubMed PMID: 6157834; PubMed Central PMCID: PMC288589.
		Denner J, Wunderlich V, Bierwolf D. Suppression of human lymphocyte mitogen response by disrupted primate retroviruses of type C (baboon endogenous virus) and type D (PMFV). Acta Biol Med Ger. 1980;39(11-12):K19-26. PubMed PMID: 6264718.
		Ogura H. Interactions among retroviruses Mason-Pfizer monkey, baboon endogenous, simian sarcoma virus-associated and murine leukemia detected by virus-mediated cell fusion inhibition assay. Microbiol Immunol. 1980;24(8):761-3. PubMed PMID: 6252418.
		Rapp UR, Todaro GJ. Generation of oncogenic mouse type C viruses: in vitro selection of carcinoma-inducing variants. Proc Natl Acad Sci U S A. 1980 Jan;77(1):624-8. PubMed PMID: 6244570; PubMed Central PMCID: PMC348327.
		Tsichlis PN, Conklin KF, Coffin JM. Mutant and recombinant avian retroviruses with extended host range. Proc Natl Acad Sci U S A. 1980 Jan;77(1):536-40. PubMed PMID: 6244565; PubMed Central PMCID: PMC348307.
		Dahlberg JE, Tronick SR, Aaronson SA. Immunological relationships of an endogenous guinea pig retrovirus with prototype mammalian type B and type D retroviruses. J Virol. 1980 Jan;33(1):522-30. PubMed PMID: 6154150; PubMed Central PMCID: PMC288566.
		Kominami R, Hatanaka M. Conserved region of mammalian retrovirus RNA. J Virol. 1979 Dec;32(3):925-33. PubMed PMID: 229272; PubMed Central PMCID: PMC525941.
		Astrin SM, Buss EG, Haywards WS. Endogenous viral genes are non-essential in the chicken. Nature. 1979 Nov 15;282(5736):339-41. PubMed PMID: 228201.
		Cohen JC, Majors JE, Varmus HE. Organization of mouse mammary tumor virus-specific DNA endogenous to BALB/c mice. J Virol. 1979 Nov;32(2):483-96. PubMed PMID: 228072; PubMed Central PMCID: PMC353580.
		Ayukawa HM, Saltzburg D, Mukherjee BB. In vivo induction of endogenous retroviruses in BALB/c mouse hepatocytes by successive treatments with carbon tetrachloride and bromodeoxyuridine. Int J Cancer. 1979 Oct 15;24(4):498-503. PubMed PMID: 93580.
		Barr√©-Sinoussi F, Montagnier L, Lidereau R, Sisman J, Wood J, Chermann JC. Enhancement of retrovirus production by anti-interferon serum. Ann Microbiol (Paris). 1979 Oct;130B(3):349-62. PubMed PMID: 93859.
		Bernstein A, Gamble C, Penrose D, Mak TW. Presence and expression of Friend erythroleukemia virus-related sequences in normal and leukemic mouse tissues. Proc Natl Acad Sci U S A. 1979 Sep;76(9):4455-9. PubMed PMID: 291976; PubMed Central PMCID: PMC411595.
		Mukherjee BB, Mobry PM. Selective transcription of genomic sequences common to both N- and X-tropic endogenous retroviruses in BALB/c mouse tissues. J Gen Virol. 1979 Jun;43(3):723-8. PubMed PMID: 225438.
		Robertson DL, Varmus HE. Structural analysis of the intracellular RNAs of murine mammary tumor virus. J Virol. 1979 May;30(2):576-89. PubMed PMID: 224216; PubMed Central PMCID: PMC353361.
		Besmer P, Olshevsky U, Baltimore D, Dolberg D, Fan H. Virus-like 30S RNA in mouse cells. J Virol. 1979 Mar;29(3):1168-76. PubMed PMID: 221671; PubMed Central PMCID: PMC353277.
		Kuff EL, Lueders KK, Scolnick EM. Nucleotide sequence relationship between intracisternal type A particles of Mus musculus and an endogenous retrovirus (M432) of Mus cervicolor. J Virol. 1978 Oct;28(1):66-74. PubMed PMID: 212615; PubMed Central PMCID: PMC354248.
		Elder JH, Gautsch JW, Jensen FC, Lerner RA. Multigene family of endogenous retroviruses: recombinant origin of diversity. J Natl Cancer Inst. 1978 Sep;61(3):625-38. PubMed PMID: 80452.
		Jolicoeur P, Rosenberg N, Cotellessa A, Baltimore D. Leukemogenicity of clonal isolates of murine leukemia viruses. J Natl Cancer Inst. 1978 Jun;60(6):1473-6. PubMed PMID: 206713.
		Sherwin SA, Rapp UR, Benveniste RE, Sen A, Todaro GJ. Rescue of endogenous 30S retroviral sequences from mouse cells by baboon type C virus. J Virol. 1978 May;26(2):257-64. PubMed PMID: 207887; PubMed Central PMCID: PMC354063.
Phodopus sungorus	Siberian hamster	Tikhonenko AT, Polotskaya AV, Vassetzky NS 3rd, Golovkina TV, Gudkov AV. Long terminal repeats of dwarf hamster endogenous retrovirus are highly diverged and do not maintain efficient transcription. Virology. 1991 Mar;181(1):367-70. PubMed PMID: 1994585.
Rattus norvegicus	Norway Rat	Baillie GJ, van de Lagemaat LN, Baust C, Mager DL. Multiple groups ofendogenous betaretroviruses in mice, rats, and other mammals. J Virol. 2004Jun;78(11):5784-98. PubMed PMID: 15140976; PubMed Central PMCID: PMC415799.
		Wang Y, Liska F, Gosele C, Sedová L, Kren V, Krenová D, Ivics Z, Hubner N,Izsvák Z. A novel active endogenous retrovirus family contributes to genomevariability in rat inbred strains. Genome Res. 2010 Jan;20(1):19-27. doi:10.1101/gr.100073.109. Epub 2009 Nov 3. PubMed PMID: 19887576; PubMed CentralPMCID: PMC2798827.
Oryzomys palustris	Marsh rice rat	Cantrell MA, Ederer MM, Erickson IK, Swier VJ, Baker RJ, Wichman HA. MysTR: anendogenous retrovirus family in mammals that is undergoing recent amplifications to unprecedented copy numbers. J Virol. 2005 Dec;79(23):14698-707. PubMed PMID:16282470; PubMed Central PMCID: PMC1287555.
Peromyscus maniculatus	North American deer mouse	Cantrell MA, Ederer MM, Erickson IK, Swier VJ, Baker RJ, Wichman HA. MysTR: anendogenous retrovirus family in mammals that is undergoing recent amplifications to unprecedented copy numbers. J Virol. 2005 Dec;79(23):14698-707. PubMed PMID:16282470; PubMed Central PMCID: PMC1287555.
Sigmodon hispidus	Hispid cotton rat	Cantrell MA, Ederer MM, Erickson IK, Swier VJ, Baker RJ, Wichman HA. MysTR: anendogenous retrovirus family in mammals that is undergoing recent amplifications to unprecedented copy numbers. J Virol. 2005 Dec;79(23):14698-707. PubMed PMID:16282470; PubMed Central PMCID: PMC1287555.
Macropus eugenii	Tammar wallaby	Ferreri GC, Brown JD, Obergfell C, Jue N, Finn CE, O'Neill MJ, O'Neill RJ.Recent amplification of the kangaroo endogenous retrovirus, KERV, limited to the centromere. J Virol. 2011 May;85(10):4761-71. doi: 10.1128/JVI.01604-10. Epub2011 Mar 9. PubMed PMID: 21389136; PubMed Central PMCID: PMC3126163.
		Longo MS, Carone DM; NISC Comparative Sequencing Program, Green ED, O'NeillMJ, O'Neill RJ. Distinct retroelement classes define evolutionary breakpointsdemarcating sites of evolutionary novelty. BMC Genomics. 2009 Jul 24;334. doi:10.1186/1471-2164-10-334. PubMed PMID: 19630942; PubMed Central PMCID:PMC2736999.
		Carone DM, Longo MS, Ferreri GC, Hall L, Harris M, Shook N, Bulazel KV, CaroneBR, Obergfell C, O'Neill MJ, O'Neill RJ. A new class of retroviral and satellite encoded small RNAs emanates from mammalian centromeres. Chromosoma. 2009Feb;118(1):113-25. doi: 10.1007/s00412-008-0181-5. Epub 2008 Oct 7. PubMed PMID: 18839199.
Macropus rufogriseus	Red-necked wallaby	Ferreri GC, Brown JD, Obergfell C, Jue N, Finn CE, O'Neill MJ, O'Neill RJ.Recent amplification of the kangaroo endogenous retrovirus, KERV, limited to the centromere. J Virol. 2011 May;85(10):4761-71. doi: 10.1128/JVI.01604-10. Epub2011 Mar 9. PubMed PMID: 21389136; PubMed Central PMCID: PMC3126163.
Suncus murinus	House shrew	Yanagawa S, Murakami A, Hoshino M, Tanaka H. Structural and functional analysis of long terminal repeats of Suncus murinus mammary tumor virus. J Virol. 1988 Apr;62(4):1235-42. Erratum in: J Virol 1988 Jul;62(7):2530. PubMed PMID: 2831384; PubMed Central PMCID: PMC253132.
		Yokoi T, Nakane H, Hayakawa S, Saga S, Nagayoshi S, Tsutsui Y, Aoyama A, Hoshino M, Ono K. Biochemical and immunological characterization of Suncus murinus mammary tumor virus DNA polymerase. Virology. 1986 Jan 30;148(2):268-74. PubMed PMID: 2417416.
Oryctolagus cuniculus	Rabbit	Yap MW, Stoye JP. Apparent effect of rabbit endogenous lentivirus type K acquisition on retrovirus restriction by lagomorph Trim5αs. Philos Trans R Soc Lond B Biol Sci. 2013 Aug 12;368(1626):20120498. doi: 10.1098/rstb.2012.0498. Print 2013 Sep 19. PubMed PMID: 23938750; PubMed Central PMCID: PMC3758185.
		Silva E, Marques S, Osório H, Carvalheira J, Thompson G. Endogenous hepatitis C virus homolog fragments in European rabbit and hare genomes replicate in cell culture. PLoS One. 2012;7(11):e49820. doi: 10.1371/journal.pone.0049820. Epub 2012 Nov 19. PubMed PMID: 23185448; PubMed Central PMCID: PMC3501476.
		Cornelis G, Heidmann O, Bernard-Stoecklin S, Reynaud K, Véron G, Mulot B, Dupressoir A, Heidmann T. Ancestral capture of syncytin-Car1, a fusogenic endogenous retroviral envelope gene involved in placentation and conserved in Carnivora. Proc Natl Acad Sci U S A. 2012 Feb 14;109(7):E432-41. doi: 10.1073/pnas.1115346109. Epub 2012 Jan 17. PubMed PMID: 22308384; PubMed Central PMCID: PMC3289388.
		Dupressoir A, Vernochet C, Harper F, Guégan J, Dessen P, Pierron G, Heidmann T. A pair of co-opted retroviral envelope syncytin genes is required for formation of the two-layered murine placental syncytiotrophoblast. Proc Natl Acad Sci U S A. 2011 Nov 15;108(46):E1164-73. doi: 10.1073/pnas.1112304108. Epub 2011 Oct 27. PubMed PMID: 22032925; PubMed Central PMCID: PMC3219115.
		de Matos AL, van der Loo W, Areal H, Lanning DK, Esteves PJ. Study of Sylvilagus rabbit TRIM5α species-specific domain: how ancient endoviruses could have shaped the antiviral repertoire in Lagomorpha. BMC Evol Biol. 2011 Oct 8;11:294. doi: 10.1186/1471-2148-11-294. PubMed PMID: 21982459; PubMed Central PMCID: PMC3208668.
		Vernochet C, Heidmann O, Dupressoir A, Cornelis G, Dessen P, Catzeflis F, Heidmann T. A syncytin-like endogenous retrovirus envelope gene of the guinea pig specifically expressed in the placenta junctional zone and conserved in Caviomorpha. Placenta. 2011 Nov;32(11):885-92. doi: 10.1016/j.placenta.2011.08.006. Epub 2011 Sep 3. PubMed PMID: 21893339.
		Johal H, Ford C, Glenn W, Heads J, Lawson J, Rawlinson W. Mouse mammary tumor like virus sequences in breast milk from healthy lactating women. Breast Cancer Res Treat. 2011 Aug;129(1):149-55. doi: 10.1007/s10549-011-1421-6. Epub 2011 Mar 2. PubMed PMID: 21365265.
		Fletcher AJ, Hué S, Schaller T, Pillay D, Towers GJ. Hare TRIM5α restricts divergent retroviruses and exhibits significant sequence variation from closely related lagomorpha TRIM5 genes. J Virol. 2010 Dec;84(23):12463-8. doi: 10.1128/JVI.01514-10. Epub 2010 Sep 22. PubMed PMID: 20861252; PubMed Central PMCID: PMC2976397.
		Heidmann O, Vernochet C, Dupressoir A, Heidmann T. Identification of an endogenous retroviral envelope gene with fusogenic activity and placenta-specific expression in the rabbit: a new "syncytin" in a third order of mammals. Retrovirology. 2009 Nov 27;6:107. doi: 10.1186/1742-4690-6-107. PubMed PMID: 19943933; PubMed Central PMCID: PMC2789053.
		van der Loo W, Abrantes J, Esteves PJ. Sharing of endogenous lentiviral gene fragments among leporid lineages separated for more than 12 million years. J Virol. 2009 Mar;83(5):2386-8. doi: 10.1128/JVI.01116-08. Epub 2008 Dec 24. PubMed PMID: 19109386; PubMed Central PMCID: PMC2643718.
		Keckesova Z, Ylinen LM, Towers GJ, Gifford RJ, Katzourakis A. Identification of a RELIK orthologue in the European hare (Lepus europaeus) reveals a minimum age of 12 million years for the lagomorph lentiviruses. Virology. 2009 Feb 5;384(1):7-11. doi: 10.1016/j.virol.2008.10.045. Epub 2008 Dec 13. PubMed PMID: 19070882; PubMed Central PMCID: PMC3556577.
		Katzourakis A, Tristem M, Pybus OG, Gifford RJ. Discovery and analysis of the first endogenous lentivirus. Proc Natl Acad Sci U S A. 2007 Apr 10;104(15):6261-5. Epub 2007 Mar 23. PubMed PMID: 17384150; PubMed Central PMCID: PMC1851024.
		Aleem Khan A, Parveen N, Habeeb MA, Habibullah CM. Journey from hepatocyte transplantation to hepatic stem cells: a novel treatment strategy for liver diseases. Indian J Med Res. 2006 May;123(5):601-14. Review. PubMed PMID: 16873904.
		Böni J, Schüpbach J, Rickenbach M; Swiss HIV Cohort Study. Rabbit retrotransposon sequences undetectable in blood donors and lymphoma patients of the Swiss HIV Cohort Study. AIDS Res Hum Retroviruses. 2006 Jun;22(6):499-500. PubMed PMID: 16796524.
		Piper KE, Hanssen AD, Lewallen DG, Matteson EL, Osmon DR, Duffy MC, Hagan RA, Steckelberg JM, Patel R. Lack of detection of human retrovirus-5 proviral DNA in synovial tissue and blood specimens from individuals with rheumatoid arthritis or osteoarthritis. Arthritis Rheum. 2006 Feb 15;55(1):123-5. PubMed PMID: 16463423; PubMed Central PMCID: PMC1464419.
		Sinkovics JG. A notable phenomenon recapitulated. A fusion product of a murine lymphoma cell and a leukemia virus-neutralizing antibody-producer host plasma cell formed spontaneously and secreting the specific antibody continuously. Acta Microbiol Immunol Hung. 2005;52(1):1-40. PubMed PMID: 15957233.
		Liu WY, Jin ZX, Gu CH, Zhao DE, Tan HM. [Construction and evaluation of the property of decellular porcine aortic valve]. Zhonghua Yi Xue Za Zhi. 2005 Feb 2;85(5):324-7. Chinese. PubMed PMID: 15854509.
		Forsman A, Uzameckis D, Rönnblom L, Baecklund E, Aleskog A, Bindra A, Pipkorn R, Lejniece S, Kozireva S, Murovska M, Blomberg J. Single-tube nested quantitative PCR: a rational and sensitive technique for detection of retroviral DNA. Application to RERV-H/HRV-5 and confirmation of its rabbit origin. J Virol Methods. 2003 Jul;111(1):1-11. PubMed PMID: 12821191.
		Tanaka S, Ikeda H, Otsuka N, Yamamoto Y, Sugaya T, Yoshiki T. Tissue specific high level expression of a full length human endogenous retrovirus genome transgene, HERV-R, under control of its own promoter in rats. Transgenic Res. 2003 Jun;12(3):319-28. PubMed PMID: 12779120.
		Chernukhin IV, Tuzova MN, Degtiareva MM, Gaidul KV, Kozlov VA. Production of Peptide of Retroviral Origin in Sera of Patients with Chronic Myeloid Leukemia at Acute Phase. Russ J Immunol. 1998 Jul;3(2):147-152. PubMed PMID: 12687093.
		Voisset C, Myers RE, Carne A, Kellam P, Griffiths DJ. Rabbit endogenous retrovirus-H encodes a functional protease. J Gen Virol. 2003 Jan;84(Pt 1):215-25. PubMed PMID: 12533718.
		Ikuno Y, Kazlauskas A. An in vivo gene therapy approach for experimental proliferative vitreoretinopathy using the truncated platelet-derived growth factor alpha receptor. Invest Ophthalmol Vis Sci. 2002 Jul;43(7):2406-11. PubMed PMID: 12091444.
		Griffiths DJ, Voisset C, Venables PJ, Weiss RA. Novel endogenous retrovirus in rabbits previously reported as human retrovirus 5. J Virol. 2002 Jul;76(14):7094-102. PubMed PMID: 12072509; PubMed Central PMCID: PMC136318.
		Hiltunen MO, Turunen MP, Ylä-Herttuala S. Gene therapy methods in cardiovascular diseases. Methods Enzymol. 2002;346:311-20. PubMed PMID: 11883076.
		Kozireva S, Lejniece S, Blomberg J, Murovska M. Human retrovirus type 5 sequences in non-Hodgkin's lymphoma of T cell origin. AIDS Res Hum Retroviruses. 2001 Jul 1;17(10):953-6. PubMed PMID: 11461680.
		De las Heras M, Barsky SH, Hasleton P, Wagner M, Larson E, Egan J, Ortin A, Gimenez-Mas JA, Palmarini M, Sharp JM. Evidence for a protein related immunologically to the jaagsiekte sheep retrovirus in some human lung tumours. Eur Respir J. 2000 Aug;16(2):330-2. PubMed PMID: 10968511.
		Murovska M, Lejniece S, Kozireva S, Koulikovska M, Yin H, Blomberg J. Human retrovirus 5 sequences in peripheral blood cells of patients with B-cell non-Hodgkin's lymphoma. Int J Cancer. 2000 Mar 15;85(6):762-70. PubMed PMID: 10709092.
		Griffiths DJ, Venables PJ, Weiss RA, Boyd MT. A novel exogenous retrovirus sequence identified in humans. J Virol. 1997 Apr;71(4):2866-72. PubMed PMID: 9060643; PubMed Central PMCID: PMC191412.
		Stankovic T, Byrd PJ, Cooper PR, McConville CM, Munroe DJ, Riley JH, Watts GD, Ambrose H, McGuire G, Smith AD, Sutcliffe A, Mills T, Taylor AM. Construction of a transcription map around the gene for ataxia telangiectasia: identification of at least four novel genes. Genomics. 1997 Mar 1;40(2):267-76. PubMed PMID: 9119394.
		Nita I, Ghivizzani SC, Galea-Lauri J, Bandara G, Georgescu HI, Robbins PD, Evans CH. Direct gene delivery to synovium. An evaluation of potential vectors in vitro and in vivo. Arthritis Rheum. 1996 May;39(5):820-8. PubMed PMID: 8639179.
		Turbeville MA, Rhodes JC, Hyams DM, Distler CM, Steele PE. Expression of a putative immunosuppressive protein in human tumors and tissues. Pathobiology. 1996;64(5):233-8. PubMed PMID: 9068005.
		Sauter M, Schommer S, Kremmer E, Remberger K, Dölken G, Lemm I, Buck M, Best B, Neumann-Haefelin D, Mueller-Lantzsch N. Human endogenous retrovirus K10: expression of Gag protein and detection of antibodies in patients with seminomas. J Virol. 1995 Jan;69(1):414-21. PubMed PMID: 7983737; PubMed Central PMCID: PMC188589.
		Brookes SM, Pandolfino YA, Mitchell TJ, Venables PJ, Shattles WG, Clark DA, Entwistle A, Maini RN. The immune response to and expression of cross-reactive retroviral gag sequences in autoimmune disease. Br J Rheumatol. 1992 Nov;31(11):735-42. PubMed PMID: 1280512.
		Grossman M, Raper SE, Wilson JM. Towards liver-directed gene therapy: retrovirus-mediated gene transfer into human hepatocytes. Somat Cell Mol Genet. 1991 Nov;17(6):601-7. PubMed PMID: 1767337.
		Iakovleva LA, Timanovskaia VV, Indzhiia LV, Lapin BA, Voevodin AF. [Modelling of malignant lymphoma in rabbits using primate oncogenic viruses. Preliminary report]. Biull Eksp Biol Med. 1987 Mar;103(3):336-8. Russian. PubMed PMID: 2881586.
		Copeland TD, Tsai WP, Oroszlan S. Antibody to a synthetic peptide detects a conserved region of retrovirus transmembrane proteins. Biochem Biophys Res Commun. 1985 Jan 31;126(2):672-7. PubMed PMID: 3977884.
		Derks JP, Hofmans L, Bruning HW, von Rood JJ. Synthesis of a viral protein with molecular weight of 30,000 (p30) by leukemic cells and antibodies cross-reacting with Simian sarcoma virus p30 in serum of a chronic myeloid leukemia patient. Cancer Res. 1982 Feb;42(2):681-6. PubMed PMID: 6173117.
		Huang TT Jr, Calarco PG. Immunoprecipitation of intracisternal A-particle-associated antigens from preimplantation mouse embryos. J Natl Cancer Inst. 1981 Nov;67(5):1129-34. PubMed PMID: 6272013.
		Hart H, McCormick JN, Marmion BP. Viruses and lymphocytes in rheumatoid arthritis. II. Examination of lymphocytes and sera from patients with rheumatoid arthritis for evidence of retrovirus infection. Ann Rheum Dis. 1979 Dec;38(6):514-25. PubMed PMID: 395909; PubMed Central PMCID: PMC1000411.
		Besmer P, Olshevsky U, Baltimore D, Dolberg D, Fan H. Virus-like 30S RNA in mouse cells. J Virol. 1979 Mar;29(3):1168-76. PubMed PMID: 221671; PubMed Central PMCID: PMC353277.
		Witkin SS, Higgins PJ, Bendich A. Inhibition of viral reverse transcriptase and human sperm DNA polymerase by anti-sperm antibodies. Clin Exp Immunol. 1978 Aug;33(2):244-51. PubMed PMID: 82498; PubMed Central PMCID: PMC1537572.
		Marcus SL, Sarkar NH, Modak MJ. Template-specific requirements for DNA synthesis by the Mason-Pfizer monkey virus DNA polymerase: unique aspects. Biochim Biophys Acta. 1978 Jul 24;519(2):317-30. PubMed PMID: 78724.
		Benveniste RE, Callahan R, Sherr CJ, Chapman V, Todaro GJ. Two distinct endogenous type C viruses isolated from the asian rodent Mus cervicolor: conservation of virogene sequences in related rodent species. J Virol. 1977 Mar;21(3):849-62. PubMed PMID: 66330; PubMed Central PMCID: PMC515622.
Phascolarctos cinereus	Koala	Xu W, Stadler CK, Gorman K, Jensen N, Kim D, Zheng H, Tang S, Switzer WM, Pye GW, Eiden MV. An exogenous retrovirus isolated from koalas with malignant neoplasias in a US zoo. Proc Natl Acad Sci U S A. 2013 Jul 9;110(28):11547-52. doi: 10.1073/pnas.1304704110. Epub 2013 Jun 24. PubMed PMID: 23798387; PubMed Central PMCID: PMC3710800.
		Denner J. Immunising with the transmembrane envelope proteins of different retroviruses including HIV-1: a comparative study. Hum Vaccin Immunother. 2013 Mar;9(3):462-70. Epub 2012 Dec 18. PubMed PMID: 23249763; PubMed Central PMCID: PMC3891701.
		Simmons GS, Young PR, Hanger JJ, Jones K, Clarke D, McKee JJ, Meers J. Prevalence of koala retrovirus in geographically diverse populations in Australia. Aust Vet J. 2012 Oct;90(10):404-9. doi: 10.1111/j.1751-0813.2012.00964.x. Epub 2012 Jul 24. PubMed PMID: 23004234.
		Ávila-Arcos MC, Ho SY, Ishida Y, Nikolaidis N, Tsangaras K, Hönig K, Medina R, Rasmussen M, Fordyce SL, Calvignac-Spencer S, Willerslev E, Gilbert MT, Helgen KM, Roca AL, Greenwood AD. One hundred twenty years of koala retrovirus evolution determined from museum skins. Mol Biol Evol. 2013 Feb;30(2):299-304. doi: 10.1093/molbev/mss223. Epub 2012 Sep 14. Erratum in: Mol Biol Evol. 2013 May;30(5):12…
		Cui J, Tachedjian G, Tachedjian M, Holmes EC, Zhang S, Wang LF. Identification of diverse groups of endogenous gammaretroviruses in mega- and microbats. J Gen Virol. 2012 Sep;93(Pt 9):2037-45. doi: 10.1099/vir.0.043760-0. Epub 2012 Jun 13. PubMed PMID: 22694899.
		Langhammer S, Fiebig U, Kurth R, Denner J. Increased neutralizing antibody response after simultaneous immunization with leucogen and the feline leukemia virus transmembrane protein. Intervirology. 2011 Feb;54(2):78-86. doi: 10.1159/000318892. Epub 2010 Sep 10. PubMed PMID: 20829603.
		Tarlinton R, Meers J, Young P. Biology and evolution of the endogenous koala retrovirus. Cell Mol Life Sci. 2008 Nov;65(21):3413-21. doi: 10.1007/s00018-008-8499-y. Review. PubMed PMID: 18818870.
		Tarlinton RE, Meers J, Young PR. Retroviral invasion of the koala genome. Nature. 2006 Jul 6;442(7098):79-81. PubMed PMID: 16823453.
		Fiebig U, Hartmann MG, Bannert N, Kurth R, Denner J. Transspecies transmission of the endogenous koala retrovirus. J Virol. 2006 Jun;80(11):5651-4. PubMed PMID: 16699047; PubMed Central PMCID: PMC1472152.
		Oliveira NM, Farrell KB, Eiden MV. In vitro characterization of a koala retrovirus. J Virol. 2006 Mar;80(6):3104-7. PubMed PMID: 16501122; PubMed Central PMCID: PMC1395464.
		Tarlinton R, Meers J, Hanger J, Young P. Real-time reverse transcriptase PCR for the endogenous koala retrovirus reveals an association between plasma viral load and neoplastic disease in koalas. J Gen Virol. 2005 Mar;86(Pt 3):783-7. PubMed PMID: 15722540.
		Hanger JJ, Bromham LD, McKee JJ, O'Brien TM, Robinson WF. The nucleotide sequence of koala (Phascolarctos cinereus) retrovirus: a novel type C endogenous virus related to Gibbon ape leukemia virus. J Virol. 2000 May;74(9):4264-72. PubMed PMID: 10756041; PubMed Central PMCID: PMC111943.
Microcebus murinus	Gray mouse lemur	Rahm N, Yap M, Snoeck J, Zoete V, Muñoz M, Radespiel U, Zimmermann E, Michielin O, Stoye JP, Ciuffi A, Telenti A. Unique spectrum of activity of prosimian TRIM5alpha against exogenous and endogenous retroviruses. J Virol. 2011 May;85(9):4173-83. doi: 10.1128/JVI.00075-11. Epub 2011 Feb 23. PubMed PMID: 21345948; PubMed Central PMCID: PMC3126249.
		Gifford RJ, Katzourakis A, Tristem M, Pybus OG, Winters M, Shafer RW. A transitional endogenous lentivirus from the genome of a basal primate and implications for lentivirus evolution. Proc Natl Acad Sci U S A. 2008 Dec 23;105(51):20362-7. doi: 10.1073/pnas.0807873105. Epub 2008 Dec 15. PubMed PMID: 19075221; PubMed Central PMCID: PMC2603253.
		Baillie GJ, van de Lagemaat LN, Baust C, Mager DL. Multiple groups of endogenous betaretroviruses in mice, rats, and other mammals. J Virol. 2004 Jun;78(11):5784-98. PubMed PMID: 15140976; PubMed Central PMCID: PMC415799.
Felis chaus	Jungle cat	Polani S, Roca AL, Rosensteel BB, Kolokotronis SO, Bar-Gal GK. Evolutionary dynamics of endogenous feline leukemia virus proliferation among species of the domestic cat lineage. Virology. 2010 Sep 30;405(2):397-407. doi: 10.1016/j.virol.2010.06.010. Epub 2010 Jul 7. PubMed PMID: 20615520.
Felis catus	Domestic cat	Ito J, Watanabe S, Hiratsuka T, Kuse K, Odahara Y, Ochi H, Kawamura M, Nishigaki K. Refrex-1, a soluble restriction factor against feline endogenous and exogenous retroviruses. J Virol. 2013 Nov;87(22):12029-40. doi: 10.1128/JVI.01267-13. Epub 2013 Aug 21. PubMed PMID: 23966402; PubMed Central PMCID: PMC3807920.
		Shimode S, Nakaoka R, Shogen H, Miyazawa T. Characterization of feline ASCT1 and ASCT2 as RD-114 virus receptor. J Gen Virol. 2013 Jul;94(Pt 7):1608-12. doi: 10.1099/vir.0.052928-0. Epub 2013 Apr 11. PubMed PMID: 23580426.
		Song N, Jo H, Choi M, Kim JH, Seo HG, Cha SY, Seo K, Park C. Identification and classification of feline endogenous retroviruses in the cat genome using degenerate PCR and in silico data analysis. J Gen Virol. 2013 Jul;94(Pt 7):1587-96. doi: 10.1099/vir.0.051862-0. Epub 2013 Mar 20. PubMed PMID: 23515024.
		Mendoza R, Miller AD, Overbaugh J. Disruption of thiamine uptake and growth of cells by feline leukemia virus subgroup A. J Virol. 2013 Mar;87(5):2412-9. doi: 10.1128/JVI.03203-12. Epub 2012 Dec 26. PubMed PMID: 23269813; PubMed Central PMCID: PMC3571393.
		Anai Y, Ochi H, Watanabe S, Nakagawa S, Kawamura M, Gojobori T, Nishigaki K. Infectious endogenous retroviruses in cats and emergence of recombinant viruses. J Virol. 2012 Aug;86(16):8634-44. doi: 10.1128/JVI.00280-12. Epub 2012 Jun 6. PubMed PMID: 22674983; PubMed Central PMCID: PMC3421742.
		Kozak CA. Naturally Occurring Polymorphisms of the Mouse Gammaretrovirus Receptors CAT-1 and XPR1 Alter Virus Tropism and Pathogenicity. Adv Virol. 2011;2011:975801. doi: 10.1155/2011/975801. Epub 2011 Oct 23. PubMed PMID: 22312361; PubMed Central PMCID: PMC3265322.
		Cornelis G, Heidmann O, Bernard-Stoecklin S, Reynaud K, Véron G, Mulot B, Dupressoir A, Heidmann T. Ancestral capture of syncytin-Car1, a fusogenic endogenous retroviral envelope gene involved in placentation and conserved in Carnivora. Proc Natl Acad Sci U S A. 2012 Feb 14;109(7):E432-41. doi: 10.1073/pnas.1115346109. Epub 2012 Jan 17. PubMed PMID: 22308384; PubMed Central PMCID: PMC3289388.
		Frecha C, Costa C, Nègre D, Amirache F, Trono D, Rio P, Bueren J, Cosset FL, Verhoeyen E. A novel lentiviral vector targets gene transfer into human hematopoietic stem cells in marrow from patients with bone marrow failure syndrome and in vivo in humanized mice. Blood. 2012 Feb 2;119(5):1139-50. doi: 10.1182/blood-2011-04-346619. Epub 2011 Nov 23. PubMed PMID: 22117040.
		Narushima R, Shimazaki T, Takahashi T. Development of a real-time reverse-transcription-PCR method for detection of RD114 virus in canine vaccines. Biologicals. 2011 Mar;39(2):89-93. doi: 10.1016/j.biologicals.2011.01.004. Epub 2011 Feb 22. PubMed PMID: 21345697.
		Narushima R, Horiuchi N, Usui T, Ogawa T, Takahashi T, Shimazaki T. Experimental infection of dogs with a feline endogenous retrovirus RD-114. Acta Vet Scand. 2011 Jan 27;53:3. doi: 10.1186/1751-0147-53-3. PubMed PMID: 21269522; PubMed Central PMCID: PMC3038973.
		Polani S, Roca AL, Rosensteel BB, Kolokotronis SO, Bar-Gal GK. Evolutionary dynamics of endogenous feline leukemia virus proliferation among species of the domestic cat lineage. Virology. 2010 Sep 30;405(2):397-407. doi: 10.1016/j.virol.2010.06.010. Epub 2010 Jul 7. PubMed PMID: 20615520.
		Willett BJ, McMonagle EL, Logan N, Schneider P, Hosie MJ. Enforced covalent trimerisation of soluble feline CD134 (OX40)-ligand generates a functional antagonist of feline immunodeficiency virus. Mol Immunol. 2009 Mar;46(6):1020-30. doi: 10.1016/j.molimm.2008.08.271. Epub 2009 Feb 1. PubMed PMID: 19181384; PubMed Central PMCID: PMC2676423.
		Yuhki N, Mullikin JC, Beck T, Stephens R, O'Brien SJ. Sequences, annotation and single nucleotide polymorphism of the major histocompatibility complex in the domestic cat. PLoS One. 2008 Jul 16;3(7):e2674. doi: 10.1371/journal.pone.0002674. PubMed PMID: 18629345; PubMed Central PMCID: PMC2453318.
		Tandon R, Cattori V, Willi B, Lutz H, Hofmann-Lehmann R. Quantification of endogenous and exogenous feline leukemia virus sequences by real-time PCR assays. Vet Immunol Immunopathol. 2008 May 15;123(1-2):129-33. doi: 10.1016/j.vetimm.2008.01.027. Epub 2008 Jan 19. Review. PubMed PMID: 18295344.
		Chang NT, Yang WK, Huang HC, Yeh KW, Wu CW. The transcriptional activity of HERV-I LTR is negatively regulated by its cis-elements and wild type p53 tumor suppressor protein. J Biomed Sci. 2007 Mar;14(2):211-22. Epub 2006 Dec 7. PubMed PMID: 17151828.
		Dahl A, Krämer F, Schnieder T. Detection of a gypsy-like sequence in the genome of the cat flea Ctenocephalides felis (Bouché 1835). Parasitol Res. 2007 Jan;100(2):311-6. Epub 2006 Aug 29. PubMed PMID: 16941190.
		Sandrin V, Cosset FL. Intracellular versus cell surface assembly of retroviral pseudotypes is determined by the cellular localization of the viral glycoprotein, its capacity to interact with Gag, and the expression of the Nef protein. J Biol Chem. 2006 Jan 6;281(1):528-42. Epub 2005 Sep 28. PubMed PMID: 16195228.
		Rasheed S, Mao Z, Chan JM, Chan LS. Is Melanoma a stem cell tumor? Identification of neurogenic proteins in trans-differentiated cells. J Transl Med. 2005 Mar 22;3(1):14. PubMed PMID: 15784142; PubMed Central PMCID: PMC1083422.
		Roca AL, Nash WG, Menninger JC, Murphy WJ, O'Brien SJ. Insertional polymorphisms of endogenous feline leukemia viruses. J Virol. 2005 Apr;79(7):3979-86. PubMed PMID: 15767400; PubMed Central PMCID: PMC1061563.
		Strang BL, Ikeda Y, Cosset FL, Collins MK, Takeuchi Y. Characterization of HIV-1 vectors with gammaretrovirus envelope glycoproteins produced from stable packaging cells. Gene Ther. 2004 Apr;11(7):591-8. PubMed PMID: 14724689.
		Hatada S, Grant DJ, Maeda N. An intronic endogenous retrovirus-like sequence attenuates human haptoglobin-related gene expression in an orientation-dependent manner. Gene. 2003 Nov 13;319:55-63. PubMed PMID: 14597171.
		Miyazawa T. Infections of feline leukemia virus and feline immunodeficiency virus. Front Biosci. 2002 Feb 1;7:d504-18. PubMed PMID: 11815291.
		Howard BD, Boenicke L, Schniewind B, Henne-Bruns D, Kalthoff H. Transduction of human pancreatic tumor cells with vesicular stomatitis virus G-pseudotyped retroviral vectors containing a herpes simplex virus thymidine kinase mutant gene enhances bystander effects and sensitivity to ganciclovir. Cancer Gene Ther. 2000 Jun;7(6):927-38. PubMed PMID: 10880025.
		Rasko JE, Battini JL, Kruglyak L, Cox DR, Miller AD. Precise gene localization by phenotypic assay of radiation hybrid cells. Proc Natl Acad Sci U S A. 2000 Jun 20;97(13):7388-92. PubMed PMID: 10852967; PubMed Central PMCID: PMC16555.
		Zhang JL, Sharma PL, Crumpacker CS. Enhancement of the basal-level activity of HIV-1 long terminal repeat by HIV-1 nucleocapsid protein. Virology. 2000 Mar 15;268(2):251-63. PubMed PMID: 10704334.
		van der Kuyl AC, Dekker JT, Goudsmit J. Discovery of a new endogenous type C retrovirus (FcEV) in cats: evidence for RD-114 being an FcEV(Gag-Pol)/baboon endogenous virus BaEV(Env) recombinant. J Virol. 1999 Oct;73(10):7994-8002. PubMed PMID: 10482547; PubMed Central PMCID: PMC112814.
		Bechtel MK, Hayes KA, Mathes LE, Pandey R, Stromberg PC, Roy-Burman P. Recombinant feline leukemia virus (FeLV) variants establish a limited infection with altered cell tropism in specific-pathogen-free cats in the absence of FeLV subgroup A helper virus. Vet Pathol. 1999 Mar;36(2):91-9. PubMed PMID: 10098636.
		Cosset FL, Takeuchi Y, Battini JL, Weiss RA, Collins MK. High-titer packaging cells producing recombinant retroviruses resistant to human serum. J Virol. 1995 Dec;69(12):7430-6. PubMed PMID: 7494248; PubMed Central PMCID: PMC189680.
		Egberink H, Horzinek MC. Animal immunodeficiency viruses. Vet Microbiol. 1992 Nov;33(1-4):311-31. Review. PubMed PMID: 1336243.
		Terry A, Fulton R, Stewart M, Onions DE, Neil JC. Pathogenesis of feline leukemia virus T17: contrasting fates of helper, v-myc, and v-tcr proviruses in secondary tumors. J Virol. 1992 Jun;66(6):3538-49. PubMed PMID: 1316466; PubMed Central PMCID: PMC241135.
		Faff O, Murray AB, Schmidt J, Leib-Mösch C, Erfle V, Hehlmann R. Retrovirus-like particles from the human T47D cell line are related to mouse mammary tumour virus and are of human endogenous origin. J Gen Virol. 1992 May;73 ( Pt 5):1087-97. PubMed PMID: 1375276.
		Feuchter AE, Mager DL. SV40 large T antigen trans-activates the long terminal repeats of a large family of human endogenous retrovirus-like sequences. Virology. 1992 Mar;187(1):242-50. PubMed PMID: 1310558.
		La Mantia G, Maglione D, Pengue G, Di Cristofano A, Simeone A, Lanfrancone L, Lania L. Identification and characterization of novel human endogenous retroviral sequences prefentially expressed in undifferentiated embryonal carcinoma cells. Nucleic Acids Res. 1991 Apr 11;19(7):1513-20. PubMed PMID: 2027759; PubMed Central PMCID: PMC333909.
		Helmberg A, Fässler R, Geley S, Jöhrer K, Kroemer G, Böck G, Kofler R. Glucocorticoid-regulated gene expression in the immune system. Analysis of glucocorticoid-regulated transcripts from the mouse macrophage-like cell line P388D1. J Immunol. 1990 Dec 15;145(12):4332-7. PubMed PMID: 2258621.
		Cheney CM, Rojko JL, Kociba GJ, Wellman ML, Di Bartola SP, Rezanka LJ, Forman L, Mathes LE. A feline large granular lymphoma and its derived cell line. In Vitro Cell Dev Biol. 1990 May;26(5):455-63. PubMed PMID: 2161827.
		Sommerfelt MA, Weiss RA. Receptor interference groups of 20 retroviruses plating on human cells. Virology. 1990 May;176(1):58-69. PubMed PMID: 1691887.
		Prösch S. Characterization of RD114-related endogenous cat retroviral elements ECE2. Arch Exp Veterinarmed. 1990;44(6):935-9. PubMed PMID: 2102652.
		Spodick DA, Ghosh AK, Parimoo S, Roy-Burman P. The long terminal repeat of feline endogenous RD-114 retroviral DNAs: analysis of transcription regulatory activity and nucleotide sequence. Virus Res. 1988 Feb;9(2-3):263-83. PubMed PMID: 2833049.
		Begemann M, Hsiao WL, Weinstein IB. Differences between normal and transformed murine fibroblasts in the expression of various promoter/enhancer-chloramphenicol acetyltransferase constructs. Mol Carcinog. 1988;1(3):196-201. PubMed PMID: 2855022.
		Harada F, Tsukada N, Kato N. Isolation of three kinds of human endogenous retrovirus-like sequences using tRNA(Pro) as a probe. Nucleic Acids Res. 1987 Nov 25;15(22):9153-62. PubMed PMID: 2825129; PubMed Central PMCID: PMC306459.
		Horowitz JM, Holland GD, King SR, Risser R. Germ line integration of a murine leukemia provirus into a retroviruslike sequence. J Virol. 1987 Mar;61(3):701-7. PubMed PMID: 3027396; PubMed Central PMCID: PMC254009.
		Arrigo S, Yun M, Beemon K. cis-acting regulatory elements within gag genes of avian retroviruses. Mol Cell Biol. 1987 Jan;7(1):388-97. PubMed PMID: 3031470; PubMed Central PMCID: PMC365080.
		Feenstra A, Fewell J, Lueders K, Kuff E. In vitro methylation inhibits the promotor activity of a cloned intracisternal A-particle LTR. Nucleic Acids Res. 1986 May 27;14(10):4343-52. PubMed PMID: 2423967; PubMed Central PMCID: PMC339865.
		Lewis MG, Kociba GJ, Rojko JL, Stiff MI, Haberman AB, Velicer LF, Olsen RG. Retroviral-associated eosinophilic leukemia in the cat. Am J Vet Res. 1985 May;46(5):1066-70. PubMed PMID: 2988377.
		Drescher B, Möhring R, Winkler J, Nyakatura G, Rosenthal S. Partial sequence homology between retroviruses of various species in the C-terminal part of the env gene. Folia Biol (Praha). 1985;31(2):93-106. PubMed PMID: 2991031.
		Reeves RH, O'Brien SJ. Molecular genetic characterization of the RD-114 gene family of endogenous feline retroviral sequences. J Virol. 1984 Oct;52(1):164-71. PubMed PMID: 6090693; PubMed Central PMCID: PMC254502.
		Spodick DA, Soe LH, Roy-Burman P. Genetic analysis of the feline RD-114 retrovirus-related endogenous elements. Virus Res. 1984 Oct;1(7):543-55. PubMed PMID: 6085439.
		Rasheed S. Characterization of a differentiated cat melanoma cell line. Cancer Res. 1983 Jul;43(7):3379-84. PubMed PMID: 6850643.
		Stiff MI, Olsen RG. Effects of retrovirus protein on the feline one-way mixed leukocyte reaction. J Gen Virol. 1983 Apr;64 (Pt 4):957-9. PubMed PMID: 6300313.
		Busch MP, Devi BG, Soe LH, Perbal B, Baluda MA, Roy-Burman P. Characterization of the expression of cellular retrovirus genes and oncogenes in feline cells. Hematol Oncol. 1983 Jan-Mar;1(1):61-75. PubMed PMID: 6329934.
		Rasheed S. Role of endogenous cat retrovirus in cell differentiation. Proc Natl Acad Sci U S A. 1982 Dec;79(23):7371-5. PubMed PMID: 6961415; PubMed Central PMCID: PMC347341.
		Lovinger GG, Mark G, Todaro GJ, Schochetman G. 5'-terminal nucleotide noncoding sequences of retroviruses: relatedness of two old world primate type C viruses and avian spleen necrosis virus. J Virol. 1981 Jul;39(1):238-45. PubMed PMID: 6268813; PubMed Central PMCID: PMC171282.
		Todaro GJ, Sherr CJ, Sen A, King N, Daniel MD, Fleckenstein B. Endogenous New World primate type C viruses isolated from owl monkey (Aotus trivirgatus) kidney cell line. Proc Natl Acad Sci U S A. 1978 Feb;75(2):1004-8. PubMed PMID: 76312; PubMed Central PMCID: PMC411388.
Canis lupus familiaris	Dog	Narushima R, Ogawa T, Shimazaki T. Endogenous feline retrovirus RD-114 does not elicit neutralizing antibodies in dogs. Acta Virol. 2012;56(4):343-4. PubMed PMID: 23237091.
		Tarlinton RE, Barfoot HK, Allen CE, Brown K, Gifford RJ, Emes RD. Characterisation of a group of endogenous gammaretroviruses in the canine genome. Vet J. 2013 Apr;196(1):28-33. doi: 10.1016/j.tvjl.2012.08.011. Epub 2012 Sep 27. PubMed PMID: 23021955.
		Cornelis G, Heidmann O, Bernard-Stoecklin S, Reynaud K, Véron G, Mulot B, Dupressoir A, Heidmann T. Ancestral capture of syncytin-Car1, a fusogenic endogenous retroviral envelope gene involved in placentation and conserved in Carnivora. Proc Natl Acad Sci U S A. 2012 Feb 14;109(7):E432-41. doi: 10.1073/pnas.1115346109. Epub 2012 Jan 17. PubMed PMID: 22308384; PubMed Central PMCID: PMC3289388.
		Jo H, Choi H, Choi MK, Song N, Kim JH, Oh JW, Seo K, Seo HG, Chun T, Kim TH, Park C. Identification and classification of endogenous retroviruses in the canine genome using degenerative PCR and in-silico data analysis. Virology. 2012 Jan 20;422(2):195-204. doi: 10.1016/j.virol.2011.10.010. Epub 2011 Nov 14. PubMed PMID: 22088214.
		Barrio ÁM, Ekerljung M, Jern P, Benachenhou F, Sperber GO, Bongcam-Rudloff E, Blomberg J, Andersson G. The first sequenced carnivore genome shows complex host-endogenous retrovirus relationships. PLoS One. 2011 May 12;6(5):e19832. doi: 10.1371/journal.pone.0019832. PubMed PMID: 21589882; PubMed Central PMCID: PMC3093408.
		Narushima R, Shimazaki T, Takahashi T. Development of a real-time reverse-transcription-PCR method for detection of RD114 virus in canine vaccines. Biologicals. 2011 Mar;39(2):89-93. doi: 10.1016/j.biologicals.2011.01.004. Epub 2011 Feb 22. PubMed PMID: 21345697.
		Narushima R, Horiuchi N, Usui T, Ogawa T, Takahashi T, Shimazaki T. Experimental infection of dogs with a feline endogenous retrovirus RD-114. Acta Vet Scand. 2011 Jan 27;53:3. doi: 10.1186/1751-0147-53-3. PubMed PMID: 21269522; PubMed Central PMCID: PMC3038973.
		Ye Z, Xing XW, Tong QJ, Rong PF, Wang W. [Potential risk of porcine endogenous retrovirus cross-species transmission in neonatal pig islets under xenotransplanted condition]. Zhong Nan Da Xue Xue Bao Yi Xue Ban. 2007 Oct;32(5):747-52. Chinese. PubMed PMID: 18007064.
		Ma J, Waxman DJ. Collaboration between hepatic and intratumoral prodrug activation in a P450 prodrug-activation gene therapy model for cancer treatment. Mol Cancer Ther. 2007 Nov;6(11):2879-90. Epub 2007 Nov 7. PubMed PMID: 17989319; PubMed Central PMCID: PMC2613795.
		Ota T, Taketani S, Iwai S, Miyagawa S, Furuta M, Hara M, Uchimura E, Okita Y, Sawa Y. Novel method of decellularization of porcine valves using polyethylene glycol and gamma irradiation. Ann Thorac Surg. 2007 Apr;83(4):1501-7. PubMed PMID: 17383366.
		Gu CH, Liu WY, Yi DH, Wang YY, Zhang JB, Wei XY, Ouyang H, Liu XG, Tan HM. [Effects of modified acellularization process on porcine endogenous retroviruses in porcine aorta valves]. Zhonghua Yi Xue Za Zhi. 2005 Jul 13;85(26):1827-30. Chinese. PubMed PMID: 16253188.
		Goerner M, Horn PA, Peterson L, Kurre P, Storb R, Rasko JE, Kiem HP. Sustained multilineage gene persistence and expression in dogs transplanted with CD34(+) marrow cells transduced by RD114-pseudotype oncoretrovirus vectors. Blood. 2001 Oct 1;98(7):2065-70. PubMed PMID: 11567991.
		Takeuchi Y, Patience C, Magre S, Weiss RA, Banerjee PT, Le Tissier P, Stoye JP. Host range and interference studies of three classes of pig endogenous retrovirus. J Virol. 1998 Dec;72(12):9986-91. PubMed PMID: 9811736; PubMed Central PMCID: PMC110514.
		Takeuchi Y, Cosset FL, Lachmann PJ, Okada H, Weiss RA, Collins MK. Type C retrovirus inactivation by human complement is determined by both the viral genome and the producer cell. J Virol. 1994 Dec;68(12):8001-7. PubMed PMID: 7966590; PubMed Central PMCID: PMC237263.
		Larsson E, Nilsson BO, Sundström P, Widéhn S. Morphological and microbiological signs of endogenous C-virus in human oocytes. Int J Cancer. 1981 Nov 15;28(5):551-7. PubMed PMID: 6171530.
		Ahmed M, Yeh J, Stephens R, Holden HE, Schlom J, Drohan W, Howard DK. Characterization of a retrovirus isolated from normal mink cells co-cultivated with a dog mammary tumour. J Gen Virol. 1979 Jan;42(1):179-84. PubMed PMID: 83351.
Felis silvestris	Wildcat	Polani S, Roca AL, Rosensteel BB, Kolokotronis SO, Bar-Gal GK. Evolutionary dynamics of endogenous feline leukemia virus proliferation among species of the domestic cat lineage. Virology. 2010 Sep 30;405(2):397-407. doi: 10.1016/j.virol.2010.06.010. Epub 2010 Jul 7. PubMed PMID: 20615520.
		Tandon R, Cattori V, Willi B, Lutz H, Hofmann-Lehmann R. Quantification of endogenous and exogenous feline leukemia virus sequences by real-time PCR assays. Vet Immunol Immunopathol. 2008 May 15;123(1-2):129-33. doi: 10.1016/j.vetimm.2008.01.027. Epub 2008 Jan 19. Review. PubMed PMID: 18295344.
Cavia porcellus	Guinea pig	Cianciolo GJ, Pizzo SV. Anti-inflammatory and vasoprotective activity of aretroviral-derived peptide, homologous to human endogenous retroviruses:endothelial cell effects. PLoS One. 2012;7(12):e52693. doi:10.1371/journal.pone.0052693. Epub 2012 Dec 20. PubMed PMID: 23285152; PubMedCentral PMCID: PMC3527569.
		Vernochet C, Heidmann O, Dupressoir A, Cornelis G, Dessen P, Catzeflis F,Heidmann T. A syncytin-like endogenous retrovirus envelope gene of the guinea pigspecifically expressed in the placenta junctional zone and conserved inCaviomorpha. Placenta. 2011 Nov;32(11):885-92. doi:10.1016/j.placenta.2011.08.006. Epub 2011 Sep 3. PubMed PMID: 21893339.
		Argaw T, Colon-Moran W, Wilson CA. Limited infection without evidence ofreplication by porcine endogenous retrovirus in guinea pigs. J Gen Virol. 2004Jan;85(Pt 1):15-9. PubMed PMID: 14718614.
		Argaw T, Ritzhaupt A, Wilson CA. Development of a real time quantitative PCRassay for detection of porcine endogenous retrovirus. J Virol Methods. 2002Oct;106(1):97-106. Erratum in: J Virol Methods. 2003 Aug;111(2):165. PubMed PMID:12367734.
		Lerner-Tung MB, Doong SL, Cheng YC, Hsiung GD. Characterization of conditions for the activation of endogenous guinea pig retrovirus in cultured cells by5-bromo-2'-deoxyuridine. Virus Genes. 1995 Feb;9(3):201-9. PubMed PMID: 7597799.
		Lerner-Tung MB, Crouch JY, Hsiung GD. Demonstration of cytomegalovirus andretrovirus pseudotypes in cultured guinea pig cells. Virology. 1991Feb;180(2):826-30. PubMed PMID: 1703374.
		Sarma PS, Rowe WP. Mouse immunoglobulin antibodies require complement forneutralization of mouse retroviruses. J Virol. 1983 Mar;45(3):956-60. PubMedPMID: 6300466; PubMed Central PMCID: PMC256501.
		Dahlberg JE, Tronick SR, Aaronson SA. Immunological relationships of anendogenous guinea pig retrovirus with prototype mammalian type B and type Dretroviruses. J Virol. 1980 Jan;33(1):522-30. PubMed PMID: 6154150; PubMedCentral PMCID: PMC288566.
		Davis AR, Nayak DP, Lofgren J. Induction of endogenous guinea pig retrovirusby 5-bromodeoxyuridine: amplification of virus-specific RNA. J Virol. 1978Jun;26(3):603-14. PubMed PMID: 566798; PubMed Central PMCID: PMC525886.
		Davis AR, Nayak DP. Expression of endogenous retroviral genes in leukemicguinea pig cells. J Virol. 1977 Aug;23(2):263-71. PubMed PMID: 69723; PubMedCentral PMCID: PMC515828.
Sus scrofa	Pig	Scobie L, Padler-Karavani V, Le Bas-Bernardet S, Crossan C, Blaha J, Matouskova M, Hector RD, Cozzi E, Vanhove B, Charreau B, Blancho G, Bourdais L, Tallacchini M, Ribes JM, Yu H, Chen X, Kracikova J, Broz L, Hejnar J, Vesely P, Takeuchi Y, Varki A, Soulillou JP. Long-term IgG response to porcine Neu5Gc antigens without transmission of PERV in burn patients treated with porcine skin xenografts. J…
		Lin X, Qi L, Li Z, Chi H, Lin W, Wang Y, Jiang Z, Pan M, Gao Y. Susceptibility of human liver cells to porcine endogenous retrovirus. Exp Clin Transplant. 2013 Dec;11(6):541-5. doi: 10.6002/ect.2012.0213. Epub 2013 Jul 31. PubMed PMID: 23901808.
		Prabha SM, Verghese S. Transmission of zoonoses in xenotransplantation: porcine endogenous retroviruses from an immunological and molecular point of view. Indian J Med Sci. 2012 Sep-Oct;66(9-10):199-206. doi: 10.4103/0019-5359.115210. PubMed PMID: 23897566.
		Jung YD, Lee JR, Kim YJ, Ha HS, Oh KB, Im GS, Choi BH, Kim HS. Promoter activity analysis and methylation characterization of LTR elements of PERVs in NIH miniature pig. Genes Genet Syst. 2013;88(2):135-42. PubMed PMID: 23832305.
		Mazurek U, Kimsa MC, Strzalka-Mrozik B, Kimsa MW, Adamska J, Lipinski D, Zeyland J, Szalata M, Slomski R, Jura J, Smorag Z, Nowak R, Gola J. Quantitative analysis of porcine endogenous retroviruses in different organs of transgenic pigs generated for xenotransplantation. Curr Microbiol. 2013 Oct;67(4):505-14. doi: 10.1007/s00284-013-0397-3. Epub 2013 Jun 2. PubMed PMID: 23728786.
		Semaan M, Rotem A, Barkai U, Bornstein S, Denner J. Screening pigs for xenotransplantation: prevalence and expression of porcine endogenous retroviruses in Göttingen minipigs. Xenotransplantation. 2013 May-Jun;20(3):148-56. doi: 10.1111/xen.12032. Epub 2013 Apr 2. PubMed PMID: 23551867.
		Li ZG, Liu GB, Pan MX, Wu QS, Ge M, Du J, Wang Y, Gao Y. Knockdown of porcine endogenous retroviruses by RNA interference in Chinese experimental miniature pig fibroblasts. Transplant Proc. 2013 Mar;45(2):748-55. doi: 10.1016/j.transproceed.2012.03.068. PubMed PMID: 23498816.
		Jung YD, Ha HS, Park SJ, Oh KB, Im GS, Kim TH, Seong HH, Kim HS. Identification and promoter analysis of PERV LTR subtypes in NIH-miniature pig. Mol Cells. 2013 Feb;35(2):99-105. doi: 10.1007/s10059-013-2289-6. Epub 2013 Feb 21. PubMed PMID: 23456331; PubMed Central PMCID: PMC3887905.
		Schneider MK, Seebach JD. Xenotransplantation literature update, November-December 2012. Xenotransplantation. 2013 Jan-Feb;20(1):36-8. doi: 10.1111/xen.12016. Review. PubMed PMID: 23384143.
		Wolf G, Nielsen AL, Mikkelsen JG, Pedersen FS. Epigenetic marking and repression of porcine endogenous retroviruses. J Gen Virol. 2013 May;94(Pt 5):960-70. doi: 10.1099/vir.0.049288-0. Epub 2013 Jan 16. PubMed PMID: 23324470.
		Cianciolo GJ, Pizzo SV. Anti-inflammatory and vasoprotective activity of a retroviral-derived peptide, homologous to human endogenous retroviruses: endothelial cell effects. PLoS One. 2012;7(12):e52693. doi: 10.1371/journal.pone.0052693. Epub 2012 Dec 20. PubMed PMID: 23285152; PubMed Central PMCID: PMC3527569.
		Denner J, Mihica D, Kaulitz D, Schmidt CM. Increased titers of neutralizing antibodies after immunization with both envelope proteins of the porcine endogenous retroviruses (PERVs). Virol J. 2012 Nov 5;9:260. doi: 10.1186/1743-422X-9-260. PubMed PMID: 23126255; PubMed Central PMCID: PMC3554530.
		Park KM, Park SM, Yang SR, Hong SH, Woo HM. Preparation of immunogen-reduced and biocompatible extracellular matrices from porcine liver. J Biosci Bioeng. 2013 Feb;115(2):207-15. doi: 10.1016/j.jbiosc.2012.08.023. Epub 2012 Oct 12. PubMed PMID: 23068617.
		Kaulitz D, Mihica D, Adlhoch C, Semaan M, Denner J. Improved pig donor screening including newly identified variants of porcine endogenous retrovirus-C (PERV-C). Arch Virol. 2013 Feb;158(2):341-8. doi: 10.1007/s00705-012-1490-9. Epub 2012 Oct 4. PubMed PMID: 23053520.
		Jung WY, Yu SL, Seo DW, Jung KC, Cho IC, Lim HT, Jin DI, Lee JH. Characterization of insertional variation of porcine endogenous retroviruses in six different pig breeds. Asian-Australas J Anim Sci. 2012 Oct;25(10):1357-63. doi: 10.5713/ajas.2012.12131. PubMed PMID: 25049490; PubMed Central PMCID: PMC4093020.
		Masembe C, Michuki G, Onyango M, Rumberia C, Norling M, Bishop RP, Djikeng A, Kemp SJ, Orth A, Skilton RA, Ståhl K, Fischer A. Viral metagenomics demonstrates that domestic pigs are a potential reservoir for Ndumu virus. Virol J. 2012 Sep 24;9:218. doi: 10.1186/1743-422X-9-218. PubMed PMID: 23006778; PubMed Central PMCID: PMC3512490.
		Bittmann I, Mihica D, Plesker R, Denner J. Expression of porcine endogenous retroviruses (PERV) in different organs of a pig. Virology. 2012 Nov 25;433(2):329-36. doi: 10.1016/j.virol.2012.08.030. Epub 2012 Sep 11. PubMed PMID: 22975674.
		Cheng D, Li Z, Liu Y, Gao Y, Wang H. Kinetic analysis of porcine fibroblast reprogramming toward pluripotency by defined factors. Cell Reprogram. 2012 Aug;14(4):312-23. doi: 10.1089/cell.2012.0025. Epub 2012 Jul 9. PubMed PMID: 22775330.
		Han B, Shi XL, Zhang Y, Chu XH, Gu JY, Xiao JQ, Ren HZ, Tan JJ, Gu ZZ, Ding YT. Microbiological safety of a novel bio-artificial liver support system based on porcine hepatocytes: a experimental study. Eur J Med Res. 2012 May 25;17:13. doi: 10.1186/2047-783X-17-13. PubMed PMID: 22632261; PubMed Central PMCID: PMC3419623.
		Mattiuzzo G, Takeuchi Y, Scobie L. Potential zoonotic infection of porcine endogenous retrovirus in xenotransplantation. Methods Mol Biol. 2012;885:263-79. doi: 10.1007/978-1-61779-845-0_17. PubMed PMID: 22566002.
		Denner J, Tönjes RR. Infection barriers to successful xenotransplantation focusing on porcine endogenous retroviruses. Clin Microbiol Rev. 2012 Apr;25(2):318-43. doi: 10.1128/​CMR.05011-11. Review. PubMed PMID: 22491774; PubMed Central PMCID: PMC3346299.
		Shi XL, Han B, Zhang Y, Gu JY, Chu XH, Xiao JQ, Tan JJ, Ding YT. [New evidence of porcine endogenous retrovirus transmission with new bio-artificial liver system: a experimental study]. Zhonghua Gan Zang Bing Za Zhi. 2012 Jan;20(1):45-9. doi: 10.3760/cma.j.issn.1007-3418.2012.01.013. Chinese. PubMed PMID: 22464706.
		Quereda JJ, Herrero-Medrano JM, Abellaneda JM, García-Nicolás O, Martínez-Alarcón L, Pallarés FJ, Ramírez P, Muñoz A, Ramis G. Porcine endogenous retrovirus copy number in different pig breeds is not related to genetic diversity. Zoonoses Public Health. 2012 Sep;59(6):401-7. doi: 10.1111/j.1863-2378.2012.01467.x. Epub 2012 Feb 21. PubMed PMID: 22348392.
		Thomson AJ, Pierart H, Meek S, Bogerman A, Sutherland L, Murray H, Mountjoy E, Downing A, Talbot R, Sartori C, Whitelaw CB, Freeman TC, Archibald AL, Burdon T. Reprogramming pig fetal fibroblasts reveals a functional LIF signaling pathway. Cell Reprogram. 2012 Apr;14(2):112-22. doi: 10.1089/cell.2011.0078. Epub 2012 Feb 17. PubMed PMID: 22339199.
		Miyagawa S, Ueno T, Nagashima H, Takama Y, Fukuzawa M. Carbohydrate antigens. Curr Opin Organ Transplant. 2012 Apr;17(2):174-9. doi: 10.1097/MOT.0b013e3283508189. Review. PubMed PMID: 22262104.
		Wang W, Mo Z, Ye B, Hu P, Liu S, Yi S. A clinical trial of xenotransplantation of neonatal pig islets for diabetic patients. Zhong Nan Da Xue Xue Bao Yi Xue Ban. 2011 Dec;36(12):1134-40. doi: 10.3969/j.issn.1672-7347.2011.12.002. PubMed PMID: 22246351.
		Meng XJ. Emerging and Re-emerging Swine Viruses. Transbound Emerg Dis. 2012 Jan 9. doi: 10.1111/j.1865-1682.2011.01291.x. [Epub ahead of print] PubMed PMID: 22225855.
		Fang X, Mou Y, Huang Z, Li Y, Han L, Zhang Y, Feng Y, Chen Y, Jiang X, Zhao W, Sun X, Xiong Z, Yang L, Liu H, Fan D, Mao L, Ren L, Liu C, Wang J, Li K, Wang G, Yang S, Lai L, Zhang G, Li Y, Wang J, Bolund L, Yang H, Wang J, Feng S, Li S, Du Y. The sequence and analysis of a Chinese pig genome. Gigascience. 2012 Nov 15;1(1):16. doi: 10.1186/2047-217X-1-16. PubMed PMID: 23587058; PubMed Central PMC…
		Elleder D, Kim O, Padhi A, Bankert JG, Simeonov I, Schuster SC, Wittekindt NE, Motameny S, Poss M. Polymorphic integrations of an endogenous gammaretrovirus in the mule deer genome. J Virol. 2012 Mar;86(5):2787-96. doi: 10.1128/JVI.06859-11. Epub 2011 Dec 21. PubMed PMID: 22190723; PubMed Central PMCID: PMC3302240.
		Lee D, Lee J, Yoon JK, Kim NY, Kim GW, Park C, Oh YK, Kim YB. Rapid determination of perv copy number from porcine genomic DNA by real-time polymerase chain reaction. Anim Biotechnol. 2011 Oct;22(4):175-80. doi: 10.1080/10495398.2011.595294. PubMed PMID: 22132811.
		Le Bas-Bernardet S, Tillou X, Poirier N, Dilek N, Chatelais M, Devallière J, Charreau B, Minault D, Hervouet J, Renaudin K, Crossan C, Scobie L, Cowan PJ, d'Apice AJ, Galli C, Cozzi E, Soulillou JP, Vanhove B, Blancho G. Xenotransplantation of galactosyl-transferase knockout, CD55, CD59, CD39, and fucosyl-transferase transgenic pig kidneys into baboons. Transplant Proc. 2011 Nov;43(9):3426-30. do…
		Bikhchandani J, Metcalfe M, Illouz S, Puls F, Dennison A. Extracorporeal liver perfusion system for artificial liver support across a membrane. J Surg Res. 2011 Nov;171(1):e139-47. doi: 10.1016/j.jss.2011.07.014. Epub 2011 Aug 9. PubMed PMID: 21920550.
		Yu SL, Jung WY, Jung KC, Cho IC, Lim HT, Jin DI, Lee JH. Characterization of porcine endogenous retrovirus clones from the NIH miniature pig BAC library. J Biomed Biotechnol. 2012;2012:482568. doi: 10.1155/2012/482568. Epub 2011 Sep 7. PubMed PMID: 21912484; PubMed Central PMCID: PMC3168785.
		Liu G, Li Z, Pan M, Ge M, Wang Y, Gao Y. Genetic prevalence of porcine endogenous retrovirus in chinese experimental miniature pigs. Transplant Proc. 2011 Sep;43(7):2762-9. doi: 10.1016/j.transproceed.2011.06.061. PubMed PMID: 21911159.
		Vernochet C, Heidmann O, Dupressoir A, Cornelis G, Dessen P, Catzeflis F, Heidmann T. A syncytin-like endogenous retrovirus envelope gene of the guinea pig specifically expressed in the placenta junctional zone and conserved in Caviomorpha. Placenta. 2011 Nov;32(11):885-92. doi: 10.1016/j.placenta.2011.08.006. Epub 2011 Sep 3. PubMed PMID: 21893339.
		Han B, Shi XL, Xiao JQ, Zhang Y, Chu XH, Gu JY, Tan JJ, Gu ZZ, Ding YT. Influence of chitosan nanofiber scaffold on porcine endogenous retroviral expression and infectivity in pig hepatocytes. World J Gastroenterol. 2011 Jun 14;17(22):2774-80. doi: 10.3748/wjg.v17.i22.2774. PubMed PMID: 21734784; PubMed Central PMCID: PMC3122264.
		Denner J. Infectious risk in xenotransplantation--what post-transplant screening for the human recipient? Xenotransplantation. 2011 May-Jun;18(3):151-7. doi: 10.1111/j.1399-3089.2011.00636.x. Review. PubMed PMID: 21696444.
		Nascimento FF, Gongora J, Charleston M, Tristem M, Lowden S, Moran C. Evolution of endogenous retroviruses in the Suidae: evidence for different viral subpopulations in African and Eurasian host species. BMC Evol Biol. 2011 May 24;11:139. doi: 10.1186/1471-2148-11-139. PubMed PMID: 21609472; PubMed Central PMCID: PMC3128044.
		Wynyard S, Garkavenko O, Elliot R. Multiplex high resolution melting assay for estimation of Porcine Endogenous Retrovirus (PERV) relative gene dosage in pigs and detection of PERV infection in xenograft recipients. J Virol Methods. 2011 Jul;175(1):95-100. doi: 10.1016/j.jviromet.2011.04.026. Epub 2011 Apr 28. PubMed PMID: 21545811.
		Kaulitz D, Mihica D, Dorna J, Costa MR, Petersen B, Niemann H, Tönjes RR, Denner J. Development of sensitive methods for detection of porcine endogenous retrovirus-C (PERV-C) in the genome of pigs. J Virol Methods. 2011 Jul;175(1):60-5. doi: 10.1016/j.jviromet.2011.04.017. Epub 2011 Apr 29. PubMed PMID: 21539860.
		Bae EH, Jung YT. Evaluation of the potential risk of porcine endogenous retrovirus (PERV) infection in nude mice. J Microbiol Biotechnol. 2011 Apr;21(4):387-90. PubMed PMID: 21532322.
		Lee J, Choi JY, Lee HJ, Kim KC, Choi BS, Oh YK, Kim YB. Repression of porcine endogenous retrovirus infection by human APOBEC3 proteins. Biochem Biophys Res Commun. 2011 Apr 1;407(1):266-70. doi: 10.1016/j.bbrc.2011.03.023. Epub 2011 Mar 23. PubMed PMID: 21396348.
		Pal N, Baker R, Schalk S, Scobie L, Tucker AW, Opriessnig T. Detection of porcine endogenous retrovirus (PERV) viremia in diseased versus healthy US pigs by qualitative and quantitative real-time RT-PCR. Transbound Emerg Dis. 2011 Aug;58(4):344-51. doi: 10.1111/j.1865-1682.2011.01210.x. Epub 2011 Mar 13. PubMed PMID: 21396084.
		Mueller NJ, Takeuchi Y, Mattiuzzo G, Scobie L. Microbial safety in xenotransplantation. Curr Opin Organ Transplant. 2011 Apr;16(2):201-6. doi: 10.1097/MOT.0b013e32834486f6. Review. PubMed PMID: 21358331.
		Dörrschuck E, Fischer N, Bravo IG, Hanschmann KM, Kuiper H, Spötter A, Möller R, Cichutek K, Münk C, Tönjes RR. Restriction of porcine endogenous retrovirus by porcine APOBEC3 cytidine deaminases. J Virol. 2011 Apr;85(8):3842-57. doi: 10.1128/JVI.01880-10. Epub 2011 Feb 9. PubMed PMID: 21307203; PubMed Central PMCID: PMC3126140.
		Yang Q, Liu F, Pan XP, Lv G, Zhang A, Yu CB, Li L. Fluidized-bed bioartificial liver assist devices (BLADs) based on microencapsulated primary porcine hepatocytes have risk of porcine endogenous retroviruses transmission. Hepatol Int. 2010 Aug 15;4(4):757-61. doi: 10.1007/s12072-010-9210-6. PubMed PMID: 21286347; PubMed Central PMCID: PMC2994615.
		do Nascimento FF, Gongora J, Tristem M, Lowden S, Moran C. Distinctive differences in long terminal repeat sequences between γ1 endogenous retroviruses of African and Eurasian suid species. Infect Genet Evol. 2011 Apr;11(3):686-93. doi: 10.1016/j.meegid.2011.01.010. Epub 2011 Jan 21. PubMed PMID: 21256982.
		Kaulitz D, Mihica D, Plesker R, Geissler A, Tönjes RR, Denner J. Absence of infection in pigs inoculated with high-titre recombinant PERV-A/C. Arch Virol. 2011 Apr;156(4):707-10. doi: 10.1007/s00705-010-0896-5. Epub 2011 Jan 1. PubMed PMID: 21197554.
		Mattiuzzo G, Takeuchi Y. Suboptimal porcine endogenous retrovirus infection in non-human primate cells: implication for preclinical xenotransplantation. PLoS One. 2010 Oct 6;5(10):e13203. doi: 10.1371/journal.pone.0013203. PubMed PMID: 20949092; PubMed Central PMCID: PMC2950858.
		Matsumoto S. Islet cell transplantation for Type 1 diabetes. J Diabetes. 2010 Mar;2(1):16-22. doi: 10.1111/j.1753-0407.2009.00048.x. Epub 2009 Aug 17. PubMed PMID: 20923470.
		Zhang P, Yu P, Wang W, Zhang L, Li SF, Bu H. Molecular characterization of long terminal repeat of porcine endogenous retroviruses in Chinese pigs. Acta Virol. 2010;54(3):165-72. PubMed PMID: 20822308.
		Park SJ, Huh JW, Kim DS, Ha HS, Jung YD, Ahn K, Oh KB, Park EW, Chang KT, Kim HS. Analysis of the molecular and regulatory properties of active porcine endogenous retrovirus gamma-1 long terminal repeats in kidney tissues of the NIH-Miniature pig. Mol Cells. 2010 Oct;30(4):319-25. doi: 10.1007/s10059-010-0121-0. Epub 2010 Aug 27. PubMed PMID: 20811814.
		Moon HJ, Park SJ, Kim HK, Ann SK, Rho S, Keum HO, Park BK. Simultaneous detection and subtyping of porcine endogenous retroviruses proviral DNA using the dual priming oligonucleotide system. J Vet Sci. 2010 Sep;11(3):269-71. PubMed PMID: 20706036; PubMed Central PMCID: PMC2924490.
		Karlas A, Irgang M, Votteler J, Specke V, Ozel M, Kurth R, Denner J. Characterisation of a human cell-adapted porcine endogenous retrovirus PERV-A/C. Ann Transplant. 2010 Apr-Jun;15(2):45-54. PubMed PMID: 20657519.
		Ma Y, Yang Y, Lv M, Yan Q, Zheng L, Ding F, Wu J, Tian K, Zhang J. Real-time quantitative polymerase chain reaction with SYBR green i detection for estimating copy numbers of porcine endogenous retrovirus from Chinese miniature pigs. Transplant Proc. 2010 Jun;42(5):1949-52. doi: 10.1016/j.transproceed.2010.01.054. PubMed PMID: 20620553.
		Victoria JG, Wang C, Jones MS, Jaing C, McLoughlin K, Gardner S, Delwart EL. Viral nucleic acids in live-attenuated vaccines: detection of minority variants and an adventitious virus. J Virol. 2010 Jun;84(12):6033-40. doi: 10.1128/JVI.02690-09. Epub 2010 Apr 7. PubMed PMID: 20375174; PubMed Central PMCID: PMC2876658.
		Yamamoto A, Kobayashi C, Yamashita S, Miyazawa T, Okabe M, Fukuzawa M, Miyagawa S. Expression of complement regulatory protein on porcine endogenous retrovirus (PERV) depends on molecular size. Transpl Immunol. 2010 May;23(1-2):71-6. doi: 10.1016/j.trim.2010.03.001. Epub 2010 Mar 10. PubMed PMID: 20226243.
		Millard AL, Mueller NJ. Can human viruses infect porcine xenografts? Xenotransplantation. 2010 Jan-Feb;17(1):6-10. doi: 10.1111/j.1399-3089.2009.00566.x. Review. PubMed PMID: 20149184.
		Zhang P, Yu P, Wang W, Zhang L, Li S, Bu H. An effective method for the quantitative detection of porcine endogenous retrovirus in pig tissues. In Vitro Cell Dev Biol Anim. 2010 May;46(5):408-10. doi: 10.1007/s11626-009-9264-8. Epub 2010 Jan 28. PubMed PMID: 20108128.
		Millard AL, Mueller NJ. Critical issues related to porcine xenograft exposure to human viruses: lessons from allotransplantation. Curr Opin Organ Transplant. 2010 Apr;15(2):230-5. doi: 10.1097/MOT.0b013e328336b8f9. Review. PubMed PMID: 20061950.
		Xing XW, Hawthorne WJ, Yi S, Simond DM, Dong Q, Ye B, Tong QJ, Ye Z, Wang W. Investigation of porcine endogenous retrovirus in the conservation population of Ningxiang pig. Transplant Proc. 2009 Dec;41(10):4389-93. doi: 10.1016/j.transproceed.2009.09.051. PubMed PMID: 20005405.
		Klymiuk N, Aigner B, Brem G, Wolf E. Genetic modification of pigs as organ donors for xenotransplantation. Mol Reprod Dev. 2010 Mar;77(3):209-21. doi: 10.1002/mrd.21127. Review. PubMed PMID: 19998476.
		Yu P, Zhang P, Zhang L, Li SF, Cheng JQ, Lu YR, Li YP, Bu H. Studies on long-term infection of human cells with Porcine endogenous retrovirus. Acta Virol. 2009;53(3):169-74. PubMed PMID: 19941398.
		Moon HJ, Kim HK, Park SJ, Lee CS, Song DS, Kang BK, Park BK. Comparison of the age-related porcine endogenous retrovirus (PERV)expression using duplex RT-PCR. J Vet Sci. 2009 Dec;10(4):317-22. PubMed PMID: 19934597; PubMed Central PMCID: PMC2807268.
		Yamamoto A, Nakatsu S, Kondo A, Asato T, Okabe M, Fukuzawa M, Miyagawa S. A newly cloned pig dolichyl-phosphate mannosyl-transferase for preventing the transmission of porcine endogenous retrovirus to human cells. Transpl Int. 2010 Apr 1;23(4):424-31. doi: 10.1111/j.1432-2277.2009.00999.x. Epub 2009 Nov 12. PubMed PMID: 19912589.
		Denner J, Schuurman HJ, Patience C. The International Xenotransplantation Association consensus statement on conditions for undertaking clinical trials of porcine islet products in type 1 diabetes--chapter 5: Strategies to prevent transmission of porcine endogenous retroviruses. Xenotransplantation. 2009 Jul-Aug;16(4):239-48. doi: 10.1111/j.1399-3089.2009.00544.x. PubMed PMID: 19799764.
		Schuurman HJ. The International Xenotransplantation Association consensus statement on conditions for undertaking clinical trials of porcine islet products in type 1 diabetes--chapter 2: Source pigs. Xenotransplantation. 2009 Jul-Aug;16(4):215-22. doi: 10.1111/j.1399-3089.2009.00541.x. PubMed PMID: 19799761.
		Hering BJ, Cooper DK, Cozzi E, Schuurman HJ, Korbutt GS, Denner J, O'Connell PJ, Vanderpool HY, Pierson RN 3rd. The International Xenotransplantation Association consensus statement on conditions for undertaking clinical trials of porcine islet products in type 1 diabetes-- executive summary. Xenotransplantation. 2009 Jul-Aug;16(4):196-202. doi: 10.1111/j.1399-3089.2009.00547.x. PubMed PMID: 1979…
		Jung WY, Kim JE, Jung KC, Jin DI, Moran C, Park EW, Jeon JT, Lee JH. Comparison of PERV genomic locations between Asian and European pigs. Anim Genet. 2010 Feb;41(1):89-92. doi: 10.1111/j.1365-2052.2009.01953.x. Epub 2009 Sep 24. PubMed PMID: 19781037.
		Frühauf JH, Mertsching H, Giri S, Frühauf NR, Bader A. Porcine endogenous retrovirus released by a bioartificial liver infects primary human cells. Liver Int. 2009 Nov;29(10):1553-61. doi: 10.1111/j.1478-3231.2009.02087.x. Epub 2009 Aug 14. PubMed PMID: 19686312.
		Ramsoondar J, Vaught T, Ball S, Mendicino M, Monahan J, Jobst P, Vance A, Duncan J, Wells K, Ayares D. Production of transgenic pigs that express porcine endogenous retrovirus small interfering RNAs. Xenotransplantation. 2009 May-Jun;16(3):164-80. doi: 10.1111/j.1399-3089.2009.00525.x. PubMed PMID: 19566656.
		Yeom SC, Oh BC, Cho SY, Park CG, Lee BC, Lee WJ. Investigation of blood typing method for seoul National University miniature pig. Transplant Proc. 2009 Jun;41(5):1921-6. doi: 10.1016/j.transproceed.2009.01.096. PubMed PMID: 19545757.
		Kim NY, Lee D, Lee J, Park EW, Jung WW, Yang JM, Kim YB. Characterization of the replication-competent porcine endogenous retrovirus class B molecular clone originated from Korean domestic pig. Virus Genes. 2009 Oct;39(2):210-6. doi: 10.1007/s11262-009-0377-7. PubMed PMID: 19543822.
		Scobie L, Takeuchi Y. Porcine endogenous retrovirus and other viruses in xenotransplantation. Curr Opin Organ Transplant. 2009 Apr;14(2):175-9. Review. PubMed PMID: 19469034.
		Dieckhoff B, Kessler B, Jobst D, Kues W, Petersen B, Pfeifer A, Kurth R, Niemann H, Wolf E, Denner J. Distribution and expression of porcine endogenous retroviruses in multi-transgenic pigs generated for xenotransplantation. Xenotransplantation. 2009 Mar-Apr;16(2):64-73. doi: 10.1111/j.1399-3089.2009.00515.x. PubMed PMID: 19392721.
		Prabha MS, Verghese S. Polymerase chain reaction in detection of porcine endogenous retrovirus (PERV) from porcine tissues. Indian J Microbiol. 2009 Mar;49(1):68-71. doi: 10.1007/s12088-009-0002-4. Epub 2009 Apr 21. PubMed PMID: 23100752; PubMed Central PMCID: PMC3450045.
		Specke V, Plesker R, Wood J, Coulibaly C, Suling K, Patience C, Kurth R, Schuurman HJ, Denner J. No in vivo infection of triple immunosuppressed non-human primates after inoculation with high titers of porcine endogenous retroviruses. Xenotransplantation. 2009 Jan-Feb;16(1):34-44. doi: 10.1111/j.1399-3089.2009.00508.x. PubMed PMID: 19243559.
		Huh JW, Kim DS, Ha HS, Ahn K, Chang KT, Cho BW, Kim HS. Identification and molecular characterization of PERV gamma1 long terminal repeats. Mol Cells. 2009 Jan 31;27(1):119-23. doi: 10.1007/s10059-009-0013-3. Epub 2009 Feb 5. PubMed PMID: 19214442.
		Okura E, Ishimaru A, Yamamoto A, Nakatsu S, Shirakura R, Okabe M, Sawa Y, Fukuzawa M, Okumura M, Miyagawa S. Differential human serum-mediated neutralization of PERV released from pig cells transfected with variants of hDAF. Xenotransplantation. 2008 Nov-Dec;15(6):365-73. doi: 10.1111/j.1399-3089.2008.00496.x. PubMed PMID: 19152664.
		Yu P, Zhang L, Li SF, Cheng JQ, Lu YR, Li YP, Bu H. Transmission of porcine endogenous retrovirus to human cells in nude mouse. Acta Virol. 2008;52(4):257-60. PubMed PMID: 19143483.
		Lee D, Kim NY, Bae GE, Lee HJ, Kwon M, Kim SS, Lee HT, Yang JM, Kim YB. Transmissible infection of human 293T cells with porcine endogenous retroviruses subgroup a from NIH-miniature pig. Transplant Proc. 2008 Dec;40(10):3742-5. doi: 10.1016/j.transproceed.2008.09.035. PubMed PMID: 19100479.
		Irgang M, Laue C, Velten F, Kurth R, Schrezenmeier J, Denner J. No evidence for PERV release by islet cells from German landrace pigs. Ann Transplant. 2008;13(4):59-66. PubMed PMID: 19034225.
		Ekser B, Rigotti P, Gridelli B, Cooper DK. Xenotransplantation of solid organs in the pig-to-primate model. Transpl Immunol. 2009 Jun;21(2):87-92. doi: 10.1016/j.trim.2008.10.005. Epub 2008 Oct 26. Review. PubMed PMID: 18955143.
		Issa NC, Wilkinson RA, Griesemer A, Cooper DK, Yamada K, Sachs DH, Fishman JA. Absence of replication of porcine endogenous retrovirus and porcine lymphotropic herpesvirus type 1 with prolonged pig cell microchimerism after pig-to-baboon xenotransplantation. J Virol. 2008 Dec;82(24):12441-8. doi: 10.1128/JVI.01278-08. Epub 2008 Oct 1. PubMed PMID: 18829759; PubMed Central PMCID: PMC2593320.
		Wilson CA. Porcine endogenous retroviruses and xenotransplantation. Cell Mol Life Sci. 2008 Nov;65(21):3399-412. doi: 10.1007/s00018-008-8498-z. Review. PubMed PMID: 18818871.
		Garkavenko O, Dieckhoff B, Wynyard S, Denner J, Elliott RB, Tan PL, Croxson MC. Absence of transmission of potentially xenotic viruses in a prospective pig to primate islet xenotransplantation study. J Med Virol. 2008 Nov;80(11):2046-52. doi: 10.1002/jmv.21272. PubMed PMID: 18814261.
		Nikitin SV, Iudin NS, Kniazev SP, Aĭtnazarov RB, Kobzev VF, Bekenev VA, Savvina MA, Ermolaev VI. [Frequency of chromosomes carrying endogenous retroviruses in the populations of domestic pig and wild boar]. Genetika. 2008 Jun;44(6):789-97. Russian. PubMed PMID: 18727389.
		Mattiuzzo G, Scobie L, Takeuchi Y. Strategies to enhance the safety profile of xenotransplantation: minimizing the risk of viral zoonoses. Curr Opin Organ Transplant. 2008 Apr;13(2):184-8. doi: 10.1097/MOT.0b013e3282f7961e. PubMed PMID: 18685301.
		Denner J. Recombinant porcine endogenous retroviruses (PERV-A/C): a new risk for xenotransplantation? Arch Virol. 2008;153(8):1421-6. doi: 10.1007/s00705-008-0141-7. Epub 2008 Jun 27. Review. PubMed PMID: 18584115.
		Dörrschuck E, Münk C, Tönjes RR. APOBEC3 proteins and porcine endogenous retroviruses. Transplant Proc. 2008 May;40(4):959-61. doi: 10.1016/j.transproceed.2008.03.032. PubMed PMID: 18555089.
		Argaw T, Figueroa M, Salomon DR, Wilson CA. Identification of residues outside of the receptor binding domain that influence the infectivity and tropism of porcine endogenous retrovirus. J Virol. 2008 Aug;82(15):7483-91. doi: 10.1128/JVI.00295-08. Epub 2008 May 28. PubMed PMID: 18508891; PubMed Central PMCID: PMC2493329.
		Lee D, Lee J, Park N, Oh YK, Kwon M, Kim YB. Analysis of natural recombination in porcine endogenous retrovirus envelope genes. J Microbiol Biotechnol. 2008 Mar;18(3):585-90. PubMed PMID: 18388481.
		Garkavenko O, Wynyard S, Nathu D, Muzina M, Muzina Z, Scobie L, Hector RD, Croxson MC, Tan P, Elliott BR. Porcine endogenous retrovirus transmission characteristics from a designated pathogen-free herd. Transplant Proc. 2008 Mar;40(2):590-3. doi: 10.1016/j.transproceed.2008.01.051. PubMed PMID: 18374137.
		Denner J. Is porcine endogenous retrovirus (PERV) transmission still relevant? Transplant Proc. 2008 Mar;40(2):587-9. doi: 10.1016/j.transproceed.2007.12.026. PubMed PMID: 18374136.
		Denner J, Specke V, Karlas A, Chodnevskaja I, Meyer T, Moskalenko V, Kurth R, Ulrichs K. No transmission of porcine endogenous retroviruses (PERVs) in a long-term pig to rat xenotransplantation model and no infection of immunosuppressed rats. Ann Transplant. 2008;13(1):20-31. PubMed PMID: 18344940.
		Dieckhoff B, Petersen B, Kues WA, Kurth R, Niemann H, Denner J. Knockdown of porcine endogenous retrovirus (PERV) expression by PERV-specific shRNA in transgenic pigs. Xenotransplantation. 2008 Feb;15(1):36-45. doi: 10.1111/j.1399-3089.2008.00442.x. PubMed PMID: 18333912.
		Petersen B, Carnwath JW, Niemann H. The perspectives for porcine-to-human xenografts. Comp Immunol Microbiol Infect Dis. 2009 Mar;32(2):91-105. doi: 10.1016/j.cimid.2007.11.014. Epub 2008 Feb 15. Review. PubMed PMID: 18280567.
		Garkavenko O, Wynyard S, Nathu D, Simond D, Muzina M, Muzina Z, Scobie L, Hector RD, Croxson MC, Tan P, Elliott BR. Porcine endogenous retrovirus (PERV) and its transmission characteristics: a study of the New Zealand designated pathogen-free herd. Cell Transplant. 2008;17(12):1381-8. PubMed PMID: 19364075.
		Mattiuzzo G, Matouskova M, Takeuchi Y. Differential resistance to cell entry by porcine endogenous retrovirus subgroup A in rodent species. Retrovirology. 2007 Dec 14;4:93. PubMed PMID: 18081925; PubMed Central PMCID: PMC2241639.
		Ye Z, Xing XW, Tong QJ, Rong PF, Wang W. [Potential risk of porcine endogenous retrovirus cross-species transmission in neonatal pig islets under xenotransplanted condition]. Zhong Nan Da Xue Xue Bao Yi Xue Ban. 2007 Oct;32(5):747-52. Chinese. PubMed PMID: 18007064.
		Schuurman HJ, Pierson RN 3rd. Progress towards clinical xenotransplantation. Front Biosci. 2008 Jan 1;13:204-20. Review. PubMed PMID: 17981539.
		Klymiuk N, Wolf E, Aigner B. Concise classification of the genomic porcine endogenous retroviral gamma1 load to defined lineages. Virology. 2008 Feb 5;371(1):175-84. Epub 2007 Oct 26. PubMed PMID: 17964627.
		Jónsson SR, LaRue RS, Stenglein MD, Fahrenkrug SC, Andrésdóttir V, Harris RS. The restriction of zoonotic PERV transmission by human APOBEC3G. PLoS One. 2007 Sep 12;2(9):e893. PubMed PMID: 17849022; PubMed Central PMCID: PMC1963317.
		Ha HS, Huh JW, Kim DS, Kang DW, Cho BW, Kim HS. Promoter activity of the long terminal repeats of porcine endogenous retroviruses of the Korean domestic pig. Mol Cells. 2007 Aug 31;24(1):148-51. PubMed PMID: 17846510.
		Huh JW, Cho BW, Kim DS, Ha HS, Noh YN, Yi JM, Lee WH, Kim HS. Long terminal repeats of porcine endogenous retroviruses in Sus scrofa. Arch Virol. 2007;152(12):2271-6. Epub 2007 Sep 7. PubMed PMID: 17823769.
		Hermida-Prieto M, Domenech N, Moscoso I, Diaz T, Ishii J, Salomon DR, Mañez R. Lack of cross-species transmission of porcine endogenous retrovirus (PERV) to transplant recipients and abattoir workers in contact with pigs. Transplantation. 2007 Aug 27;84(4):548-50. PubMed PMID: 17713442.
		Wu J, Ma Y, Lv M, Yang Y, Guo Y, Yu X, Tian K, Zhang J. Large-scale survey of porcine endogenous retrovirus in Chinese miniature pigs. Comp Immunol Microbiol Infect Dis. 2008 Jul;31(4):367-71. Epub 2007 Aug 8. PubMed PMID: 17689611.
		Lang'at D, Mwenda JM. Endogenous Retroviruses: What risks do they pose in xenotransplant. Afr J Health Sci. 2001 Jan-Jun;8(1-2):24-32. PubMed PMID: 17650044.
		Miyagawa S. [Clinical xenotransplantation]. Nihon Rinsho Meneki Gakkai Kaishi. 2007 Jun;30(3):174-84. Review. Japanese. PubMed PMID: 17603258.
		Groth CG. The potential advantages of transplanting organs from pig to man: A transplant Surgeon's view. Indian J Urol. 2007 Jul;23(3):305-9. doi: 10.4103/0970-1591.33729. PubMed PMID: 19718335; PubMed Central PMCID: PMC2721611.
		Morozov VA, Morozov AV, Lagaye S. Endogenous JSRV-like proviruses in domestic cattle: analysis of sequences and transcripts. Virology. 2007 Oct 10;367(1):59-70. Epub 2007 Jun 13. PubMed PMID: 17570457.
		Hector RD, Meikle S, Grant L, Wilkinson RA, Fishman JA, Scobie L. Pre-screening of miniature swine may reduce the risk of transmitting human tropic recombinant porcine endogenous retroviruses. Xenotransplantation. 2007 May;14(3):222-6. PubMed PMID: 17489862.
		Roux FA, Saï P, Deschamps JY. Some ethical issues regarding xenotransfusion. Xenotransplantation. 2007 May;14(3):217-21. PubMed PMID: 17489861.
		Groth CG. Prospects in xenotransplantation: a personal view. Transplant Proc. 2007 Apr;39(3):685-7. PubMed PMID: 17445573.
		Dieckhoff B, Puhlmann J, Büscher K, Hafner-Marx A, Herbach N, Bannert N, Büttner M, Wanke R, Kurth R, Denner J. Expression of porcine endogenous retroviruses (PERVs) in melanomas of Munich miniature swine (MMS) Troll. Vet Microbiol. 2007 Jul 20;123(1-3):53-68. Epub 2007 Feb 27. PubMed PMID: 17418507.
		Groth CG. Prospects of using organs and cells from pigs for transplantation into humans. Zhong Nan Da Xue Xue Bao Yi Xue Ban. 2007 Feb;32(1):20-5. PubMed PMID: 17344582.
		Popp SK, Mann DA, Milburn PJ, Gibbs AJ, McCullagh PJ, Wilson JD, Tönjes RR, Simeonovic CJ. Transient transmission of porcine endogenous retrovirus to fetal lambs after pig islet tissue xenotransplantation. Immunol Cell Biol. 2007 Apr-May;85(3):238-48. Epub 2007 Jan 16. PubMed PMID: 17228325.
		Chiang CY, Pan YR, Chou LF, Fang CY, Wang SR, Yang CY, Chang HY. Functional epitopes on porcine endogenous retrovirus envelope protein interacting with neutralizing antibody combining sites. Virology. 2007 May 10;361(2):364-71. Epub 2007 Jan 10. PubMed PMID: 17222436.
		Xing XW, Xue LQ, Mo ZH, Huang SQ, Wang W. [Porcine endogenous retrovirus in Daweizi pigs in Hunan]. Zhong Nan Da Xue Xue Bao Yi Xue Ban. 2006 Dec;31(6):838-42. Chinese. PubMed PMID: 17213579.
		Lee D, Lee J, Uhm SJ, Lee YS, Park MJ, Park HY, Kwon M, Lee HT, Kim YB. Molecular characterization of the porcine endogenous retrovirus subclass A and B envelope gene from pigs. Transplant Proc. 2006 Nov;38(9):3066-9. PubMed PMID: 17112901.
		Dieckhoff B, Karlas A, Hofmann A, Kues WA, Petersen B, Pfeifer A, Niemann H, Kurth R, Denner J. Inhibition of porcine endogenous retroviruses (PERVs) in primary porcine cells by RNA interference using lentiviral vectors. Arch Virol. 2007;152(3):629-34. Epub 2006 Nov 16. PubMed PMID: 17106623.
		Preuss T, Fischer N, Boller K, Tönjes RR. Isolation and characterization of an infectious replication-competent molecular clone of ecotropic porcine endogenous retrovirus class C. J Virol. 2006 Oct;80(20):10258-61. PubMed PMID: 17005704; PubMed Central PMCID: PMC1617276.
		Li Z, Ping Y, Shengfu L, Youping L, Jingqiu C, Hong B. In vivo screening of porcine endogenous retrovirus in Chinese Banna minipig inbred. Transplant Proc. 2006 Sep;38(7):2261-3. PubMed PMID: 16980059.
		Li Z, Ping Y, Shengfu L, Youping L, Jingqiu C, Hong B. Phylogenetic analysis of porcine endogenous retroviruses expressed in Chinese pigs based on envelope sequences. Transplant Proc. 2006 Sep;38(7):2252-7. PubMed PMID: 16980057.
		Xing XW, Xue LQ, Huang SQ, Wang W. [Research of porcine endogenous retrovirus in Shaziling pigs]. Yi Chuan. 2006 Jul;28(7):799-804. Chinese. PubMed PMID: 16825165.
		Miyagawa S, Nakatsu S, Hazama K, Nakagawa T, Kondo A, Matsunami K, Yamamoto A, Yamada J, Miyazawa T, Shirakura R. A novel strategy for preventing PERV transmission to human cells by remodeling the viral envelope glycoprotein. Xenotransplantation. 2006 May;13(3):258-63. PubMed PMID: 16756569.
		Martina Y, Marcucci KT, Cherqui S, Szabo A, Drysdale T, Srinivisan U, Wilson CA, Patience C, Salomon DR. Mice transgenic for a human porcine endogenous retrovirus receptor are susceptible to productive viral infection. J Virol. 2006 Apr;80(7):3135-46. Erratum in: J Virol. 2006 May;80(10):5100. PubMed PMID: 16537582; PubMed Central PMCID: PMC1440412.
		Klymiuk N, Müller M, Brem G, Aigner B. Phylogeny, recombination and expression of porcine endogenous retrovirus gamma2 nucleotide sequences. J Gen Virol. 2006 Apr;87(Pt 4):977-86. PubMed PMID: 16528048.
		Machnik G, Sypniewski D, Wydmuch Z, Cholewa K, Mazurek U, Wilczok T, Smorag Z, Pacha J. Sequence analysis of proviral DNA of porcine endogenous retroviruses. Transplant Proc. 2005 Dec;37(10):4610-4. PubMed PMID: 16387182.
		Yu P, Liu J, Zhang L, Li SF, Bu H, Li YP, Cheng JQ, Lu YR, Long D. [Intergration and epression of porcine endogenous retrovinus in the immortal cell line of Banna Minipig Inberd Line-Mesenhymal Stem Cells]. Sichuan Da Xue Xue Bao Yi Xue Ban. 2005 Nov;36(6):770-2. Chinese. PubMed PMID: 16334548.
		Cox A, Zhong R. Current advances in xenotransplantation. Hepatobiliary Pancreat Dis Int. 2005 Nov;4(4):490-4. Review. PubMed PMID: 16286250.
		Gu CH, Liu WY, Yi DH, Wang YY, Zhang JB, Wei XY, Ouyang H, Liu XG, Tan HM. [Effects of modified acellularization process on porcine endogenous retroviruses in porcine aorta valves]. Zhonghua Yi Xue Za Zhi. 2005 Jul 13;85(26):1827-30. Chinese. PubMed PMID: 16253188.
		Sypniewski D, Machnik G, Mazurek U, Wilczok T, Smorag Z, Jura J, Gajda B. Distribution of porcine endogenous retroviruses (PERVs) DNA in organs of a domestic pig. Ann Transplant. 2005;10(2):46-51. PubMed PMID: 16218033.
		Schmidt P, Forsman A, Andersson G, Blomberg J, Korsgren O. Pig islet xenotransplantation: activation of porcine endogenous retrovirus in the immediate post-transplantation period. Xenotransplantation. 2005 Nov;12(6):450-6. PubMed PMID: 16202068.
		Liu Q, Liu Z, Dalakas E. Prevalence of porcine endogenous retrovirus in Chinese pig breeds and in patients treated with a porcine liver cell-based bioreactor. World J Gastroenterol. 2005 Aug 14;11(30):4727-30. PubMed PMID: 16094718.
		Yu P, Zhang L, Bu H, Li SF, Li YP, Cheng JQ. [Preliminary study on human embryonic kidney cell line HEK-293 after porcine endogenous retrovirus infection]. Zhonghua Bing Li Xue Za Zhi. 2005 Apr;34(4):220-3. Chinese. PubMed PMID: 16091176.
		Martina Y, Kurian S, Cherqui S, Evanoff G, Wilson C, Salomon DR. Pseudotyping of porcine endogenous retrovirus by xenotropic murine leukemia virus in a pig islet xenotransplantation model. Am J Transplant. 2005 Aug;5(8):1837-47. PubMed PMID: 15996230.
		Simeonovic CJ, Ziolkowski AF, Popp SK, Milburn PJ, Lynch CA, Hamilton P, Harris K, Brown DJ, Bain SA, Wilson JD, Gibbs AJ. Porcine endogenous retrovirus encodes xenoantigens involved in porcine cellular xenograft rejection by mice. Transplantation. 2005 Jun 27;79(12):1674-82. PubMed PMID: 15973168.
		Winkler ME, Winkler M, Burian R, Hecker J, Loss M, Przemeck M, Lorenz R, Patience C, Karlas A, Sommer S, Denner J, Martin U. Analysis of pig-to-human porcine endogenous retrovirus transmission in a triple-species kidney xenotransplantation model. Transpl Int. 2005 May;17(12):848-58. Epub 2005 Apr 29. PubMed PMID: 15864489.
		Miyagawa S, Nakatsu S, Nakagawa T, Kondo A, Matsunami K, Hazama K, Yamada J, Tomonaga K, Miyazawa T, Shirakura R. Prevention of PERV infections in pig to human xenotransplantation by the RNA interference silences gene. J Biochem. 2005 Apr;137(4):503-8. PubMed PMID: 15858174.
		Liu WY, Jin ZX, Gu CH, Zhao DE, Tan HM. [Construction and evaluation of the property of decellular porcine aortic valve]. Zhonghua Yi Xue Za Zhi. 2005 Feb 2;85(5):324-7. Chinese. PubMed PMID: 15854509.
		Klymiuk N, Aigner B. Reliable classification and recombination analysis of porcine endogenous retroviruses. Virus Genes. 2005 May;30(3):357-62. PubMed PMID: 15830154.
		Moscoso I, Hermida-Prieto M, Mañez R, Lopez-Pelaez E, Centeno A, Diaz TM, Domenech N. Lack of cross-species transmission of porcine endogenous retrovirus in pig-to-baboon xenotransplantation with sustained depletion of anti-alphagal antibodies. Transplantation. 2005 Apr 15;79(7):777-82. PubMed PMID: 15818319.
		Irgang M, Karlas A, Laue C, Specke V, Tacke SJ, Kurth R, Schrezenmeir J, Denner J. Porcine endogenous retroviruses PERV-A and PERV-B infect neither mouse cells in vitro nor SCID mice in vivo. Intervirology. 2005;48(2-3):167-73. PubMed PMID: 15812191.
		Hazama K, Miyagawa S, Yamamoto A, Kubo T, Miyazawa T, Tomonaga K, Watanabe R, Okumura M, Matsuda H, Shirakura R. The effect of complement regulatory protein expression on pig endothelial cells to porcine endogenous retrovirus lyses by human sera. Transplant Proc. 2005 Jan-Feb;37(1):503-5. PubMed PMID: 15808690.
		Yu P, Zhang L, Li SF, Li YP, Cheng JQ, Lu YR, Bu H. Long-term effects on HEK-293 cell line after co-culture with porcine endogenous retrovirus. Transplant Proc. 2005 Jan-Feb;37(1):496-9. PubMed PMID: 15808688.
		Zhang L, Yu P, Bu H, Li S, Li Y, Cheng J. Porcine endogenus retrovirus transmission from pig cell line to mouse tissues but not human cells in nude mice. Transplant Proc. 2005 Jan-Feb;37(1):493-5. PubMed PMID: 15808687.
		Elliott RB, Escobar L, Calafiore R, Basta G, Garkavenko O, Vasconcellos A, Bambra C. Transplantation of micro- and macroencapsulated piglet islets into mice and monkeys. Transplant Proc. 2005 Jan-Feb;37(1):466-9. PubMed PMID: 15808678.
		Nishitai R, Ikai I, Shiotani T, Katsura N, Matsushita T, Yamanokuchi S, Matsuo K, Sugimoto S, Yamaoka Y. Absence of PERV infection in baboons after transgenic porcine liver perfusion. J Surg Res. 2005 Mar;124(1):45-51. PubMed PMID: 15734478.
		Chiang CY, Chang JT, Lin MS, Wang SR, Chang HY. Characterization of a monoclonal antibody specific to the Gag protein of porcine endogenous retrovirus and its application in detecting the virus infection. Virus Res. 2005 Mar;108(1-2):139-48. PubMed PMID: 15681064.
		Yu YJ. [Genetic modification of porcine organs for human in xenotransplantation]. Yi Chuan. 2003 Sep;25(5):596-600. Chinese. PubMed PMID: 15639939.
		Ding SC, Chen YS, Wei H, Shang HT, Liu P. [Analysis of presence and difference of sequence of porcine endogenous retrovirus in DNA genomes from peripheral blood white cells of pig and mRNA in tissues from mini-pigs]. Shi Yan Sheng Wu Xue Bao. 2004 Oct;37(5):351-8. Chinese. PubMed PMID: 15636362.
		Lu Q, Han H, Lian Z, Li N, Zhang Q, Zhao Z, Pei D, Zhang X, Wu C. The screening and identification of endogenous retrovirus free CEMPs. Sci China C Life Sci. 2004 Dec;47(6):562-6. PubMed PMID: 15620113.
		Niebert M, Tönjes RR. Evolutionary spread and recombination of porcine endogenous retroviruses in the suiformes. J Virol. 2005 Jan;79(1):649-54. PubMed PMID: 15596862; PubMed Central PMCID: PMC538718.
		Zhang L, Yu P, Li S, Li Y, Zeng Y, Cheng J, Bu H. Phylogenetic analysis of porcine endogenous retrovirus variation in three Chinese pigs. Transplant Proc. 2004 Oct;36(8):2495-7. PubMed PMID: 15561294.
		Yu P, Zhang L, Li S, Li Y, Cheng J, Lu Y, Zeng Y, Bu H. Screening and analysis of porcine endogenous retrovirus in Chinese Banna minipig inbred line. Transplant Proc. 2004 Oct;36(8):2485-7. PubMed PMID: 15561290.
		Garkavenko O, Croxson MC, Irgang M, Karlas A, Denner J, Elliott RB. Monitoring for presence of potentially xenotic viruses in recipients of pig islet xenotransplantation. J Clin Microbiol. 2004 Nov;42(11):5353-6. PubMed PMID: 15528741; PubMed Central PMCID: PMC525280.
		Ding SC, Chen YS, Wei H, Shang HT, Liu P, Li HY. [Studies on the infectivity by porcine endogenous retrovirus with porcine skin fibroblast in vitro and in vivo]. Yi Chuan Xue Bao. 2004 Aug;31(8):813-8. Chinese. PubMed PMID: 15481536.
		Ferrari M, Corradi A, Petronini PG, Tosini A, Toniolo A, Robotti C, Moratti R. Evaluation of endogenous pig retrovirus expression and of tumorigenicity in nude mice. Vet Res Commun. 2004 Aug;28 Suppl 1:287-90. PubMed PMID: 15372979.
		Li Z, Ping Y, Shengfu L, Hong B, Youping L, Yangzhi Z, Jingqiu C. Phylogenetic relationship of porcine endogenous retrovirus (PERV) in Chinese pigs with some type C retroviruses. Virus Res. 2004 Oct;105(2):167-73. PubMed PMID: 15351490.
		Yang YG, Wood JC, Lan P, Wilkinson RA, Sykes M, Fishman JA, Patience C. Mouse retrovirus mediates porcine endogenous retrovirus transmission into human cells in long-term human-porcine chimeric mice. J Clin Invest. 2004 Sep;114(5):695-700. PubMed PMID: 15343388; PubMed Central PMCID: PMC514590.
		Fishman JA, Patience C. Xenotransplantation: infectious risk revisited. Am J Transplant. 2004 Sep;4(9):1383-90. Review. PubMed PMID: 15307825.
		Vijayalakshmi V, Naseem B, Khan AA, Capoor AK, Habibullah CM. Comparison of biochemical and cytotoxic functions of hepatocytes from goat, pig and human fetuses. J Gastroenterol Hepatol. 2004 Sep;19(9):1029-35. PubMed PMID: 15304121.
		Scobie L, Taylor S, Logan NA, Meikle S, Onions D, Patience C, Quinn G. Characterization of germline porcine endogenous retroviruses from Large White pig. J Gen Virol. 2004 Aug;85(Pt 8):2421-8. PubMed PMID: 15269384.
		Kuddus RH, Metes DM, Nalesnik MA, Logar AJ, Rao AS, Fung JJ. Porcine cell microchimerism but lack of productive porcine endogenous retrovirus (PERV) infection in naive and humanized SCID-beige mice treated with porcine peripheral blood mononuclear cells. Transpl Immunol. 2004 Jun-Jul;13(1):15-24. PubMed PMID: 15203124.
		Goto M, Maeda A, Elfman L, Suling KM, Wood JC, Patience C, Groth CG, Wennberg L. No transmission of porcine endogenous retrovirus after transplantation of adult porcine islets into diabetic nude mice and immunosuppressed rats. Xenotransplantation. 2004 Jul;11(4):340-6. PubMed PMID: 15196128.
		Alisky JM. Xenografts are an achievable breakthrough. Med Hypotheses. 2004;63(1):92-7. PubMed PMID: 15193356.
		Wang SR, Chang JT, Lin MS, Chiang CY, Chang HY. Establishing the reactivity of monoclonal antibodies against porcine endogenous retrovirus envelope protein. Intervirology. 2004;47(2):93-101. PubMed PMID: 15192273.
		Magre S, Takeuchi Y, Langford G, Richards A, Patience C, Weiss R. Reduced sensitivity to human serum inactivation of enveloped viruses produced by pig cells transgenic for human CD55 or deficient for the galactosyl-alpha(1-3) galactosyl epitope. J Virol. 2004 Jun;78(11):5812-9. PubMed PMID: 15140979; PubMed Central PMCID: PMC415822.
		Quinn G, Wood JC, Ryan DJ, Suling KM, Moran KM, Kolber-Simonds DL, Greenstein JL, Schuurman HJ, Hawley RJ, Patience C. Porcine endogenous retrovirus transmission characteristics of galactose alpha1-3 galactose-deficient pig cells. J Virol. 2004 Jun;78(11):5805-11. PubMed PMID: 15140978; PubMed Central PMCID: PMC415821.
		Niebert M, Kurth R, Tönjes RR. Retroviral safety: analyses of phylogeny, prevalence and polymorphisms of porcine endogenous retroviruses. Ann Transplant. 2003;8(3):56-64. PubMed PMID: 15114941.
		Denner J. Porcine endogenous retroviruses (PERVs) and xenotransplantation: screening for transmission in several clinical trials and in experimental models using non-human primates. Ann Transplant. 2003;8(3):39-48. PubMed PMID: 15114938.
		Simon AR, Templin C, Schröder C, Laaff G, Tessmann R, Winkler ME, Tacke S, Denner J, Lapin B, Chikobava M, Patience C, Steinhoff G, Agrba VZ, Haverich A, Martin U. No evidence for productive PERV infection of baboon cells in in vivo infection model. Ann Transplant. 2003;8(3):24-34. PubMed PMID: 15114936.
		Edamura K, Nasu K, Iwami Y, Nishimura R, Ogawa H, Sasaki N, Ohgawara H. Prevalence of porcine endogenous retrovirus in domestic pigs in Japan and its potential infection in dogs xenotransplanted with porcine pancreatic islet cells. J Vet Med Sci. 2004 Feb;66(2):129-35. PubMed PMID: 15031539.
		Cozzi E, Ancona E. Xenotransplantation, where do we stand? J Nephrol. 2003 Nov-Dec;16 Suppl 7:S16-21. Review. PubMed PMID: 14733295.
		Argaw T, Colon-Moran W, Wilson CA. Limited infection without evidence of replication by porcine endogenous retrovirus in guinea pigs. J Gen Virol. 2004 Jan;85(Pt 1):15-9. PubMed PMID: 14718614.
		Ogle BM, Butters KA, Plummer TB, Ring KR, Knudsen BE, Litzow MR, Cascalho M, Platt JL. Spontaneous fusion of cells between species yields transdifferentiation and retroviral transfer in vivo. FASEB J. 2004 Mar;18(3):548-50. Epub 2004 Jan 8. PubMed PMID: 14715691.
		Kurihara T, Miyazawa T, Miyagawa S, Tomonaga K, Hazama K, Yamada J, Shirakura R, Matsuura Y. Sensitivity to human serum of gammaretroviruses produced from pig endothelial cells transduced with glycosyltransferase genes. Xenotransplantation. 2003 Nov;10(6):562-8. PubMed PMID: 14708522.
		Kobayashi N, Okitsu T, Nakaji S, Tanaka N. Hybrid bioartificial liver: establishing a reversibly immortalized human hepatocyte line and developing a bioartificial liver for practical use. J Artif Organs. 2003;6(4):236-44. Review. PubMed PMID: 14691665.
		Tönjes RR, Niebert M. Relative age of proviral porcine endogenous retrovirus sequences in Sus scrofa based on the molecular clock hypothesis. J Virol. 2003 Nov;77(22):12363-8. PubMed PMID: 14581574; PubMed Central PMCID: PMC254287.
		van de Kerkhove MP, Di Florio E, Scuderi V, Mancini A, Belli A, Bracco A, Scala D, Scala S, Zeuli L, Di Nicuolo G, Amoroso P, Calise F, Chamuleau RA. Bridging a patient with acute liver failure to liver transplantation by the AMC-bioartificial liver. Cell Transplant. 2003;12(6):563-8. PubMed PMID: 14579924.
		Ferrari M, Losio MN, Corradi A, Vittori S, Tosini A. Characterization of endogenous retroviruses in pig cell cultures. Vet Res Commun. 2003 Sep;27 Suppl 1:703-5. PubMed PMID: 14535502.
		Hazama K, Miyagawa S, Miyazawa T, Yamada J, Tomonaga K, Ota M, Matsuda H, Shirakura R. The significance of N-linked glycosylation in pig endogenous retrovirus infectivity. Biochem Biophys Res Commun. 2003 Oct 17;310(2):327-33. PubMed PMID: 14521913.
		Niebert M, Tönjes RR. Analyses of prevalence and polymorphisms of six replication-competent and chromosomally assigned porcine endogenous retroviruses in individual pigs and pig subspecies. Virology. 2003 Sep 1;313(2):427-34. PubMed PMID: 12954210.
		Zhang L, Bu H, Li S, Yu P, Li Y, Cheng J. [Analysis of subtype of porcine endogenous retrovirus in two species of Chinese pigs]. Sichuan Da Xue Xue Bao Yi Xue Ban. 2003 Apr;34(2):197-9. Chinese. PubMed PMID: 12947687.
		Magre S, Takeuchi Y, Bartosch B. Xenotransplantation and pig endogenous retroviruses. Rev Med Virol. 2003 Sep-Oct;13(5):311-29. Review. PubMed PMID: 12931341.
		Xu H, Sharma A, Okabe J, Cui C, Huang L, Wei YY, Wan H, Lei Y, Logan JS, Levy MF, Byrne GW. Serologic analysis of anti-porcine endogenous retroviruses immune responses in humans after ex vivo transgenic pig liver perfusion. ASAIO J. 2003 Jul-Aug;49(4):407-16. PubMed PMID: 12918582.
		Gorbovitskaia M, Liu Z, Bourgeaux N, Li N, Lian Z, Chardon P, Rogel-Gaillard C. Characterization of two porcine endogenous retrovirus integration loci and variability in pigs. Immunogenetics. 2003 Jul;55(4):262-70. Epub 2003 Jun 24. PubMed PMID: 12827326.
		McKane BW, Ramachandran S, Yang J, Xu XC, Mohanakumar T. Xenoreactive anti-Galalpha(1,3)Gal antibodies prevent porcine endogenous retrovirus infection of human in vivo. Hum Immunol. 2003 Jul;64(7):708-17. PubMed PMID: 12826373.
		Fujita F, Yamashita-Futsuki I, Eguchi S, Kamohara Y, Fujioka H, Yanaga K, Furui J, Moriuchi R, Kanematsu T, Katamine S. Inactivation of porcine endogenous retrovirus by human serum as a function of complement activated through the classical pathway. Hepatol Res. 2003 Jun;26(2):106-113. PubMed PMID: 12809937.
		Ericsson TA, Takeuchi Y, Templin C, Quinn G, Farhadian SF, Wood JC, Oldmixon BA, Suling KM, Ishii JK, Kitagawa Y, Miyazawa T, Salomon DR, Weiss RA, Patience C. Identification of receptors for pig endogenous retrovirus. Proc Natl Acad Sci U S A. 2003 May 27;100(11):6759-64. Epub 2003 May 9. PubMed PMID: 12740431; PubMed Central PMCID: PMC164520.
		Avidan O, Loya S, Tönjes RR, Sevilya Z, Hizi A. Expression and characterization of a recombinant novel reverse transcriptase of a porcine endogenous retrovirus. Virology. 2003 Mar 15;307(2):341-57. PubMed PMID: 12667803.
		Tacke SJ, Specke V, Denner J. Differences in release and determination of subtype of porcine endogenous retroviruses produced by stimulated normal pig blood cells. Intervirology. 2003;46(1):17-24. PubMed PMID: 12566695.
		Ferrari M, Scalvini A, Losio MN, Corradi A, Soncini M, Bignotti E, Milanesi E, Ajmone-Marsan P, Barlati S, Bellotti D, Tonelli M. Establishment and characterization of two new pig cell lines for use in virological diagnostic laboratories. J Virol Methods. 2003 Feb;107(2):205-12. PubMed PMID: 12505635.
		Klymiuk N, Müller M, Brem G, Aigner B. Characterization of porcine endogenous retrovirus gamma pro-pol nucleotide sequences. J Virol. 2002 Nov;76(22):11738-43. PubMed PMID: 12388734; PubMed Central PMCID: PMC136799.
		Ritzhaupt A, Van Der Laan LJ, Salomon DR, Wilson CA. Porcine endogenous retrovirus infects but does not replicate in nonhuman primate primary cells and cell lines. J Virol. 2002 Nov;76(22):11312-20. PubMed PMID: 12388691; PubMed Central PMCID: PMC136785.
		Argaw T, Ritzhaupt A, Wilson CA. Development of a real time quantitative PCR assay for detection of porcine endogenous retrovirus. J Virol Methods. 2002 Oct;106(1):97-106. Erratum in: J Virol Methods. 2003 Aug;111(2):165. PubMed PMID: 12367734.
		Dorling A. Clinical xenotransplantation: pigs might fly? Am J Transplant. 2002 Sep;2(8):695-700. Review. PubMed PMID: 12243490.
		Bartosch B, Weiss RA, Takeuchi Y. PCR-based cloning and immunocytological titration of infectious porcine endogenous retrovirus subgroup A and B. J Gen Virol. 2002 Sep;83(Pt 9):2231-40. PubMed PMID: 12185278.
		Specke V, Schuurman HJ, Plesker R, Coulibaly C, Ozel M, Langford G, Kurth R, Denner J. Virus safety in xenotransplantation: first exploratory in vivo studies in small laboratory animals and non-human primates. Transpl Immunol. 2002 May;9(2-4):281-8. PubMed PMID: 12180842.
		Mollnes TE, Fiane AE. Role of complement in xenotransplantation. Allergy. 2002;57 Suppl 72:75-8. PubMed PMID: 12144560.
		Martin U, Tacke SJ, Simon AR, Schröder C, Wiebe K, Lapin B, Haverich A, Denner J, Steinhoff G. Absence of PERV specific humoral immune response in baboons after transplantation of porcine cells or organs. Transpl Int. 2002 Jul;15(7):361-8. Epub 2002 Jun 22. PubMed PMID: 12122513.
		Clémenceau B, Jégou D, Martignat L, Saï P. Microchimerism and transmission of porcine endogenous retrovirus from a pig cell line or specific pathogen-free pig islets to mouse tissues and human cells during xenografts in nude mice. Diabetologia. 2002 Jun;45(6):914-23. Epub 2002 May 15. PubMed PMID: 12107737.
		Blusch JH, Patience C, Martin U. Pig endogenous retroviruses and xenotransplantation. Xenotransplantation. 2002 Jul;9(4):242-51. Review. PubMed PMID: 12060460.
		Lee JH, Webb GC, Allen RD, Moran C. Characterizing and mapping porcine endogenous retroviruses in Westran pigs. J Virol. 2002 Jun;76(11):5548-56. PubMed PMID: 11991983; PubMed Central PMCID: PMC137029.
		Tucker A, Belcher C, Moloo B, Bell J, Mazzulli T, Humar A, Hughes A, McArdle P, Talbot A. The production of transgenic pigs for potential use in clinical xenotransplantation: microbiological evaluation. Xenotransplantation. 2002 May;9(3):191-202. PubMed PMID: 11983017.
		Stockmann HB, IJzermans JN. Prospects for the temporary treatment of acute liver failure. Eur J Gastroenterol Hepatol. 2002 Feb;14(2):195-203. Review. PubMed PMID: 11981346.
		Rogel-Gaillard C, Hayes H, Bourgeaux N, Chardon P. Assignment of two new loci for gamma 1 porcine endogenous retroviruses (gamma 1 PERV) to pig chromosome bands 2q21 and 11q12 by in situ hybridization. Cytogenet Cell Genet. 2001;95(1-2):112-3. PubMed PMID: 11978981.
		Kuddus R, Patzer JF 2nd, Lopez R, Mazariegos GV, Meighen B, Kramer DJ, Rao AS. Clinical and laboratory evaluation of the safety of a bioartificial liver assist device for potential transmission of porcine endogenous retrovirus. Transplantation. 2002 Feb 15;73(3):420-9. PubMed PMID: 11884940.
		Niebert M, Rogel-Gaillard C, Chardon P, Tönjes RR. Characterization of chromosomally assigned replication-competent gamma porcine endogenous retroviruses derived from a large white pig and expression in human cells. J Virol. 2002 Mar;76(6):2714-20. PubMed PMID: 11861838; PubMed Central PMCID: PMC136001.
		Clémenceau B, Jégou D, Martignat L, Saï P. Long-term follow-up failed to detect in vitro transmission of full-length porcine endogenous retroviruses from specific pathogen-free pig islets to human cells. Diabetologia. 2001 Nov;44(11):2044-55. PubMed PMID: 11719837.
		Herring C, Quinn G, Bower R, Parsons N, Logan NA, Brawley A, Elsome K, Whittam A, Fernandez-Suarez XM, Cunningham D, Onions D, Langford G, Scobie L. Mapping full-length porcine endogenous retroviruses in a large white pig. J Virol. 2001 Dec;75(24):12252-65. PubMed PMID: 11711616; PubMed Central PMCID: PMC116122.
		Cunningham DA, Herring C, Fernández-Suárez XM, Whittam AJ, Paradis K, Langford GA. Analysis of patients treated with living pig tissue for evidence of infection by porcine endogenous retroviruses. Trends Cardiovasc Med. 2001 Jul;11(5):190-6. Review. PubMed PMID: 11597830.
		Mang R, Maas J, Chen X, Goudsmit J, van Der Kuyl AC. Identification of a novel type C porcine endogenous retrovirus: evidence that copy number of endogenous retroviruses increases during host inbreeding. J Gen Virol. 2001 Aug;82(Pt 8):1829-34. PubMed PMID: 11457988.
		Specke V, Rubant S, Denner J. Productive infection of human primary cells and cell lines with porcine endogenous retroviruses. Virology. 2001 Jul 5;285(2):177-80. PubMed PMID: 11437652.
		Jin H, Inoshima Y, Wu D, Morooka A, Sentsui H. Expression of porcine endogenous retrovirus in peripheral blood leukocytes from ten different breeds. Transpl Infect Dis. 2000 Mar;2(1):11-4. PubMed PMID: 11429004.
		Bain VG, Montero JL, de La Mata M. Bioartificial liver support. Can J Gastroenterol. 2001 May;15(5):313-8. Review. PubMed PMID: 11381299.
		Krach U, Fischer N, Czauderna F, Tönjes RR. Comparison of replication-competent molecular clones of porcine endogenous retrovirus class A and class B derived from pig and human cells. J Virol. 2001 Jun;75(12):5465-72. PubMed PMID: 11356953; PubMed Central PMCID: PMC114258.
		Switzer WM, Michler RE, Shanmugam V, Matthews A, Hussain AI, Wright A, Sandstrom P, Chapman LE, Weber C, Safley S, Denny RR, Navarro A, Evans V, Norin AJ, Kwiatkowski P, Heneine W. Lack of cross-species transmission of porcine endogenous retrovirus infection to nonhuman primate recipients of porcine cells, tissues, or organs. Transplantation. 2001 Apr 15;71(7):959-65. PubMed PMID: 11349732.
		Tacke SJ, Bodusch K, Berg A, Denner J. Sensitive and specific immunological detection methods for porcine endogenous retroviruses applicable to experimental and clinical xenotransplantation. Xenotransplantation. 2001 May;8(2):125-35. PubMed PMID: 11328583.
		Takefman DM, Wong S, Maudru T, Peden K, Wilson CA. Detection and characterization of porcine endogenous retrovirus in porcine plasma and porcine factor VIII. J Virol. 2001 May;75(10):4551-7. PubMed PMID: 11312325; PubMed Central PMCID: PMC114208.
		Michie C. Xenotransplantation, endogenous pig retroviruses and the precautionary principle. Trends Mol Med. 2001 Feb;7(2):62-3. PubMed PMID: 11286756.
		Templin C, Schröder C, Simon AR, Laaff G, Köhl J, Chikobava M, Lapin B, Winkler ME, Wiebe K, Steinhoff G, Martin U. Long-term monitoring of xenotransplanted baboons: no evidence for pig endogenous retrovirus transmission. Transplant Proc. 2001 Feb-Mar;33(1-2):692. PubMed PMID: 11267021.
		Leventhal JR, Su A, Kaufman DB, Abecassis MI, Stuart FP, Anderson B, Fryer JP. Altered infectivity of porcine endogenous retrovirus by "protective" avian antibodies: implications for pig-to-human xenotransplantation. Transplant Proc. 2001 Feb-Mar;33(1-2):690. PubMed PMID: 11267019.
		Loss M, Arends H, Winkler M, Przemeck M, Steinhoff G, Rensing S, Kaup FJ, Hedrich HJ, Winkler ME, Martin U. Analysis of potential porcine endogenous retrovirus (PERV) transmission in a whole-organ xenotransplantation model without interfering microchimerism. Transpl Int. 2001;14(1):31-7. PubMed PMID: 11263553.
		Specke V, Tacke SJ, Boller K, Schwendemann J, Denner J. Porcine endogenous retroviruses: in vitro host range and attempts to establish small animal models. J Gen Virol. 2001 Apr;82(Pt 4):837-44. PubMed PMID: 11257189.
		Herring C, Cunningham DA, Whittam AJ, Fernández-Suárez XM, Langford GA. Monitoring xenotransplant recipients for infection by PERV. Clin Biochem. 2001 Feb;34(1):23-7. Review. PubMed PMID: 11239511.
		Patience C, Switzer WM, Takeuchi Y, Griffiths DJ, Goward ME, Heneine W, Stoye JP, Weiss RA. Multiple groups of novel retroviral genomes in pigs and related species. J Virol. 2001 Mar;75(6):2771-5. PubMed PMID: 11222700; PubMed Central PMCID: PMC115901.
		Elliott RB, Escobar L, Garkavenko O, Croxson MC, Schroeder BA, McGregor M, Ferguson G, Beckman N, Ferguson S. No evidence of infection with porcine endogenous retrovirus in recipients of encapsulated porcine islet xenografts. Cell Transplant. 2000 Nov-Dec;9(6):895-901. PubMed PMID: 11202575.
		Czauderna F, Fischer N, Boller K, Kurth R, Tönjes RR. Establishment and characterization of molecular clones of porcine endogenous retroviruses replicating on human cells. J Virol. 2000 May;74(9):4028-38. PubMed PMID: 10756014; PubMed Central PMCID: PMC111916.
		Boneva RS, Folks TM, Chapman LE. Infectious disease issues in xenotransplantation. Clin Microbiol Rev. 2001 Jan;14(1):1-14. Review. PubMed PMID: 11148000; PubMed Central PMCID: PMC88959.
		Zimmerer EJ, Carneal J, Robertson JB, Ozturk M, Cardiff S, Luo M. Genome organization and phylogenetic distribution of a novel family of ancient murine endogenous proviruses with evidence for transposition-mediated proliferation. Biochem Genet. 2000 Aug;38(7-8):253-65. PubMed PMID: 11131339.
		Dinsmore JH, Manhart C, Raineri R, Jacoby DB, Moore A. No evidence for infection of human cells with porcine endogenous retrovirus (PERV) after exposure to porcine fetal neuronal cells. Transplantation. 2000 Nov 15;70(9):1382-9. PubMed PMID: 11087157.
		Powell SK, Gates ME, Langford G, Gu ML, Lockey C, Long Z, Otto E. Antiretroviral agents inhibit infection of human cells by porcine endogenous retroviruses. Antimicrob Agents Chemother. 2000 Dec;44(12):3432-3. PubMed PMID: 11083652; PubMed Central PMCID: PMC90217.
		Weiss RA. Ancient and modern retroviruses. Acta Microbiol Immunol Hung. 2000;47(4):403-10. PubMed PMID: 11056760.
		Deng YM, Tuch BE, Rawlinson WD. Transmission of porcine endogenous retroviruses in severe combined immunodeficient mice xenotransplanted with fetal porcine pancreatic cells. Transplantation. 2000 Oct 15;70(7):1010-6. PubMed PMID: 11045635.
		Krach U, Fischer N, Czauderna F, Kurth R, Tönjes RR. Generation and testing of a highly specific anti-serum directed against porcine endogenous retrovirus nucleocapsid. Xenotransplantation. 2000 Aug;7(3):221-9. PubMed PMID: 11021668.
		Prather RS. Cloning. Pigs is pigs. Science. 2000 Sep 15;289(5486):1886-7. PubMed PMID: 11012362.
		van der Laan LJ, Lockey C, Griffeth BC, Frasier FS, Wilson CA, Onions DE, Hering BJ, Long Z, Otto E, Torbett BE, Salomon DR. Infection by porcine endogenous retrovirus after islet xenotransplantation in SCID mice. Nature. 2000 Sep 7;407(6800):90-4. PubMed PMID: 10993079.
		Onions D, Cooper DK, Alexander TJ, Brown C, Claassen E, Foweraker JE, Harris DL, Mahy BW, Minor PD, Osterhaus AD, Pastoret PP, Yamanouchi K. An approach to the control of disease transmission in pig-to-human xenotransplantation. Xenotransplantation. 2000 May;7(2):143-55. Review. PubMed PMID: 10961299.
		Martin U, Winkler ME, Id M, Radeke H, Arseniev L, Takeuchi Y, Simon AR, Patience C, Haverich A, Steinhoff G. Productive infection of primary human endothelial cells by pig endogenous retrovirus (PERV). Xenotransplantation. 2000 May;7(2):138-42. PubMed PMID: 10961298.
		Bösch S, Arnauld C, Jestin A. Study of full-length porcine endogenous retrovirus genomes with envelope gene polymorphism in a specific-pathogen-free Large White swine herd. J Virol. 2000 Sep;74(18):8575-81. PubMed PMID: 10954559; PubMed Central PMCID: PMC116370.
		Martin U, Winkler ME, Id M, Radecke H, Arseniev L, Grotelüschen R, Simon AR, Steinhoff G. Transmission of pig endogenous retrovirus to primary human cells. Transplant Proc. 2000 Aug;32(5):1157. PubMed PMID: 10936399.
		Blusch JH, Patience C, Takeuchi Y, Templin C, Roos C, Von Der Helm K, Steinhoff G, Martin U. Infection of nonhuman primate cells by pig endogenous retrovirus. J Virol. 2000 Aug;74(16):7687-90. PubMed PMID: 10906227; PubMed Central PMCID: PMC112294.
		Blusch JH, Roos C, Nitschko H. A polymerase chain reaction-based protocol for the detection of transmission of pig endogenous retroviruses in pig to human xenotransplantation. Transplantation. 2000 May 27;69(10):2167-72. PubMed PMID: 10852618.
		Fiane AE, Mollnes TE, Degré M. Pig endogenous retrovirus--a threat to clinical xenotransplantation? APMIS. 2000 Apr;108(4):241-50. Review. PubMed PMID: 10843410.
		Seifarth W, Krause U, Hohenadl C, Baust C, Hehlmann R, Leib-Mösch C. Rapid identification of all known retroviral reverse transcriptase sequences with a novel versatile detection assay. AIDS Res Hum Retroviruses. 2000 May 20;16(8):721-9. PubMed PMID: 10826479.
		Blond JL, Lavillette D, Cheynet V, Bouton O, Oriol G, Chapel-Fernandes S, Mandrand B, Mallet F, Cosset FL. An envelope glycoprotein of the human endogenous retrovirus HERV-W is expressed in the human placenta and fuses cells expressing the type D mammalian retrovirus receptor. J Virol. 2000 Apr;74(7):3321-9. PubMed PMID: 10708449; PubMed Central PMCID: PMC111833.
		Tacke SJ, Kurth R, Denner J. Porcine endogenous retroviruses inhibit human immune cell function: risk for xenotransplantation? Virology. 2000 Mar 1;268(1):87-93. PubMed PMID: 10683330.
		Levy MF, Crippin J, Sutton S, Netto G, McCormack J, Curiel T, Goldstein RM, Newman JT, Gonwa TA, Banchereau J, Diamond LE, Byrne G, Logan J, Klintmalm GB. Liver allotransplantation after extracorporeal hepatic support with transgenic (hCD55/hCD59) porcine livers: clinical results and lack of pig-to-human transmission of the porcine endogenous retrovirus. Transplantation. 2000 Jan 27;69(2):272-80.…
		Nyberg SL, Hibbs JR, Hardin JA, Germer JJ, Platt JL, Paya CV, Wiesner RH. Influence of human fulminant hepatic failure sera on endogenous retroviral expression in pig hepatocytes. Liver Transpl. 2000 Jan;6(1):76-84. PubMed PMID: 10648582.
		Clémenceau B, Lalain S, Martignat L, Saï P. Porcine endogenous retroviral mRNAs in pancreas and a panel of tissues from specific pathogen-free pigs. Diabetes Metab. 1999 Dec;25(6):518-25. PubMed PMID: 10633879.
		Wilson CA, Wong S, VanBrocklin M, Federspiel MJ. Extended analysis of the in vitro tropism of porcine endogenous retrovirus. J Virol. 2000 Jan;74(1):49-56. PubMed PMID: 10590090; PubMed Central PMCID: PMC111512.
		Sandrin MS, McKenzie IF. Recent advances in xenotransplantation. Curr Opin Immunol. 1999 Oct;11(5):527-31. PubMed PMID: 10508710.
		Pitkin Z, Mullon C. Evidence of absence of porcine endogenous retrovirus (PERV) infection in patients treated with a bioartificial liver support system. Artif Organs. 1999 Sep;23(9):829-33. PubMed PMID: 10491030.
		von der Helm K, Blusch J. [Risk of infection causes by viruses in xenotransplantation]. Zentralbl Chir. 1999;124(7):600-3. Review. German. PubMed PMID: 10474872.
		Paradis K, Langford G, Long Z, Heneine W, Sandstrom P, Switzer WM, Chapman LE, Lockey C, Onions D, Otto E. Search for cross-species transmission of porcine endogenous retrovirus in patients treated with living pig tissue. The XEN 111 Study Group. Science. 1999 Aug 20;285(5431):1236-41. PubMed PMID: 10455044.
		Switzer WM, Shanmugam V, Chapman L, Heneine W. Polymerase chain reaction assays for the diagnosis of infection with the porcine endogenous retrovirus and the detection of pig cells in human and nonhuman recipients of pig xenografts. Transplantation. 1999 Jul 27;68(2):183-8. PubMed PMID: 10440384.
		Mollnes TE, Fiane AE. Xenotransplantation: how to overcome the complement obstacle? Mol Immunol. 1999 Mar-Apr;36(4-5):269-76. Review. PubMed PMID: 10403480.
		Martin U, Steinhoff G. [Porcine endogenous retroviruses (PERV): in vitro artifact or a big problem for xenotransplantation?]. Dtsch Tierarztl Wochenschr. 1999 Apr;106(4):146-9. German. PubMed PMID: 10354643.
		Niemann H. [Transgenic pigs for xenotransplantation for humans]. Dtsch Tierarztl Wochenschr. 1999 Apr;106(4):141-6. German. PubMed PMID: 10354642.
		Matthews AL, Brown J, Switzer W, Folks TM, Heneine W, Sandstrom PA. Development and validation of a Western immunoblot assay for detection of antibodies to porcine endogenous retrovirus. Transplantation. 1999 Apr 15;67(7):939-43. PubMed PMID: 10221475.
		Martin J, Herniou E, Cook J, O'Neill RW, Tristem M. Interclass transmission and phyletic host tracking in murine leukemia virus-related retroviruses. J Virol. 1999 Mar;73(3):2442-9. PubMed PMID: 9971829; PubMed Central PMCID: PMC104491.
		Stoye JP, Le Tissier P, Takeuchi Y, Patience C, Weiss RA. Endogenous retroviruses: a potential problem for xenotransplantation? Ann N Y Acad Sci. 1998 Dec 30;862:67-74. Review. PubMed PMID: 9928207.
		Martignat L, Saï P, Jestin A. Detection of porcine endogenous retrovirus: possible involvement in pig islet xenotransplantation. Diabetes Metab. 1998 Nov;24(5):434-41. PubMed PMID: 9881242.
		Takeuchi Y, Patience C, Magre S, Weiss RA, Banerjee PT, Le Tissier P, Stoye JP. Host range and interference studies of three classes of pig endogenous retrovirus. J Virol. 1998 Dec;72(12):9986-91. PubMed PMID: 9811736; PubMed Central PMCID: PMC110514.
		Patience C, Patton GS, Takeuchi Y, Weiss RA, McClure MO, Rydberg L, Breimer ME. No evidence of pig DNA or retroviral infection in patients with short-term extracorporeal connection to pig kidneys. Lancet. 1998 Aug 29;352(9129):699-701. PubMed PMID: 9728987.
		Heneine W, Tibell A, Switzer WM, Sandstrom P, Rosales GV, Mathews A, Korsgren O, Chapman LE, Folks TM, Groth CG. No evidence of infection with porcine endogenous retrovirus in recipients of porcine islet-cell xenografts. Lancet. 1998 Aug 29;352(9129):695-9. Erratum in: Lancet 1998 Oct 31;352(9138):1478. PubMed PMID: 9728986.
		Martin U, Kiessig V, Blusch JH, Haverich A, von der Helm K, Herden T, Steinhoff G. Expression of pig endogenous retrovirus by primary porcine endothelial cells and infection of human cells. Lancet. 1998 Aug 29;352(9129):692-4. PubMed PMID: 9728985.
		Martin U, Steinhoff G, Kiessig V, Chikobava M, Anssar M, Morschheuser T, Lapin B, Haverich A. Porcine endogenous retrovirus (PERV) was not transmitted from transplanted porcine endothelial cells to baboons in vivo. Transpl Int. 1998;11(4):247-51. PubMed PMID: 9704386.
		Akiyoshi DE, Denaro M, Zhu H, Greenstein JL, Banerjee P, Fishman JA. Identification of a full-length cDNA for an endogenous retrovirus of miniature swine. J Virol. 1998 May;72(5):4503-7. PubMed PMID: 9557749; PubMed Central PMCID: PMC109691.
		Wilson CA, Wong S, Muller J, Davidson CE, Rose TM, Burd P. Type C retrovirus released from porcine primary peripheral blood mononuclear cells infects human cells. J Virol. 1998 Apr;72(4):3082-7. PubMed PMID: 9525633; PubMed Central PMCID: PMC109758.
		Patience C, Takeuchi Y, Weiss RA. Infection of human cells by an endogenous retrovirus of pigs. Nat Med. 1997 Mar;3(3):282-6. PubMed PMID: 9055854.
		Heneine W, Switzer WM. Highly sensitive and specific polymerase chain reaction assays for detection of baboon and pig cells following xenotransplantation in humans. Transplantation. 1996 Nov 15;62(9):1360-2. PubMed PMID: 8932287.
		Heneine W. Strategies for Diagnosis of Xenotransplant-associated Retroviral Infections. Mol Diagn. 1996 Sep;1(3):255-260. PubMed PMID: 10462568.
		Lerner-Tung MB, Doong SL, Cheng YC, Hsiung GD. Characterization of conditions for the activation of endogenous guinea pig retrovirus in cultured cells by 5-bromo-2'-deoxyuridine. Virus Genes. 1995 Feb;9(3):201-9. PubMed PMID: 7597799.
		Lerner-Tung MB, Crouch JY, Hsiung GD. Demonstration of cytomegalovirus and retrovirus pseudotypes in cultured guinea pig cells. Virology. 1991 Feb;180(2):826-30. PubMed PMID: 1703374.
		Sarma PS, Rowe WP. Mouse immunoglobulin antibodies require complement for neutralization of mouse retroviruses. J Virol. 1983 Mar;45(3):956-60. PubMed PMID: 6300466; PubMed Central PMCID: PMC256501.
		Dahlberg JE, Tronick SR, Aaronson SA. Immunological relationships of an endogenous guinea pig retrovirus with prototype mammalian type B and type D retroviruses. J Virol. 1980 Jan;33(1):522-30. PubMed PMID: 6154150; PubMed Central PMCID: PMC288566.
		Davis AR, Nayak DP, Lofgren J. Induction of endogenous guinea pig retrovirus by 5-bromodeoxyuridine: amplification of virus-specific RNA. J Virol. 1978 Jun;26(3):603-14. PubMed PMID: 566798; PubMed Central PMCID: PMC525886.
		Davis AR, Nayak DP. Expression of endogenous retroviral genes in leukemic guinea pig cells. J Virol. 1977 Aug;23(2):263-71. PubMed PMID: 69723; PubMed Central PMCID: PMC515828.
Potamochoerus porcus	Red river hog	Patience C, Switzer WM, Takeuchi Y, Griffiths DJ, Goward ME, Heneine W, Stoye JP, Weiss RA. Multiple groups of novel retroviral genomes in pigs and relatedspecies. J Virol. 2001 Mar;75(6):2771-5. PubMed PMID: 11222700; PubMed CentralPMCID: PMC115901.
Potamochoerus larvatus	Bush pig	Blomström AL, Ståhl K, Masembe C, Okoth E, Okurut AR, Atmnedi P, Kemp S,Bishop R, Belák S, Berg M. Viral metagenomic analysis of bushpigs (Potamochoerus larvatus) in Uganda identifies novel variants of Porcine parvovirus 4 and Torque teno sus virus 1 and 2. Virol J. 2012 Sep 11;9:192. doi: 10.1186/1743-422X-9-192.PubMed PMID: 22967311; PubMed Central PMCID: PMC3478234.
Aotus trivirgatus	Northern owl monkey	Todaro GJ, Sherr CJ, Sen A, King N, Daniel MD, Fleckenstein B. Endogenous New World primate type C viruses isolated from owl monkey (Aotus trivirgatus) kidney cell line. Proc Natl Acad Sci U S A. 1978 Feb;75(2):1004-8. PubMed PMID: 76312;PubMed Central PMCID: PMC411388.
Lemur catta	Ring-tailed lemur	Rahm N, Yap M, Snoeck J, Zoete V, Muñoz M, Radespiel U, Zimmermann E,Michielin O, Stoye JP, Ciuffi A, Telenti A. Unique spectrum of activity ofprosimian TRIM5alpha against exogenous and endogenous retroviruses. J Virol. 2011May;85(9):4173-83. doi: 10.1128/JVI.00075-11. Epub 2011 Feb 23. PubMed PMID:21345948; PubMed Central PMCID: PMC3126249.
Ailuropoda melanoleuca	Giant panda	Mayer J, Tsangaras K, Heeger F, Avila-Arcos M, Stenglein MD, Chen W, Sun W,Mazzoni CJ, Osterrieder N, Greenwood AD. A novel endogenous betaretrovirus group characterized from polar bears (Ursus maritimus) and giant pandas (Ailuropodamelanoleuca). Virology. 2013 Aug 15;443(1):1-10. doi:10.1016/j.virol.2013.05.008. Epub 2013 May 29. PubMed PMID: 23725819; PubMedCentral PMCID: PMC3700636.
Callithrix jacchus	Marmoset	Tomioka I, Maeda T, Shimada H, Kawai K, Okada Y, Igarashi H, Oiwa R, IwasakiT, Aoki M, Kimura T, Shiozawa S, Shinohara H, Suemizu H, Sasaki E, Okano H.Generating induced pluripotent stem cells from common marmoset (Callithrixjacchus) fetal liver cells using defined factors, including Lin28. Genes Cells.2010 Sep 1;15(9):959-69. doi: 10.1111/j.1365-2443.2010.01437.x. Epub 2010 Jul 28.PubMed PMID: 2…
		Anderssen S, Sjøttem E, Svineng G, Johansen T. Comparative analyses of LTRs ofthe ERV-H family of primate-specific retrovirus-like elements isolated frommarmoset, African green monkey, and man. Virology. 1997 Jul 21;234(1):14-30.PubMed PMID: 9234943.
		Simpson GR, Patience C, Löwer R, Tönjes RR, Moore HD, Weiss RA, Boyd MT.Endogenous D-type (HERV-K) related sequences are packaged into retroviralparticles in the placenta and possess open reading frames for reversetranscriptase. Virology. 1996 Aug 15;222(2):451-6. PubMed PMID: 8806530.
		Mager DL, Freeman JD. HERV-H endogenous retroviruses: presence in the NewWorld branch but amplification in the Old World primate lineage. Virology. 1995Nov 10;213(2):395-404. PubMed PMID: 7491764.
		Steinhuber S, Brack M, Hunsmann G, Schwelberger H, Dierich MP, Vogetseder W.Distribution of human endogenous retrovirus HERV-K genomes in humans anddifferent primates. Hum Genet. 1995 Aug;96(2):188-92. PubMed PMID: 7635468.
		Wilkinson DA, Goodchild NL, Saxton TM, Wood S, Mager DL. Evidence for afunctional subclass of the RTVL-H family of human endogenous retrovirus-likesequences. J Virol. 1993 Jun;67(6):2981-9. PubMed PMID: 8388483; PubMed CentralPMCID: PMC237634.
Ovis aries	Sheep	Caporale M, Martineau H, De las Heras M, Murgia C, Huang R, Centorame P, Di Francesco G, Di Gialleonardo L, Spencer TE, Griffiths DJ, Palmarini M. Host species barriers to Jaagsiekte sheep retrovirus replication and carcinogenesis. J Virol. 2013 Oct;87(19):10752-62. doi: 10.1128/JVI.01472-13. Epub 2013 Jul 31. PubMed PMID: 23903827; PubMed Central PMCID: PMC3807380.
		Nakaya Y, Koshi K, Nakagawa S, Hashizume K, Miyazawa T. Fematrin-1 is involved in fetomaternal cell-to-cell fusion in Bovinae placenta and has contributed to diversity of ruminant placentation. J Virol. 2013 Oct;87(19):10563-72. doi: 10.1128/JVI.01398-13. Epub 2013 Jul 17. PubMed PMID: 23864631; PubMed Central PMCID: PMC3807419.
		Hayward JA, Tachedjian M, Cui J, Field H, Holmes EC, Wang LF, Tachedjian G. Identification of diverse full-length endogenous betaretroviruses in megabats and microbats. Retrovirology. 2013 Mar 27;10:35. doi: 10.1186/1742-4690-10-35. PubMed PMID: 23537098; PubMed Central PMCID: PMC3621094.
		Cornelis G, Heidmann O, Degrelle SA, Vernochet C, Lavialle C, Letzelter C, Bernard-Stoecklin S, Hassanin A, Mulot B, Guillomot M, Hue I, Heidmann T, Dupressoir A. Captured retroviral envelope syncytin gene associated with the unique placental structure of higher ruminants. Proc Natl Acad Sci U S A. 2013 Feb 26;110(9):E828-37. doi: 10.1073/pnas.1215787110. Epub 2013 Feb 11. PubMed PMID: 23401540; …
		Henzy JE, Coffin JM. Betaretroviral envelope subunits are noncovalently associated and restricted to the mammalian class. J Virol. 2013 Feb;87(4):1937-46. doi: 10.1128/JVI.01442-12. Epub 2012 Dec 5. PubMed PMID: 23221553; PubMed Central PMCID: PMC3571459.
		Spencer TE, Palmarini M. Application of next generation sequencing in mammalian embryogenomics: lessons learned from endogenous betaretroviruses of sheep. Anim Reprod Sci. 2012 Sep;134(1-2):95-103. doi: 10.1016/j.anireprosci.2012.08.016. Epub 2012 Aug 11. Review. PubMed PMID: 22951118; PubMed Central PMCID: PMC3471992.
		Viginier B, Dolmazon C, Lantier I, Lantier F, Archer F, Leroux C, Terzian C. Copy number variation and differential expression of a protective endogenous retrovirus in sheep. PLoS One. 2012;7(7):e41965. doi: 10.1371/journal.pone.0041965. Epub 2012 Jul 24. PubMed PMID: 22911867; PubMed Central PMCID: PMC3404005.
		Hull S, Lim J, Hamil A, Nitta T, Fan H. Analysis of jaagsiekte sheep retrovirus (JSRV) envelope protein domains in transformation. Virus Genes. 2012 Dec;45(3):508-17. doi: 10.1007/s11262-012-0793-y. Epub 2012 Aug 4. PubMed PMID: 22864547; PubMed Central PMCID: PMC3775717.
		Qi JW, Wu XL, Liu SY, Cao GF. Expression of endogenous beta retroviruses and Hyal-2 mRNA in immune organs of fetuses and lambs. Virol Sin. 2012 Apr;27(2):83-92. doi: 10.1007/s12250-012-3222-4. Epub 2012 Apr 11. PubMed PMID: 22491999.
		Spencer TE, Palmarini M. Endogenous retroviruses of sheep: a model system for understanding physiological adaptation to an evolving ruminant genome. J Reprod Dev. 2012;58(1):33-7. Review. PubMed PMID: 22450282.
		Elleder D, Kim O, Padhi A, Bankert JG, Simeonov I, Schuster SC, Wittekindt NE, Motameny S, Poss M. Polymorphic integrations of an endogenous gammaretrovirus in the mule deer genome. J Virol. 2012 Mar;86(5):2787-96. doi: 10.1128/JVI.06859-11. Epub 2011 Dec 21. PubMed PMID: 22190723; PubMed Central PMCID: PMC3302240.
		Liu J, Balehosur D, Murray B, Kelly JM, Sumer H, Verma PJ. Generation and characterization of reprogrammed sheep induced pluripotent stem cells. Theriogenology. 2012 Jan 15;77(2):338-46.e1. doi: 10.1016/j.theriogenology.2011.08.006. Epub 2011 Sep 29. PubMed PMID: 21958637.
		Maeda N, Inoshima Y, Oouchi S, Uede T. Surveillance of Jaagsiekte sheep retrovirus in sheep in Hokkaido, the northern island of Japan. J Vet Med Sci. 2011 Nov;73(11):1493-5. Epub 2011 Jun 28. PubMed PMID: 21712639.
		Armezzani A, Arnaud F, Caporale M, di Meo G, Iannuzzi L, Murgia C, Palmarini M. The signal peptide of a recently integrated endogenous sheep betaretrovirus envelope plays a major role in eluding gag-mediated late restriction. J Virol. 2011 Jul;85(14):7118-28. doi: 10.1128/JVI.00407-11. Epub 2011 May 18. PubMed PMID: 21593182; PubMed Central PMCID: PMC3126591.
		Koshi K, Ushizawa K, Kizaki K, Takahashi T, Hashizume K. Expression of endogenous retrovirus-like transcripts in bovine trophoblastic cells. Placenta. 2011 Jul;32(7):493-9. doi: 10.1016/j.placenta.2011.04.002. Epub 2011 May 14. PubMed PMID: 21571366.
		Hopwood P, Wallace WA, Cousens C, Dewar P, Muldoon M, Norval M, Griffiths DJ. Absence of markers of betaretrovirus infection in human pulmonary adenocarcinoma. Hum Pathol. 2010 Nov;41(11):1631-40. doi: 10.1016/j.humpath.2010.05.013. Epub 2010 Sep 9. PubMed PMID: 20825971.
		Black SG, Arnaud F, Burghardt RC, Satterfield MC, Fleming JA, Long CR, Hanna C, Murphy L, Biek R, Palmarini M, Spencer TE. Viral particles of endogenous betaretroviruses are released in the sheep uterus and infect the conceptus trophectoderm in a transspecies embryo transfer model. J Virol. 2010 Sep;84(18):9078-85. doi: 10.1128/JVI.00950-10. Epub 2010 Jul 7. PubMed PMID: 20610723; PubMed Central …
		Black SG, Arnaud F, Palmarini M, Spencer TE. Endogenous retroviruses in trophoblast differentiation and placental development. Am J Reprod Immunol. 2010 Oct;64(4):255-64. doi: 10.1111/j.1600-0897.2010.00860.x. Epub 2010 May 26. Review. PubMed PMID: 20528833; PubMed Central PMCID: PMC4198168.
		Miyazawa T. [Receptors for animal retroviruses]. Uirusu. 2009 Dec;59(2):223-42. Review. Japanese. PubMed PMID: 20218331.
		Arnaud F, Black SG, Murphy L, Griffiths DJ, Neil SJ, Spencer TE, Palmarini M. Interplay between ovine bone marrow stromal cell antigen 2/tetherin and endogenous retroviruses. J Virol. 2010 May;84(9):4415-25. doi: 10.1128/JVI.00029-10. Epub 2010 Feb 24. PubMed PMID: 20181686; PubMed Central PMCID: PMC2863748.
		Spencer TE, Black SG, Arnaud F, Palmarini M. Endogenous retroviruses of sheep: a model system for understanding physiological adaptation to an evolving ruminant genome. Soc Reprod Fertil Suppl. 2010;67:95-104. Review. PubMed PMID: 21755665.
		Varela M, Spencer TE, Palmarini M, Arnaud F. Friendly viruses: the special relationship between endogenous retroviruses and their host. Ann N Y Acad Sci. 2009 Oct;1178:157-72. doi: 10.1111/j.1749-6632.2009.05002.x. PubMed PMID: 19845636; PubMed Central PMCID: PMC4199234.
		Hofacre A, Nitta T, Fan H. Jaagsiekte sheep retrovirus encodes a regulatory factor, Rej, required for synthesis of Gag protein. J Virol. 2009 Dec;83(23):12483-98. doi: 10.1128/JVI.01747-08. Epub 2009 Sep 23. PubMed PMID: 19776124; PubMed Central PMCID: PMC2786725.
		Luo JR, Liu XH, Yu QY, Zhang SQ, Zhou JH, Ma XE. [A specific PCR assay and a nested PCR assay for the screening of ovine pulmonary adenomatosis]. Bing Du Xue Bao. 2009 Mar;25(2):125-30. Chinese. PubMed PMID: 19678567.
		Chessa B, Pereira F, Arnaud F, Amorim A, Goyache F, Mainland I, Kao RR, Pemberton JM, Beraldi D, Stear MJ, Alberti A, Pittau M, Iannuzzi L, Banabazi MH, Kazwala RR, Zhang YP, Arranz JJ, Ali BA, Wang Z, Uzun M, Dione MM, Olsaker I, Holm LE, Saarma U, Ahmad S, Marzanov N, Eythorsdottir E, Holland MJ, Ajmone-Marsan P, Bruford MW, Kantanen J, Spencer TE, Palmarini M. Revealing the history of sheep do…
		Mortuza GB, Goldstone DC, Pashley C, Haire LF, Palmarini M, Taylor WR, Stoye JP, Taylor IA. Structure of the capsid amino-terminal domain from the betaretrovirus, Jaagsiekte sheep retrovirus. J Mol Biol. 2009 Mar 6;386(4):1179-92. doi: 10.1016/j.jmb.2008.10.066. Epub 2008 Nov 5. PubMed PMID: 19007792.
		Arnaud F, Varela M, Spencer TE, Palmarini M. Coevolution of endogenous betaretroviruses of sheep and their host. Cell Mol Life Sci. 2008 Nov;65(21):3422-32. doi: 10.1007/s00018-008-8500-9. Review. PubMed PMID: 18818869; PubMed Central PMCID: PMC4207369.
		Gu C, Wei X, Wang Y, Chen Y, Liu J, Wang H, Sun G, Yi D. No infection with porcine endogenous retrovirus in recipients of acellular porcine aortic valves: a two-year study. Xenotransplantation. 2008 Mar-Apr;15(2):121-8. doi: 10.1111/j.1399-3089.2008.00447.x. PubMed PMID: 18447885.
		Xiao R, Kim J, Choi H, Park K, Lee H, Park C. Characterization of the bovine endogenous retrovirus beta3 genome. Mol Cells. 2008 Feb 29;25(1):142-7. PubMed PMID: 18319627.
		Arnaud F, Caporale M, Varela M, Biek R, Chessa B, Alberti A, Golder M, Mura M, Zhang YP, Yu L, Pereira F, Demartini JC, Leymaster K, Spencer TE, Palmarini M. A paradigm for virus-host coevolution: sequential counter-adaptations between endogenous and exogenous retroviruses. PLoS Pathog. 2007 Nov;3(11):e170. PubMed PMID: 17997604; PubMed Central PMCID: PMC2065879.
		Xiao R, Park K, Lee H, Kim J, Park C. Identification and classification of endogenous retroviruses in cattle. J Virol. 2008 Jan;82(1):582-7. Epub 2007 Oct 24. PubMed PMID: 17959664; PubMed Central PMCID: PMC2224374.
		De Las Heras M, Murcia P, Ortín A, Azúa J, Borderías L, Alvarez R, Jiménez-Más JA, Marchetti A, Palmarini M. Jaagsiekte sheep retrovirus is not detected in human lung adenocarcinomas expressing antigens related to the Gag polyprotein of betaretroviruses. Cancer Lett. 2007 Dec 8;258(1):22-30. Epub 2007 Sep 24. PubMed PMID: 17889995.
		Arnaud F, Murcia PR, Palmarini M. Mechanisms of late restriction induced by an endogenous retrovirus. J Virol. 2007 Oct;81(20):11441-51. Epub 2007 Aug 15. PubMed PMID: 17699582; PubMed Central PMCID: PMC2045543.
		Morozov VA, Morozov AV, Lagaye S. Endogenous JSRV-like proviruses in domestic cattle: analysis of sequences and transcripts. Virology. 2007 Oct 10;367(1):59-70. Epub 2007 Jun 13. PubMed PMID: 17570457.
		Spencer TE, Johnson GA, Bazer FW, Burghardt RC, Palmarini M. Pregnancy recognition and conceptus implantation in domestic ruminants: roles of progesterone, interferons and endogenous retroviruses. Reprod Fertil Dev. 2007;19(1):65-78. Review. PubMed PMID: 17389136.
		McGee-Estrada K, Fan H. Comparison of LTR enhancer elements in sheep beta retroviruses: insights into the basis for tissue-specific expression. Virus Genes. 2007 Oct;35(2):303-12. Epub 2007 Feb 1. PubMed PMID: 17268841.
		Popp SK, Mann DA, Milburn PJ, Gibbs AJ, McCullagh PJ, Wilson JD, Tönjes RR, Simeonovic CJ. Transient transmission of porcine endogenous retrovirus to fetal lambs after pig islet tissue xenotransplantation. Immunol Cell Biol. 2007 Apr-May;85(3):238-48. Epub 2007 Jan 16. PubMed PMID: 17228325.
		Murcia PR, Arnaud F, Palmarini M. The transdominant endogenous retrovirus enJS56A1 associates with and blocks intracellular trafficking of Jaagsiekte sheep retrovirus Gag. J Virol. 2007 Feb;81(4):1762-72. Epub 2006 Nov 29. PubMed PMID: 17135320; PubMed Central PMCID: PMC1797599.
		Dunlap KA, Palmarini M, Varela M, Burghardt RC, Hayashi K, Farmer JL, Spencer TE. Endogenous retroviruses regulate periimplantation placental growth and differentiation. Proc Natl Acad Sci U S A. 2006 Sep 26;103(39):14390-5. Epub 2006 Sep 15. PubMed PMID: 16980413; PubMed Central PMCID: PMC1599973.
		Dunlap KA, Palmarini M, Spencer TE. Ovine endogenous betaretroviruses (enJSRVs) and placental morphogenesis. Placenta. 2006 Apr;27 Suppl A:S135-40. Epub 2006 Mar 13. Review. PubMed PMID: 16533524.
		Varela M, Chow YH, Sturkie C, Murcia P, Palmarini M. Association of RON tyrosine kinase with the Jaagsiekte sheep retrovirus envelope glycoprotein. Virology. 2006 Jul 5;350(2):347-57. Epub 2006 Feb 28. PubMed PMID: 16500691.
		Wootton SK, Halbert CL, Miller AD. Sheep retrovirus structural protein induces lung tumours. Nature. 2005 Apr 14;434(7035):904-7. PubMed PMID: 15829964; PubMed Central PMCID: PMC1401489.
		Dunlap KA, Palmarini M, Adelson DL, Spencer TE. Sheep endogenous betaretroviruses (enJSRVs) and the hyaluronidase 2 (HYAL2) receptor in the ovine uterus and conceptus. Biol Reprod. 2005 Aug;73(2):271-9. Epub 2005 Mar 23. PubMed PMID: 15788753.
		Ledoux JM. Effects on the serotoninergic system in sub-acute transmissible spongiform encephalopathies: current data, hypotheses, suggestions for experimentation. Med Hypotheses. 2005;64(5):910-8. PubMed PMID: 15780484.
		Hallwirth C, Maeda N, York D, Fan H. Variable regions 1 and 2 (VR1 and VR2) in JSRV gag are not responsible for the endogenous JSRV particle release defect. Virus Genes. 2005 Jan;30(1):59-68. PubMed PMID: 15744563.
		Morozov VA, Lagaye S, Löwer J, Löwer R. Detection and characterization of betaretroviral sequences, related to sheep Jaagsiekte virus, in Africans from Nigeria and Cameroon. Virology. 2004 Oct 1;327(2):162-8. PubMed PMID: 15351203.
		Mura M, Murcia P, Caporale M, Spencer TE, Nagashima K, Rein A, Palmarini M. Late viral interference induced by transdominant Gag of an endogenous retrovirus. Proc Natl Acad Sci U S A. 2004 Jul 27;101(30):11117-22. Epub 2004 Jul 19. PubMed PMID: 15263098; PubMed Central PMCID: PMC503749.
		Kallenbach K, Leyh RG, Lefik E, Walles T, Wilhelmi M, Cebotari S, Schmiedl A, Haverich A, Mertsching H. Guided tissue regeneration: porcine matrix does not transmit PERV. Biomaterials. 2004 Aug;25(17):3613-20. PubMed PMID: 15020135.
		Palmarini M, Mura M, Spencer TE. Endogenous betaretroviruses of sheep: teaching new lessons in retroviral interference and adaptation. J Gen Virol. 2004 Jan;85(Pt 1):1-13. Review. PubMed PMID: 14718613.
		Leyh RG, Wilhelmi M, Walles T, Kallenbach K, Rebe P, Oberbeck A, Herden T, Haverich A, Mertsching H. Acellularized porcine heart valve scaffolds for heart valve tissue engineering and the risk of cross-species transmission of porcine endogenous retrovirus. J Thorac Cardiovasc Surg. 2003 Oct;126(4):1000-4. PubMed PMID: 14566238.
		Klymiuk N, Müller M, Brem G, Aigner B. Characterization of endogenous retroviruses in sheep. J Virol. 2003 Oct;77(20):11268-73. PubMed PMID: 14512574; PubMed Central PMCID: PMC224999.
		Walles T, Lichtenberg A, Puschmann C, Leyh R, Wilhelmi M, Kallenbach K, Haverich A, Mertsching H. In vivo model for cross-species porcine endogenous retrovirus transmission using tissue engineered pulmonary arteries. Eur J Cardiothorac Surg. 2003 Sep;24(3):358-63. PubMed PMID: 12965305.
		Lynch C, Tristem M. A co-opted gypsy-type LTR-retrotransposon is conserved in the genomes of humans, sheep, mice, and rats. Curr Biol. 2003 Sep 2;13(17):1518-23. PubMed PMID: 12956954.
		Carlson J, Lyon M, Bishop J, Vaiman A, Cribiu E, Mornex JF, Brown S, Knudson D, DeMartini J, Leroux C. Chromosomal distribution of endogenous Jaagsiekte sheep retrovirus proviral sequences in the sheep genome. J Virol. 2003 Sep;77(17):9662-8. PubMed PMID: 12915578; PubMed Central PMCID: PMC187430.
		De las Heras M, Ortín A, Cousens C, Minguijón E, Sharp JM. Enzootic nasal adenocarcinoma of sheep and goats. Curr Top Microbiol Immunol. 2003;275:201-23. Review. PubMed PMID: 12596900.
		DeMartini JC, Carlson JO, Leroux C, Spencer T, Palmarini M. Endogenous retroviruses related to jaagsiekte sheep retrovirus. Curr Top Microbiol Immunol. 2003;275:117-37. Review. PubMed PMID: 12596897.
		Sharp JM, DeMartini JC. Natural history of JSRV in sheep. Curr Top Microbiol Immunol. 2003;275:55-79. Review. PubMed PMID: 12596895.
		York DF, Querat G. A history of ovine pulmonary adenocarcinoma (jaagsiekte) and experiments leading to the deduction of the JSRV nucleotide sequence. Curr Top Microbiol Immunol. 2003;275:1-23. PubMed PMID: 12596893.
		Spencer TE, Mura M, Gray CA, Griebel PJ, Palmarini M. Receptor usage and fetal expression of ovine endogenous betaretroviruses: implications for coevolution of endogenous and exogenous retroviruses. J Virol. 2003 Jan;77(1):749-53. PubMed PMID: 12477881; PubMed Central PMCID: PMC140614.
		Sanna E, Sanna MP, Loddo C, Sanna L, Mura M, Cadelano T, Leoni A. Endogenous jaagsiekte sheep retrovirus RNA is expressed by different cell types in ovine foetus and placenta. Eur J Histochem. 2002;46(3):273-80. PubMed PMID: 12472123.
		Spencer TE, Bazer FW. Biology of progesterone action during pregnancy recognition and maintenance of pregnancy. Front Biosci. 2002 Sep 1;7:d1879-98. Review. PubMed PMID: 12161340.
		Palmarini M, Gray CA, Carpenter K, Fan H, Bazer FW, Spencer TE. Expression of endogenous betaretroviruses in the ovine uterus: effects of neonatal age, estrous cycle, pregnancy, and progesterone. J Virol. 2001 Dec;75(23):11319-27. PubMed PMID: 11689612; PubMed Central PMCID: PMC114717.
		Yousem SA, Finkelstein SD, Swalsky PA, Bakker A, Ohori NP. Absence of jaagsiekte sheep retrovirus DNA and RNA in bronchioloalveolar and conventional human pulmonary adenocarcinoma by PCR and RT-PCR analysis. Hum Pathol. 2001 Oct;32(10):1039-42. PubMed PMID: 11679936.
		Palmarini M, Maeda N, Murgia C, De-Fraja C, Hofacre A, Fan H. A phosphatidylinositol 3-kinase docking site in the cytoplasmic tail of the Jaagsiekte sheep retrovirus transmembrane protein is essential for envelope-induced transformation of NIH 3T3 cells. J Virol. 2001 Nov;75(22):11002-9. PubMed PMID: 11602740; PubMed Central PMCID: PMC114680.
		Prather RS. Cloning. Pigs is pigs. Science. 2000 Sep 15;289(5486):1886-7. PubMed PMID: 11012362.
		De las Heras M, Barsky SH, Hasleton P, Wagner M, Larson E, Egan J, Ortin A, Gimenez-Mas JA, Palmarini M, Sharp JM. Evidence for a protein related immunologically to the jaagsiekte sheep retrovirus in some human lung tumours. Eur Respir J. 2000 Aug;16(2):330-2. PubMed PMID: 10968511.
		Palmarini M, Hallwirth C, York D, Murgia C, de Oliveira T, Spencer T, Fan H. Molecular cloning and functional analysis of three type D endogenous retroviruses of sheep reveal a different cell tropism from that of the highly related exogenous jaagsiekte sheep retrovirus. J Virol. 2000 Sep;74(17):8065-76. PubMed PMID: 10933716; PubMed Central PMCID: PMC112339.
		Rosati S, Pittau M, Alberti A, Pozzi S, York DF, Sharp JM, Palmarini M. An accessory open reading frame (orf-x) of jaagsiekte sheep retrovirus is conserved between different virus isolates. Virus Res. 2000 Jan;66(1):109-16. PubMed PMID: 10653922.
		Palmarini M, Sharp JM, Lee C, Fan H. In vitro infection of ovine cell lines by Jaagsiekte sheep retrovirus. J Virol. 1999 Dec;73(12):10070-8. PubMed PMID: 10559321; PubMed Central PMCID: PMC113058.
		Spencer TE, Stagg AG, Joyce MM, Jenster G, Wood CG, Bazer FW, Wiley AA, Bartol FF. Discovery and characterization of endometrial epithelial messenger ribonucleic acids using the ovine uterine gland knockout model. Endocrinology. 1999 Sep;140(9):4070-80. PubMed PMID: 10465278.
		Bai J, Bishop JV, Carlson JO, DeMartini JC. Sequence comparison of JSRV with endogenous proviruses: envelope genotypes and a novel ORF with similarity to a G-protein-coupled receptor. Virology. 1999 Jun 5;258(2):333-43. PubMed PMID: 10366570.
		Ristevski S, Purcell DF, Marshall J, Campagna D, Nouri S, Fenton SP, McPhee DA, Kannourakis G. Novel endogenous type D retroviral particles expressed at high levels in a SCID mouse thymic lymphoma. J Virol. 1999 Jun;73(6):4662-9. PubMed PMID: 10233925; PubMed Central PMCID: PMC112507.
		Cousens C, Minguijon E, Dalziel RG, Ortin A, Garcia M, Park J, Gonzalez L, Sharp JM, de las Heras M. Complete sequence of enzootic nasal tumor virus, a retrovirus associated with transmissible intranasal tumors of sheep. J Virol. 1999 May;73(5):3986-93. PubMed PMID: 10196294; PubMed Central PMCID: PMC104177.
		Ceneviva GD, Tzeng E, Hoyt DG, Yee E, Gallagher A, Engelhardt JF, Kim YM, Billiar TR, Watkins SA, Pitt BR. Nitric oxide inhibits lipopolysaccharide-induced apoptosis in pulmonary artery endothelial cells. Am J Physiol. 1998 Oct;275(4 Pt 1):L717-28. PubMed PMID: 9755104.
		Palmarini M, Holland MJ, Cousens C, Dalziel RG, Sharp JM. Jaagsiekte retrovirus establishes a disseminated infection of the lymphoid tissues of sheep affected by pulmonary adenomatosis. J Gen Virol. 1996 Dec;77 ( Pt 12):2991-8. PubMed PMID: 9000089.
		Hecht SJ, Sharp JM, Demartini JC. Retroviral aetiopathogenesis of ovine pulmonary carcinoma: a critical appraisal. Br Vet J. 1996 Jul;152(4):395-409. Review. PubMed PMID: 8791848.
		Bai J, Zhu RY, Stedman K, Cousens C, Carlson J, Sharp JM, DeMartini JC. Unique long terminal repeat U3 sequences distinguish exogenous jaagsiekte sheep retroviruses associated with ovine pulmonary carcinoma from endogenous loci in the sheep genome. J Virol. 1996 May;70(5):3159-68. PubMed PMID: 8627796; PubMed Central PMCID: PMC190179.
		Modlin CS, Muruve NA, Stanko D, Caulfield MJ, Fairchild RL. Recipient polyclonal B cell activation and immunoglobulin production induced by priming with a retroviral superantigen. Cell Immunol. 1996 May 1;169(2):252-63. PubMed PMID: 8620553.
		Hecht SJ, Stedman KE, Carlson JO, DeMartini JC. Distribution of endogenous type B and type D sheep retrovirus sequences in ungulates and other mammals. Proc Natl Acad Sci U S A. 1996 Apr 16;93(8):3297-302. PubMed PMID: 8622932; PubMed Central PMCID: PMC39601.
		Palmarini M, Cousens C, Dalziel RG, Bai J, Stedman K, DeMartini JC, Sharp JM. The exogenous form of Jaagsiekte retrovirus is specifically associated with a contagious lung cancer of sheep. J Virol. 1996 Mar;70(3):1618-23. PubMed PMID: 8627682; PubMed Central PMCID: PMC189985.
		Hecht SJ, Carlson JO, DeMartin JC. Analysis of a type D retroviral capsid gene expressed in ovine pulmonary carcinoma and present in both affected and unaffected sheep genomes. Virology. 1994 Jul;202(1):480-4. PubMed PMID: 8009860.
		York DF, Vigne R, Verwoerd DW, Querat G. Nucleotide sequence of the jaagsiekte retrovirus, an exogenous and endogenous type D and B retrovirus of sheep and goats. J Virol. 1992 Aug;66(8):4930-9. PubMed PMID: 1629959; PubMed Central PMCID: PMC241337.
		York DF, Vigne R, Verwoerd DW, Querat G. Isolation, identification, and partial cDNA cloning of genomic RNA of jaagsiekte retrovirus, the etiological agent of sheep pulmonary adenomatosis. J Virol. 1991 Sep;65(9):5061-7. PubMed PMID: 1651422; PubMed Central PMCID: PMC248970.
		Eglitis MA, Kantoff PW, McLachlin JR, Gillio A, Flake AW, Bordignon C, Moen RC, Karson EM, Zwiebel JA, Kohn DB, et al. Gene therapy: efforts at developing large animal models for autologous bone marrow transplant and gene transfer with retroviral vectors. Ciba Found Symp. 1987;130:229-46. PubMed PMID: 3327664.
		Závada J, Závadová Z, Russ G. Rescue of presumptive viral information from human cells by a helper oncovirus. J Gen Virol. 1986 Aug;67 ( Pt 8):1561-9. PubMed PMID: 3016151.
		Barban V, Quérat G, Sauze N, Filippi P, Vigne R, Russo P, Vitu C. Lentiviruses are naturally resident in a latent form in long-term ovine fibroblast cultures. J Virol. 1984 Nov;52(2):680-2. PubMed PMID: 6092690; PubMed Central PMCID: PMC254573.
		Markenson JA, Snyder HW Jr. Reactivity of antisera to endogenous primate retrovirus with a human T cell membrane protein: recognition of a nonviral glycoprotein by antibodies directed only against carbohydrate components. J Immunol. 1984 Feb;132(2):772-9. PubMed PMID: 6197475.
		Verwoerd DW, Payne AL, York DF, Myer MS. Isolation and preliminary characterization of the jaagsiekte retrovirus (JSRV). Onderstepoort J Vet Res. 1983 Dec;50(4):309-16. PubMed PMID: 6676694.
		Hoffman PM, Pitts OM, Rohwer RG, Gajdusek DC, Ruscetti SK. Retrovirus antigens in brains of mice with scrapie- and murine leukemia virus-induced spongiform encephalopathy. Infect Immun. 1982 Oct;38(1):396-8. PubMed PMID: 6292099; PubMed Central PMCID: PMC347747.
		Halpern MS, Mason WS, Ewert DL, Deery DT, England JM. Expression of endogenous retroviral envelope antigen in Ig(+) B cells of immunized 15I5 X 71 chickens. J Immunol. 1981 Mar;126(3):1198-202. PubMed PMID: 7007501.
		Rice NR, Simek S, Ryder OA, Coggins L. Detection of proviral DNA in horse cells infected with equine infectious anemia virus. J Virol. 1978 Jun;26(3):577-83. PubMed PMID: 209211; PubMed Central PMCID: PMC525883.
Macaca radiata	Bonnet macaque	Switzer WM, Michler RE, Shanmugam V, Matthews A, Hussain AI, Wright A,Sandstrom P, Chapman LE, Weber C, Safley S, Denny RR, Navarro A, Evans V, NorinAJ, Kwiatkowski P, Heneine W. Lack of cross-species transmission of porcineendogenous retrovirus infection to nonhuman primate recipients of porcine cells, tissues, or organs. Transplantation. 2001 Apr 15;71(7):959-65. PubMed PMID:11349732.
		Fine DL, Arthur LO. Expression of natural antibodies against endogenous andhorizontally transmitted macaque retroviruses in captive primates. Virology. 1981Jul 15;112(1):49-61. PubMed PMID: 6166123.
Saimiri sciureus	Squirrel monkey	Huh JW, Kim TH, Yi JM, Park ES, Kim WY, Sin HS, Kim DS, Min DS, Kim SS, Kim CB, Hyun BH, Kang SK, Jung JS, Lee WH, Takenaka O, Kim HS. Molecular evolution of the periphilin gene in relation to human endogenous retrovirus m element. J Mol Evol. 2006 Jun;62(6):730-7. Epub 2006 Apr 11. PubMed PMID: 16612547.
		Yi JM, Kim TH, Huh JI, Nakamura S, Takenaka O, Lee WH, Hyun BH, Kim HS. Endogenous retrovirus HC2 pol fragments in the squirrel monkey: expression, evolution, and phylogeny. Arch Virol. 2003 Nov;148(11):2257-65. PubMed PMID: 14579182.
		Chiu CN, Mitra R, Chiu IM. Exchange of genetic sequences of long terminal repeat and the env gene by a promiscuous primate type D retrovirus. Virus Res. 2003 Oct;96(1-2):107-11. PubMed PMID: 12951270.
		Lovatt A, Black J, Galbraith D, Doherty I, Moran MW, Shepherd AJ, Griffen A, Bailey A, Wilson N, Smith KT. High throughput detection of retrovirus-associated reverse transcriptase using an improved fluorescent product enhanced reverse transcriptase assay and its comparison to conventional detection methods. J Virol Methods. 1999 Oct;82(2):185-200. PubMed PMID: 10894635.
		Kim HS, Wadekar RV, Takenaka O, Hyun BH, Crow TJ. Phylogenetic analysis of HERV-K LTR-like elements in primates: presence in some new world monkeys and evidence of recent parallel evolution in these species and in homo sapiens. Arch Virol. 1999;144(10):2035-40. PubMed PMID: 10550675.
		Kjellman C, Sjögren HO, Widegren B. HERV-F, a new group of human endogenous retrovirus sequences. J Gen Virol. 1999 Sep;80 ( Pt 9):2383-92. PubMed PMID: 10501491.
		Widegren B, Kjellman C, Aminoff S, Sahlford LG, Sjögren HO. The structure and phylogeny of a new family of human endogenous retroviruses. J Gen Virol. 1996 Aug;77 ( Pt 8):1631-41. PubMed PMID: 8760409.
		Ikeda S, Watanabe T, Oda T. Identification of two human sequence-specific DNA-binding proteins which interact with the direct repeats in the squirrel monkey retrovirus long terminal repeat. Virology. 1995 Aug 1;211(1):316-9. PubMed PMID: 7645228.
		Sommerfelt MA, Williams BP, McKnight A, Goodfellow PN, Weiss RA. Localization of the receptor gene for type D simian retroviruses on human chromosome 19. J Virol. 1990 Dec;64(12):6214-20. PubMed PMID: 2173788; PubMed Central PMCID: PMC248796.
		Ono M. Molecular biology of type A endogenous retrovirus. Kitasato Arch Exp Med. 1990 Sep;63(2-3):77-90. Review. PubMed PMID: 1710682.
		Barker CS, Pickel J, Tainsky M, Hunter E. Molecular cloning of the Mason-Pfizer monkey virus genome: biological characterization of genome length clones and molecular comparisons to other retroviruses. Virology. 1986 Sep;153(2):201-14. PubMed PMID: 3016990.
		Callahan R, Chiu IM, Wong JF, Tronick SR, Roe BA, Aaronson SA, Schlom J. A new class of endogenous human retroviral genomes. Science. 1985 Jun 7;228(4704):1208-11. PubMed PMID: 2408338.
		Chiu IM, Andersen PR, Aaronson SA, Tronick SR. Molecular cloning of the unintegrated squirrel monkey retrovirus genome: organization and distribution of related sequences in primate DNAs. J Virol. 1983 Sep;47(3):434-41. PubMed PMID: 6312076; PubMed Central PMCID: PMC255284.
		Cohen M, Rice N, Stephens R, O'Connell C. DNA sequence relationship of the baboon endogenous virus genome to the genomes of other type C and type D retroviruses. J Virol. 1982 Mar;41(3):801-12. PubMed PMID: 6284972; PubMed Central PMCID: PMC256817.
		Dahlberg JE, Tronick SR, Aaronson SA. Immunological relationships of an endogenous guinea pig retrovirus with prototype mammalian type B and type D retroviruses. J Virol. 1980 Jan;33(1):522-30. PubMed PMID: 6154150; PubMed Central PMCID: PMC288566.
		Devare SG, Stephenson JR. Primate retroviruses: intracistronic mapping of type D viral gag gene by use of nonconditional replication mutants. J Virol. 1979 Mar;29(3):1035-43. PubMed PMID: 448794; PubMed Central PMCID: PMC353264.
		Schochetman G, Fine DL. Natural distribution of squirrel monkey retrovirus proviral sequences in primate DNAs. J Gen Virol. 1978 Jul;40(1):257-61. PubMed PMID: 99487.
		Devare SG, Hanson RE Jr, Stephenson JR. Primate retroviruses: envelope glycoproteins of endogenous type C and type D viruses possess common interspecies antigenic determinants. J Virol. 1978 May;26(2):316-24. PubMed PMID: 77909; PubMed Central PMCID: PMC354070.
		Benveniste RE, Wilson GL, Todaro GJ. Skunks have gene sequences in their cellular DNA related to squirrel monkey retrovirus: transmission between species of a new world primate endogenous type D retrovirus. Biochem Biophys Res Commun. 1978 Apr 28;81(4):1363-9. PubMed PMID: 96832.
		Devare SG, Arthur LO, Fine DL, Stephenson JR. Primate retroviruses: immunological cross-reactivity between major structural proteins of new and old world primate virus isolates. J Virol. 1978 Mar;25(3):797-805. PubMed PMID: 76686; PubMed Central PMCID: PMC525973.
		Colcher D, Teramoto YA, Schlom J. Interspecies radioimmunoassay for the major structural proteins of primate type-D retroviruses. Proc Natl Acad Sci U S A. 1977 Dec;74(12):5739-43. PubMed PMID: 202962; PubMed Central PMCID: PMC431869.
		Hino S, Tronick SR, Heberling RL, Kalter SS, Hellman A, Aaronson SA. Endogenous New World primate retrovirus: interspecies antigenic determinants shared with the major structural protein of type-D RNA viruses of Old World monkeys. Proc Natl Acad Sci U S A. 1977 Dec;74(12):5734-8. PubMed PMID: 74833; PubMed Central PMCID: PMC431868.
		Colcher D, Heberling RL, Kalter SS, Schlom J. Squirrel monkey retrovirus: an endogenous virus of a new world primate. J Virol. 1977 Aug;23(2):294-301. PubMed PMID: 69724; PubMed Central PMCID: PMC515831.
Miopithecus talapoin	Angolan talapoin	van der Kuyl AC, Dekker JT, Goudsmit J. Primate genus Miopithecus: evidencefor the existence of species and subspecies of dwarf guenons based on cellularand endogenous viral sequences. Mol Phylogenet Evol. 2000 Mar;14(3):403-13.PubMed PMID: 10712845.
Macaca fascicularis	Crab eating macaque	Marsh AK, Willer DO, Skokovets O, Iwajomo OH, Chan JK, MacDonald KS. Evaluation of cynomolgus macaque (Macaca fascicularis) endogenous retrovirus expression following simian immunodeficiency virus infection. PLoS One. 2012;7(6):e40158. doi: 10.1371/journal.pone.0040158. Epub 2012 Jun 29. PubMed PMID: 22768246; PubMed Central PMCID: PMC3387136.
		Okahara-Narita J, Umeda R, Nakamura S, Mori T, Noce T, Torii R. Induction of pluripotent stem cells from fetal and adult cynomolgus monkey fibroblasts using four human transcription factors. Primates. 2012 Apr;53(2):205-13. doi: 10.1007/s10329-011-0283-1. Epub 2011 Nov 11. PubMed PMID: 22075965.
		Greenwood AD, Vincendeau M, Schmädicke AC, Montag J, Seifarth W, Motzkus D. Bovine spongiform encephalopathy infection alters endogenous retrovirus expression in distinct brain regions of cynomolgus macaques (Macaca fascicularis). Mol Neurodegener. 2011 Jun 23;6(1):44. doi: 10.1186/1750-1326-6-44. PubMed PMID: 21699683; PubMed Central PMCID: PMC3152937.
		Ridolfi B, Catone S, Sgarbanti M, Sernicola L, Battistini A, Parolin C, Titti F, Borsetti A. Generation of a human immunodeficiency virus type 1 chronically infected monkey B cell line expressing low levels of endogenous TRIM5alpha. J Cell Physiol. 2009 Dec;221(3):760-5. doi: 10.1002/jcp.21914. PubMed PMID: 19746418.
		Garkavenko O, Dieckhoff B, Wynyard S, Denner J, Elliott RB, Tan PL, Croxson MC. Absence of transmission of potentially xenotic viruses in a prospective pig to primate islet xenotransplantation study. J Med Virol. 2008 Nov;80(11):2046-52. doi: 10.1002/jmv.21272. PubMed PMID: 18814261.
		Elliott RB, Escobar L, Tan PL, Garkavenko O, Calafiore R, Basta P, Vasconcellos AV, Emerich DF, Thanos C, Bambra C. Intraperitoneal alginate-encapsulated neonatal porcine islets in a placebo-controlled study with 16 diabetic cynomolgus primates. Transplant Proc. 2005 Oct;37(8):3505-8. PubMed PMID: 16298643.
		Winkler ME, Winkler M, Burian R, Hecker J, Loss M, Przemeck M, Lorenz R, Patience C, Karlas A, Sommer S, Denner J, Martin U. Analysis of pig-to-human porcine endogenous retrovirus transmission in a triple-species kidney xenotransplantation model. Transpl Int. 2005 May;17(12):848-58. Epub 2005 Apr 29. PubMed PMID: 15864489.
		Elliott RB, Escobar L, Calafiore R, Basta G, Garkavenko O, Vasconcellos A, Bambra C. Transplantation of micro- and macroencapsulated piglet islets into mice and monkeys. Transplant Proc. 2005 Jan-Feb;37(1):466-9. PubMed PMID: 15808678.
		Denner J. Porcine endogenous retroviruses (PERVs) and xenotransplantation: screening for transmission in several clinical trials and in experimental models using non-human primates. Ann Transplant. 2003;8(3):39-48. PubMed PMID: 15114938.
		Allain JE, Dagher I, Mahieu-Caputo D, Loux N, Andreoletti M, Westerman K, Briand P, Franco D, Leboulch P, Weber A. Immortalization of a primate bipotent epithelial liver stem cell. Proc Natl Acad Sci U S A. 2002 Mar 19;99(6):3639-44. PubMed PMID: 11904425; PubMed Central PMCID: PMC122576.
		Kim HS, Hyun BH, Takenaka O. Isolation and phylogeny of endogenous retrovirus HERV-F family in Old World monkeys. Brief report. Arch Virol. 2002;147(2):393-400. PubMed PMID: 11890530.
		Hanazono Y, Terao K, Ozawa K. Gene transfer into nonhuman primate hematopoietic stem cells: implications for gene therapy. Stem Cells. 2001;19(1):12-23. Review. PubMed PMID: 11209087.
		Winkler ME, Martin U, Loss M, Arends H, Rensing S, Kaup FJ, Hedrich HJ, Klempnauer J, Winkler M. Porcine endogenous retrovirus is not transmitted in a discordant porcine-to-cynomolgus xenokidney transplantation model with long-term survival of organ recipients. Transplant Proc. 2000 Aug;32(5):1162. PubMed PMID: 10936401.
		Donner H, Tönjes RR, Bontrop RE, Kurth R, Usadel KH, Badenhoop K. Intronic sequence motifs of HLA-DQB1 are shared between humans, apes and Old World monkeys, but a retroviral LTR element (DQLTR3) is human specific. Tissue Antigens. 1999 Jun;53(6):551-8. PubMed PMID: 10395105.
		Mayer J, Meese E, Mueller-Lantzsch N. Human endogenous retrovirus K homologous sequences and their coding capacity in Old World primates. J Virol. 1998 Mar;72(3):1870-5. PubMed PMID: 9499038; PubMed Central PMCID: PMC109477.
		Eglitis MA, Kantoff PW, McLachlin JR, Gillio A, Flake AW, Bordignon C, Moen RC, Karson EM, Zwiebel JA, Kohn DB, et al. Gene therapy: efforts at developing large animal models for autologous bone marrow transplant and gene transfer with retroviral vectors. Ciba Found Symp. 1987;130:229-46. PubMed PMID: 3327664.
		Thiry L, Sprecher-Goldberger S, Hard RC, Bossens M, Neuray F. Expression of retrovirus-related antigen in pregnancy. I. Antigens cross-reacting with simian retroviruses in human foetal tissues and cord blood lymphocytes. J Reprod Immunol. 1981 Mar;2(6):309-22. PubMed PMID: 7218220.
Cercocebus atys	Sooty mangabey	Pertel T, Reinhard C, Luban J. Vpx rescues HIV-1 transduction of dendriticcells from the antiviral state established by type 1 interferon. Retrovirology.2011 Jun 22;8:49. doi: 10.1186/1742-4690-8-49. PubMed PMID: 21696578; PubMedCentral PMCID: PMC3130655.
Macaca mulatta	Rhesus macaque/monkey	Sacha JB, Kim IJ, Chen L, Ullah JH, Goodwin DA, Simmons HA, Schenkman DI, von Pelchrzim F, Gifford RJ, Nimityongskul FA, Newman LP, Wildeboer S, Lappin PB, Hammond D, Castrovinci P, Piaskowski SM, Reed JS, Beheler KA, Tharmanathan T, Zhang N, Muscat-King S, Rieger M, Fernandes C, Rumpel K, Gardner JP 2nd, Gebhard DH, Janies J, Shoieb A, Pierce BG, Trajkovic D, Rakasz E, Rong S, McCluskie M, Chris…
		Kim YJ, Huh JW, Kim DS, Han K, Kim HM, Kim HS. Evolutionary diversification of DYX1C1 transcripts via an HERV-H LTR integration event. Genes Genet Syst. 2011;86(4):277-84. PubMed PMID: 22214596.
		Katoh I, Mírová A, Kurata S, Murakami Y, Horikawa K, Nakakuki N, Sakai T, Hashimoto K, Maruyama A, Yonaga T, Fukunishi N, Moriishi K, Hirai H. Activation of the long terminal repeat of human endogenous retrovirus K by melanoma-specific transcription factor MITF-M. Neoplasia. 2011 Nov;13(11):1081-92. PubMed PMID: 22131883; PubMed Central PMCID: PMC3223611.
		Niu AL, Wang YQ, Zhang H, Liao CH, Wang JK, Zhang R, Che J, Su B. Rapid evolution and copy number variation of primate RHOXF2, an X-linked homeobox gene involved in male reproduction and possibly brain function. BMC Evol Biol. 2011 Oct 12;11:298. doi: 10.1186/1471-2148-11-298. PubMed PMID: 21988730; PubMed Central PMCID: PMC3214919.
		Lee J, Cho YD, Heo YK, Kwon Y, Kim DG, Choi BS, Kim SS, Kim YB. Reduction of N-tropic mutant porcine endogenous retrovirus infectivity by human tripartite motif-containing 5-isoform alpha. Transplant Proc. 2011 Sep;43(7):2774-8. doi: 10.1016/j.transproceed.2011.04.014. PubMed PMID: 21911161.
		Pertel T, Reinhard C, Luban J. Vpx rescues HIV-1 transduction of dendritic cells from the antiviral state established by type 1 interferon. Retrovirology. 2011 Jun 22;8:49. doi: 10.1186/1742-4690-8-49. PubMed PMID: 21696578; PubMed Central PMCID: PMC3130655.
		Zhang J, Ge W, Zhan P, De Clercq E, Liu X. Retroviral restriction factors TRIM5α: therapeutic strategy to inhibit HIV-1 replication. Curr Med Chem. 2011;18(17):2649-54. Review. PubMed PMID: 21568899.
		Kim DS, Hahn Y. Identification of human-specific transcript variants induced by DNA insertions in the human genome. Bioinformatics. 2011 Jan 1;27(1):14-21. doi: 10.1093/bioinformatics/btq612. Epub 2010 Oct 29. PubMed PMID: 21037245.
		Mattiuzzo G, Takeuchi Y. Suboptimal porcine endogenous retrovirus infection in non-human primate cells: implication for preclinical xenotransplantation. PLoS One. 2010 Oct 6;5(10):e13203. doi: 10.1371/journal.pone.0013203. PubMed PMID: 20949092; PubMed Central PMCID: PMC2950858.
		Karlas A, Irgang M, Votteler J, Specke V, Ozel M, Kurth R, Denner J. Characterisation of a human cell-adapted porcine endogenous retrovirus PERV-A/C. Ann Transplant. 2010 Apr-Jun;15(2):45-54. PubMed PMID: 20657519.
		Kim DS, Hahn Y. Human-specific antisense transcripts induced by the insertion of transposable element. Int J Mol Med. 2010 Jul;26(1):151-7. PubMed PMID: 20514435.
		Specke V, Plesker R, Wood J, Coulibaly C, Suling K, Patience C, Kurth R, Schuurman HJ, Denner J. No in vivo infection of triple immunosuppressed non-human primates after inoculation with high titers of porcine endogenous retroviruses. Xenotransplantation. 2009 Jan-Feb;16(1):34-44. doi: 10.1111/j.1399-3089.2009.00508.x. PubMed PMID: 19243559.
		Wood A, Webb BL, Bartosch B, Schaller T, Takeuchi Y, Towers GJ. Porcine endogenous retroviruses PERV A and A/C recombinant are insensitive to a range of divergent mammalian TRIM5alpha proteins including human TRIM5alpha. J Gen Virol. 2009 Mar;90(Pt 3):702-9. doi: 10.1099/vir.0.007377-0. PubMed PMID: 19218217; PubMed Central PMCID: PMC2885064.
		Perez-Caballero D, Soll SJ, Bieniasz PD. Evidence for restriction of ancient primate gammaretroviruses by APOBEC3 but not TRIM5alpha proteins. PLoS Pathog. 2008 Oct;4(10):e1000181. doi: 10.1371/journal.ppat.1000181. Epub 2008 Oct 17. PubMed PMID: 18927623; PubMed Central PMCID: PMC2564838.
		Diehl WE, Stansell E, Kaiser SM, Emerman M, Hunter E. Identification of postentry restrictions to Mason-Pfizer monkey virus infection in New World monkey cells. J Virol. 2008 Nov;82(22):11140-51. doi: 10.1128/JVI.00269-08. Epub 2008 Sep 17. PubMed PMID: 18799582; PubMed Central PMCID: PMC2573280.
		Kar AK, Diaz-Griffero F, Li Y, Li X, Sodroski J. Biochemical and biophysical characterization of a chimeric TRIM21-TRIM5alpha protein. J Virol. 2008 Dec;82(23):11669-81. doi: 10.1128/JVI.01559-08. Epub 2008 Sep 17. PubMed PMID: 18799572; PubMed Central PMCID: PMC2583655.
		Kim HS, Kim DS, Huh JW, Ahn K, Yi JM, Lee JR, Hirai H. Molecular characterization of the HERV-W env gene in humans and primates: expression, FISH, phylogeny, and evolution. Mol Cells. 2008 Jul 31;26(1):53-60. Epub 2008 Jun 4. PubMed PMID: 18525236.
		Rold CJ, Aiken C. Proteasomal degradation of TRIM5alpha during retrovirus restriction. PLoS Pathog. 2008 May 23;4(5):e1000074. doi: 10.1371/journal.ppat.1000074. PubMed PMID: 18497858; PubMed Central PMCID: PMC2374908.
		Doxiadis GG, de Groot N, Bontrop RE. Impact of endogenous intronic retroviruses on major histocompatibility complex class II diversity and stability. J Virol. 2008 Jul;82(13):6667-77. doi: 10.1128/JVI.00097-08. Epub 2008 Apr 30. PubMed PMID: 18448532; PubMed Central PMCID: PMC2447082.
		Ji X, Zhao S. DA and Xiao-two giant and composite LTR-retrotransposon-like elements identified in the human genome. Genomics. 2008 Mar;91(3):249-58. PubMed PMID: 18083327; PubMed Central PMCID: PMC3092482.
		Romano CM, de Melo FL, Corsini MA, Holmes EC, Zanotto PM. Demographic histories of ERV-K in humans, chimpanzees and rhesus monkeys. PLoS One. 2007 Oct 10;2(10):e1026. PubMed PMID: 17925874; PubMed Central PMCID: PMC2001186.
		Kaiser SM, Malik HS, Emerman M. Restriction of an extinct retrovirus by the human TRIM5alpha antiviral protein. Science. 2007 Jun 22;316(5832):1756-8. PubMed PMID: 17588933.
		Han K, Konkel MK, Xing J, Wang H, Lee J, Meyer TJ, Huang CT, Sandifer E, Hebert K, Barnes EW, Hubley R, Miller W, Smit AF, Ullmer B, Batzer MA. Mobile DNA in Old World monkeys: a glimpse through the rhesus macaque genome. Science. 2007 Apr 13;316(5822):238-40. PubMed PMID: 17431169.
		Nandi JS, Van Dooren S, Chhangani AK, Mohnot SM. New simian beta retroviruses from rhesus monkeys (Macaca mulatta) and langurs (Semnopithecus entellus) from Rajasthan, India. Virus Genes. 2006 Aug;33(1):107-16. PubMed PMID: 16791425.
		Saenz DT, Teo W, Olsen JC, Poeschla EM. Restriction of feline immunodeficiency virus by Ref1, Lv1, and primate TRIM5alpha proteins. J Virol. 2005 Dec;79(24):15175-88. PubMed PMID: 16306589; PubMed Central PMCID: PMC1316021.
		Berthoux L, Sebastian S, Sayah DM, Luban J. Disruption of human TRIM5alpha antiviral activity by nonhuman primate orthologues. J Virol. 2005 Jun;79(12):7883-8. PubMed PMID: 15919943; PubMed Central PMCID: PMC1143641.
		Sawyer SL, Wu LI, Emerman M, Malik HS. Positive selection of primate TRIM5alpha identifies a critical species-specific retroviral restriction domain. Proc Natl Acad Sci U S A. 2005 Feb 22;102(8):2832-7. Epub 2005 Feb 2. PubMed PMID: 15689398; PubMed Central PMCID: PMC549489.
		Denner J. Porcine endogenous retroviruses (PERVs) and xenotransplantation: screening for transmission in several clinical trials and in experimental models using non-human primates. Ann Transplant. 2003;8(3):39-48. PubMed PMID: 15114938.
		Hervé CA, Forrest G, Löwer R, Griffiths DJ, Venables PJ. Conservation and loss of the ERV3 open reading frame in primates. Genomics. 2004 May;83(5):940-3. PubMed PMID: 15081124.
		Shi PA, De Angioletti M, Donahue RE, Notaro R, Luzzatto L, Dunbar CE. In vivo gene marking of rhesus macaque long-term repopulating hematopoietic cells using a VSV-G pseudotyped versus amphotropic oncoretroviral vector. J Gene Med. 2004 Apr;6(4):367-73. PubMed PMID: 15079811.
		Hu J, Kelly P, Bonifacino A, Agricola B, Donahue R, Vanin E, Dunbar CE. Direct comparison of RD114-pseudotyped versus amphotropic-pseudotyped retroviral vectors for transduction of rhesus macaque long-term repopulating cells. Mol Ther. 2003 Oct;8(4):611-7. PubMed PMID: 14529834.
		Okulicz WC, Ace CI. Temporal regulation of gene expression during the expected window of receptivity in the rhesus monkey endometrium. Biol Reprod. 2003 Nov;69(5):1593-9. Epub 2003 Jul 9. PubMed PMID: 12855598.
		Ritzhaupt A, Van Der Laan LJ, Salomon DR, Wilson CA. Porcine endogenous retrovirus infects but does not replicate in nonhuman primate primary cells and cell lines. J Virol. 2002 Nov;76(22):11312-20. PubMed PMID: 12388691; PubMed Central PMCID: PMC136785.
		Specke V, Schuurman HJ, Plesker R, Coulibaly C, Ozel M, Langford G, Kurth R, Denner J. Virus safety in xenotransplantation: first exploratory in vivo studies in small laboratory animals and non-human primates. Transpl Immunol. 2002 May;9(2-4):281-8. PubMed PMID: 12180842.
		Purcell DF. Pathogenesis of replication competent retroviruses derived from mouse cells in immunosuppressed primates: implications for use of neoplastic cells as vaccine substrates. Dev Biol (Basel). 2001;106:187-98; discussion 199, 253-63. PubMed PMID: 11761231.
		Schneider PM, Witzel-Schlömp K, Steinhauer C, Stradmann-Bellinghausen B, Rittner C. Rapid detection of the ERV-K(C4) retroviral insertion reveals further structural polymorphism of the complement C4 genes in old world primates. Exp Clin Immunogenet. 2001;18(3):130-4. PubMed PMID: 11549842.
		Switzer WM, Michler RE, Shanmugam V, Matthews A, Hussain AI, Wright A, Sandstrom P, Chapman LE, Weber C, Safley S, Denny RR, Navarro A, Evans V, Norin AJ, Kwiatkowski P, Heneine W. Lack of cross-species transmission of porcine endogenous retrovirus infection to nonhuman primate recipients of porcine cells, tissues, or organs. Transplantation. 2001 Apr 15;71(7):959-65. PubMed PMID: 11349732.
		Galvin TA, Muller J, Khan AS. Effect of different promoters on immune responses elicited by HIV-1 gag/env multigenic DNA vaccine in Macaca mulatta and Macaca nemestrina. Vaccine. 2000 May 22;18(23):2566-83. PubMed PMID: 10775791.
		Kim HS, Wadekar RV, Takenaka O, Hyun BH, Crow TJ. Phylogenetic analysis of HERV-K LTR-like elements in primates: presence in some new world monkeys and evidence of recent parallel evolution in these species and in homo sapiens. Arch Virol. 1999;144(10):2035-40. PubMed PMID: 10550675.
		Kjellman C, Sjögren HO, Widegren B. HERV-F, a new group of human endogenous retrovirus sequences. J Gen Virol. 1999 Sep;80 ( Pt 9):2383-92. PubMed PMID: 10501491.
		Donner H, Tönjes RR, Bontrop RE, Kurth R, Usadel KH, Badenhoop K. Intronic sequence motifs of HLA-DQB1 are shared between humans, apes and Old World monkeys, but a retroviral LTR element (DQLTR3) is human specific. Tissue Antigens. 1999 Jun;53(6):551-8. PubMed PMID: 10395105.
		Havenga MJ, Werner AB, Valerio D, van Es HH. A flow cytometric assay enabling specific detection of the human lysosomal enzyme, beta-glucocerebrosidase. Anal Biochem. 1998 Aug 15;262(1):57-66. PubMed PMID: 9735148.
		Harris JR. Placental endogenous retrovirus (ERV): structural, functional, and evolutionary significance. Bioessays. 1998 Apr;20(4):307-16. Review. PubMed PMID: 9619102.
		Mayer J, Meese E, Mueller-Lantzsch N. Human endogenous retrovirus K homologous sequences and their coding capacity in Old World primates. J Virol. 1998 Mar;72(3):1870-5. PubMed PMID: 9499038; PubMed Central PMCID: PMC109477.
		Reiprich S, Gundlach BR, Fleckenstein B, Uberla K. Replication-competent chimeric lenti-oncovirus with expanded host cell tropism. J Virol. 1997 Apr;71(4):3328-31. PubMed PMID: 9060704; PubMed Central PMCID: PMC191473.
		Purcell DF, Broscius CM, Vanin EF, Buckler CE, Nienhuis AW, Martin MA. An array of murine leukemia virus-related elements is transmitted and expressed in a primate recipient of retroviral gene transfer. J Virol. 1996 Feb;70(2):887-97. PubMed PMID: 8551628; PubMed Central PMCID: PMC189892.
		Steinhuber S, Brack M, Hunsmann G, Schwelberger H, Dierich MP, Vogetseder W. Distribution of human endogenous retrovirus HERV-K genomes in humans and different primates. Hum Genet. 1995 Aug;96(2):188-92. PubMed PMID: 7635468.
		Vanin EF, Kaloss M, Broscius C, Nienhuis AW. Characterization of replication-competent retroviruses from nonhuman primates with virus-induced T-cell lymphomas and observations regarding the mechanism of oncogenesis. J Virol. 1994 Jul;68(7):4241-50. PubMed PMID: 8207799; PubMed Central PMCID: PMC236347.
		Sakurai H. [Molecular analysis of new human endogenous retroviruses]. Hokkaido Igaku Zasshi. 1993 Nov;68(6):907-20. Japanese. PubMed PMID: 7906666.
		Horwitz MS, Boyce-Jacino MT, Faras AJ. Novel human endogenous sequences related to human immunodeficiency virus type 1. J Virol. 1992 Apr;66(4):2170-9. PubMed PMID: 1548756; PubMed Central PMCID: PMC289009.
		Eglitis MA, Kantoff PW, McLachlin JR, Gillio A, Flake AW, Bordignon C, Moen RC, Karson EM, Zwiebel JA, Kohn DB, et al. Gene therapy: efforts at developing large animal models for autologous bone marrow transplant and gene transfer with retroviral vectors. Ciba Found Symp. 1987;130:229-46. PubMed PMID: 3327664.
		Barker CS, Wills JW, Bradac JA, Hunter E. Molecular cloning of the Mason-Pfizer monkey virus genome: characterization and cloning of subgenomic fragments. Virology. 1985 Apr 30;142(2):223-40. PubMed PMID: 2997984.
		Stromberg K, Benveniste R. Efficient isolation of endogenous rhesus retrovirus from trophoblast. Virology. 1983 Jul 30;128(2):518-23. PubMed PMID: 6310872.
		Hefti E, Ip J, Giddens WE Jr, Panem S. Isolation of a unique retrovirus, MNV-1, from Macaca nemestrina. Virology. 1983 Jun;127(2):309-19. PubMed PMID: 6868369.
		Fine DL, Arthur LO. Expression of natural antibodies against endogenous and horizontally transmitted macaque retroviruses in captive primates. Virology. 1981 Jul 15;112(1):49-61. PubMed PMID: 6166123.
		Thiry L, Sprecher-Goldberger S, Hard RC, Bossens M, Neuray F. Expression of retrovirus-related antigen in pregnancy. I. Antigens cross-reacting with simian retroviruses in human foetal tissues and cord blood lymphocytes. J Reprod Immunol. 1981 Mar;2(6):309-22. PubMed PMID: 7218220.
		Tainsky MA. Analysis of the virogenes related to the rhesus monkey endogenous type C retrovirus in monkeys and apes. J Virol. 1981 Mar;37(3):922-30. PubMed PMID: 6262537; PubMed Central PMCID: PMC171089.
		Rabin H, Benton CV, Tainsky MA, Rice NR, Gilden RV. Isolation and characterization of an endogenous type C virus of rhesus monkeys. Science. 1979 May 25;204(4395):841-2. PubMed PMID: 87013.
		Drohan W, Colcher D, Schlom J. Use of molecular hybridization to detect type D retrovirus markers in rhesus placentas and other tissues. Cancer Res. 1979 May;39(5):1696-701. PubMed PMID: 106962.
		Fine D, Schochetman G. Type D primate retroviruses: a review. Cancer Res. 1978 Oct;38(10):3123-39. Review. PubMed PMID: 80259.
		Marcus SL, Sarkar NH, Modak MJ. Template-specific requirements for DNA synthesis by the Mason-Pfizer monkey virus DNA polymerase: unique aspects. Biochim Biophys Acta. 1978 Jul 24;519(2):317-30. PubMed PMID: 78724.
Saguinus oedipus	Common-top tamarin	Steinhuber S, Brack M, Hunsmann G, Schwelberger H, Dierich MP, Vogetseder W. Distribution of human endogenous retrovirus HERV-K genomes in humans and different primates. Hum Genet. 1995 Aug;96(2):188-92. PubMed PMID: 7635468.
Macaca nemestrina	Pig-tailed macaque	Specke V, Plesker R, Wood J, Coulibaly C, Suling K, Patience C, Kurth R, Schuurman HJ, Denner J. No in vivo infection of triple immunosuppressed non-human primates after inoculation with high titers of porcine endogenous retroviruses. Xenotransplantation. 2009 Jan-Feb;16(1):34-44. doi: 10.1111/j.1399-3089.2009.00508.x. PubMed PMID: 19243559.
		Denner J. Porcine endogenous retroviruses (PERVs) and xenotransplantation: screening for transmission in several clinical trials and in experimental models using non-human primates. Ann Transplant. 2003;8(3):39-48. PubMed PMID: 15114938.
		Specke V, Schuurman HJ, Plesker R, Coulibaly C, Ozel M, Langford G, Kurth R, Denner J. Virus safety in xenotransplantation: first exploratory in vivo studies in small laboratory animals and non-human primates. Transpl Immunol. 2002 May;9(2-4):281-8. PubMed PMID: 12180842.
		Galvin TA, Muller J, Khan AS. Effect of different promoters on immune responses elicited by HIV-1 gag/env multigenic DNA vaccine in Macaca mulatta and Macaca nemestrina. Vaccine. 2000 May 22;18(23):2566-83. PubMed PMID: 10775791.
		Donner H, Tönjes RR, Bontrop RE, Kurth R, Usadel KH, Badenhoop K. Intronic sequence motifs of HLA-DQB1 are shared between humans, apes and Old World monkeys, but a retroviral LTR element (DQLTR3) is human specific. Tissue Antigens. 1999 Jun;53(6):551-8. PubMed PMID: 10395105.
		Hefti E, Ip J, Giddens WE Jr, Panem S. Isolation of a unique retrovirus, MNV-1, from Macaca nemestrina. Virology. 1983 Jun;127(2):309-19. PubMed PMID: 6868369.
Macaca silenus	Lion-tailed macaque	Steinhuber S, Brack M, Hunsmann G, Schwelberger H, Dierich MP, Vogetseder W. Distribution of human endogenous retrovirus HERV-K genomes in humans and different primates. Hum Genet. 1995 Aug;96(2):188-92. PubMed PMID: 7635468.
Phacochoerus africanus	Warthog	Patience C, Switzer WM, Takeuchi Y, Griffiths DJ, Goward ME, Heneine W, Stoye JP, Weiss RA. Multiple groups of novel retroviral genomes in pigs and relatedspecies. J Virol. 2001 Mar;75(6):2771-5. PubMed PMID: 11222700; PubMed CentralPMCID: PMC115901.
Macaca fuscata	Japanese macaque	Yi JM, Takenaka O, Kim HS. Molecular cloning and phylogeny of HERV-E family that is expressed in Japanese monkey (Macaca fuscata) tissues. Arch Virol. 2005 May;150(5):869-82. Epub 2005 Jan 27. PubMed PMID: 15834513.
		Yi JM, Takenaka O, Kim HS. Expression and identification of HERV-W family in Japanese monkeys (Macaca fuscata). Zoolog Sci. 2004 Jun;21(6):649-59. PubMed PMID: 15226587.
		Yi JM, Takenaka O, Kim HS. Molecular characterization and phylogenetic relationship of HERV-W family in the Macaca fuscata. Arch Virol. 2003 Aug;148(8):1613-22. PubMed PMID: 12898334.
Papio cynocephalus	Yellow baboon	Mang R, Maas J, van Der Kuyl AC, Goudsmit J. Papio cynocephalus endogenous retrovirus among old world monkeys: evidence for coevolution and ancient cross-species transmissions. J Virol. 2000 Feb;74(3):1578-86. PubMed PMID: 10627573; PubMed Central PMCID: PMC111497.
		van der Kuyl AC, Dekker JT, Goudsmit J. Discovery of a new endogenous type C retrovirus (FcEV) in cats: evidence for RD-114 being an FcEV(Gag-Pol)/baboon endogenous virus BaEV(Env) recombinant. J Virol. 1999 Oct;73(10):7994-8002. PubMed PMID: 10482547; PubMed Central PMCID: PMC112814.
		Mang R, Goudsmit J, van der Kuyl AC. Novel endogenous type C retrovirus in baboons: complete sequence, providing evidence for baboon endogenous virus gag-pol ancestry. J Virol. 1999 Aug;73(8):7021-6. PubMed PMID: 10400802; PubMed Central PMCID: PMC112789.
		van der Kuyl AC, Dekker JT, Goudsmit J. Full-length proviruses of baboon endogenous virus (BaEV) and dispersed BaEV reverse transcriptase retroelements in the genome of baboon species. J Virol. 1995 Sep;69(9):5917-24. PubMed PMID: 7543595; PubMed Central PMCID: PMC189475.
		Gelmann EP, Josephs SF, Wong-Staal F. Two strains of baboon endogenous virus demonstrate a high degree of genetic conservation. Gene. 1983 Jan-Feb;21(1-2):161-4. PubMed PMID: 6301945.
Mandrillus sphinx	Mandrill	van der Kuyl AC, Dekker JT, Goudsmit J. Distribution of baboon endogenous virus among species of African monkeys suggests multiple ancient cross-species transmissions in shared habitats. J Virol. 1995 Dec;69(12):7877-87. PubMed PMID: 7494300; PubMed Central PMCID: PMC189732.
Macaca arctoides	Stump-tailed macaque	Stromberg K, Benveniste R. Efficient isolation of endogenous rhesus retrovirus from trophoblast. Virology. 1983 Jul 30;128(2):518-23. PubMed PMID: 6310872.
		Rabin H, Benton CV, Tainsky MA, Rice NR, Gilden RV. Isolation and characterization of an endogenous type C virus of rhesus monkeys. Science. 1979 May 25;204(4395):841-2. PubMed PMID: 87013.
		Todaro GJ, Benveniste RE, Sherwin SA, Sherr CJ. MAC-1, a new genetically transmitted type C virus of primates: "low frequency" activation from stumptail monkey cell cultures. Cell. 1978 Apr;13(4):775-82. PubMed PMID: 207440.
Papio anubis	Olive baboon	Mwenda JM, Sichangi MW, Oduor-Okello D, Wango EO, Langat DK. Human endogenous retrovirus-R (ERV 3) env-like antigens expressed in baboon testes and epididymides. East Afr Med J. 2003 May;80(5):264-70. PubMed PMID: 16167743.
		Gelmann EP, Josephs SF, Wong-Staal F. Two strains of baboon endogenous virus demonstrate a high degree of genetic conservation. Gene. 1983 Jan-Feb;21(1-2):161-4. PubMed PMID: 6301945.
Papio hamadryas	Hamadryas baboon	Specke V, Schuurman HJ, Plesker R, Coulibaly C, Ozel M, Langford G, Kurth R, Denner J. Virus safety in xenotransplantation: first exploratory in vivo studies in small laboratory animals and non-human primates. Transpl Immunol. 2002 May;9(2-4):281-8. PubMed PMID: 12180842.
		Blusch JH, Patience C, Takeuchi Y, Templin C, Roos C, Von Der Helm K, Steinhoff G, Martin U. Infection of nonhuman primate cells by pig endogenous retrovirus. J Virol. 2000 Aug;74(16):7687-90. PubMed PMID: 10906227; PubMed Central PMCID: PMC112294.
Papio papio	Guinea baboon	Donner H, Tönjes RR, Bontrop RE, Kurth R, Usadel KH, Badenhoop K. Intronic sequence motifs of HLA-DQB1 are shared between humans, apes and Old World monkeys, but a retroviral LTR element (DQLTR3) is human specific. Tissue Antigens. 1999 Jun;53(6):551-8. PubMed PMID: 10395105.
Semnopithecus entellus	Hanuman langur	Nandi JS, Van Dooren S, Chhangani AK, Mohnot SM. New simian beta retroviruses from rhesus monkeys (Macaca mulatta) and langurs (Semnopithecus entellus) from Rajasthan, India. Virus Genes. 2006 Aug;33(1):107-16. PubMed PMID: 16791425.
		Sommerfelt MA, Harkestad N, Hunter E. The endogenous langur type D retrovirus PO-1-Lu and its exogenous counterparts in macaque and langur monkeys. Virology. 2003 Oct 25;315(2):275-82. PubMed PMID: 14585330.
		Nandi JS, Bhavalkar-Potdar V, Tikute S, Raut CG. A novel type D simian retrovirus naturally infecting the Indian Hanuman langur (Semnopithecus entellus). Virology. 2000 Nov 10;277(1):6-13. PubMed PMID: 11062030.
Odocoileus hemionus	Mule deer	Elleder D, Kim O, Padhi A, Bankert JG, Simeonov I, Schuster SC, Wittekindt NE,Motameny S, Poss M. Polymorphic integrations of an endogenous gammaretrovirus in the mule deer genome. J Virol. 2012 Mar;86(5):2787-96. doi: 10.1128/JVI.06859-11.Epub 2011 Dec 21. PubMed PMID: 22190723; PubMed Central PMCID: PMC3302240.
Hylobates lar	Gibbon	Cui J, Tachedjian G, Tachedjian M, Holmes EC, Zhang S, Wang LF. Identification of diverse groups of endogenous gammaretroviruses in mega- and microbats. J Gen Virol. 2012 Sep;93(Pt 9):2037-45. doi: 10.1099/vir.0.043760-0. Epub 2012 Jun 13. PubMed PMID: 22694899.
		Niu AL, Wang YQ, Zhang H, Liao CH, Wang JK, Zhang R, Che J, Su B. Rapid evolution and copy number variation of primate RHOXF2, an X-linked homeobox gene involved in male reproduction and possibly brain function. BMC Evol Biol. 2011 Oct 12;11:298. doi: 10.1186/1471-2148-11-298. PubMed PMID: 21988730; PubMed Central PMCID: PMC3214919.
		Lin EH, Salon C, Brambilla E, Lavillette D, Szecsi J, Cosset FL, Coll JL. Fusogenic membrane glycoproteins induce syncytia formation and death in vitro and in vivo: a potential therapy agent for lung cancer. Cancer Gene Ther. 2010 Apr;17(4):256-65. doi: 10.1038/cgt.2009.74. Epub 2009 Nov 6. PubMed PMID: 19893593.
		Tarlinton R, Meers J, Young P. Biology and evolution of the endogenous koala retrovirus. Cell Mol Life Sci. 2008 Nov;65(21):3413-21. doi: 10.1007/s00018-008-8499-y. Review. PubMed PMID: 18818870.
		Oliveira NM, Satija H, Kouwenhoven IA, Eiden MV. Changes in viral protein function that accompany retroviral endogenization. Proc Natl Acad Sci U S A. 2007 Oct 30;104(44):17506-11. Epub 2007 Oct 24. PubMed PMID: 17959780; PubMed Central PMCID: PMC2077286.
		Fiebig U, Hartmann MG, Bannert N, Kurth R, Denner J. Transspecies transmission of the endogenous koala retrovirus. J Virol. 2006 Jun;80(11):5651-4. PubMed PMID: 16699047; PubMed Central PMCID: PMC1472152.
		Jang JE, Shaw K, Yu XJ, Petersen D, Pepper K, Lutzko C, Kohn DB. Specific and stable gene transfer to human embryonic stem cells using pseudotyped lentiviral vectors. Stem Cells Dev. 2006 Feb;15(1):109-17. PubMed PMID: 16522168.
		Oliveira NM, Farrell KB, Eiden MV. In vitro characterization of a koala retrovirus. J Virol. 2006 Mar;80(6):3104-7. PubMed PMID: 16501122; PubMed Central PMCID: PMC1395464.
		Yue Y, Grossmann B, Ferguson-Smith M, Yang F, Haaf T. Comparative cytogenetics of human chromosome 3q21.3 reveals a hot spot for ectopic recombination in hominoid evolution. Genomics. 2005 Jan;85(1):36-47. PubMed PMID: 15607420.
		Lavillette D, Kabat D. Porcine endogenous retroviruses infect cells lacking cognate receptors by an alternative pathway: implications for retrovirus evolution and xenotransplantation. J Virol. 2004 Aug;78(16):8868-77. PubMed PMID: 15280495; PubMed Central PMCID: PMC479092.
		Bonnaud B, Bouton O, Oriol G, Cheynet V, Duret L, Mallet F. Evidence of selection on the domesticated ERVWE1 env retroviral element involved in placentation. Mol Biol Evol. 2004 Oct;21(10):1895-901. Epub 2004 Jul 14. PubMed PMID: 15254254.
		Mallet F, Bouton O, Prudhomme S, Cheynet V, Oriol G, Bonnaud B, Lucotte G, Duret L, Mandrand B. The endogenous retroviral locus ERVWE1 is a bona fide gene involved in hominoid placental physiology. Proc Natl Acad Sci U S A. 2004 Feb 10;101(6):1731-6. Epub 2004 Feb 2. PubMed PMID: 14757826; PubMed Central PMCID: PMC341840.
		Strang BL, Ikeda Y, Cosset FL, Collins MK, Takeuchi Y. Characterization of HIV-1 vectors with gammaretrovirus envelope glycoproteins produced from stable packaging cells. Gene Ther. 2004 Apr;11(7):591-8. PubMed PMID: 14724689.
		Blaise S, Ruggieri A, Dewannieux M, Cosset FL, Heidmann T. Identification of an envelope protein from the FRD family of human endogenous retroviruses (HERV-FRD) conferring infectivity and functional conservation among simians. J Virol. 2004 Jan;78(2):1050-4. PubMed PMID: 14694139; PubMed Central PMCID: PMC368808.
		Ward M, Sattler R, Grossman IR, Bell AJ Jr, Skerrett D, Baxi L, Bank A. A stable murine-based RD114 retroviral packaging line efficiently transduces human hematopoietic cells. Mol Ther. 2003 Nov;8(5):804-12. PubMed PMID: 14599814.
		Huh JW, Hong KW, Yi JM, Kim TH, Takenaka O, Lee WH, Kim HS. Molecular phylogeny and evolution of the human endogenous retrovirus HERV-W LTR family in hominoid primates. Mol Cells. 2003 Feb 28;15(1):122-6. PubMed PMID: 12661771.
		Bobkova M, Stitz J, Engelstädter M, Cichutek K, Buchholz CJ. Identification of R-peptides in envelope proteins of C-type retroviruses. J Gen Virol. 2002 Sep;83(Pt 9):2241-6. PubMed PMID: 12185279.
		Lauring AS, Cheng HH, Eiden MV, Overbaugh J. Genetic and biochemical analyses of receptor and cofactor determinants for T-cell-tropic feline leukemia virus infection. J Virol. 2002 Aug;76(16):8069-78. PubMed PMID: 12134012; PubMed Central PMCID: PMC155116.
		Kim HS, Takenaka O. Phylogeny of SINE-R retroposons in Asian apes. Mol Cells. 2001 Oct 31;12(2):262-6. PubMed PMID: 11710532.
		Goerner M, Horn PA, Peterson L, Kurre P, Storb R, Rasko JE, Kiem HP. Sustained multilineage gene persistence and expression in dogs transplanted with CD34(+) marrow cells transduced by RD114-pseudotype oncoretrovirus vectors. Blood. 2001 Oct 1;98(7):2065-70. PubMed PMID: 11567991.
		Schneider PM, Witzel-Schlömp K, Steinhauer C, Stradmann-Bellinghausen B, Rittner C. Rapid detection of the ERV-K(C4) retroviral insertion reveals further structural polymorphism of the complement C4 genes in old world primates. Exp Clin Immunogenet. 2001;18(3):130-4. PubMed PMID: 11549842.
		Lauring AS, Anderson MM, Overbaugh J. Specificity in receptor usage by T-cell-tropic feline leukemia viruses: implications for the in vivo tropism of immunodeficiency-inducing variants. J Virol. 2001 Oct;75(19):8888-98. PubMed PMID: 11533152; PubMed Central PMCID: PMC114457.
		Nadezhdin EV, Lebedev YB, Glazkova DV, Bornholdt D, Arman IP, Grzeschik KH, Hunsmann G, Sverdlov ED. Identification of paralogous HERV-K LTRs on human chromosomes 3, 4, 7 and 11 in regions containing clusters of olfactory receptor genes. Mol Genet Genomics. 2001 Jul;265(5):820-5. PubMed PMID: 11523799.
		Kelly PF, Carrington J, Nathwani A, Vanin EF. RD114-pseudotyped oncoretroviral vectors. Biological and physical properties. Ann N Y Acad Sci. 2001 Jun;938:262-76; discussion 276-7. PubMed PMID: 11458516.
		Gladow M, Becker C, Blankenstein T, Uckert W. MLV-10A1 retrovirus pseudotype efficiently transduces primary human CD4+ T lymphocytes. J Gene Med. 2000 Nov-Dec;2(6):409-15. PubMed PMID: 11199261.
		Hanazono Y, Terao K, Ozawa K. Gene transfer into nonhuman primate hematopoietic stem cells: implications for gene therapy. Stem Cells. 2001;19(1):12-23. Review. PubMed PMID: 11209087.
		Hanger JJ, Bromham LD, McKee JJ, O'Brien TM, Robinson WF. The nucleotide sequence of koala (Phascolarctos cinereus) retrovirus: a novel type C endogenous virus related to Gibbon ape leukemia virus. J Virol. 2000 May;74(9):4264-72. PubMed PMID: 10756041; PubMed Central PMCID: PMC111943.
		Neidhart M, Rethage J, Kuchen S, Künzler P, Crowl RM, Billingham ME, Gay RE, Gay S. Retrotransposable L1 elements expressed in rheumatoid arthritis synovial tissue: association with genomic DNA hypomethylation and influence on gene expression. Arthritis Rheum. 2000 Dec;43(12):2634-47. PubMed PMID: 11145021.
		Tailor CS, Nouri A, Kabat D. Cellular and species resistance to murine amphotropic, gibbon ape, and feline subgroup C leukemia viruses is strongly influenced by receptor expression levels and by receptor masking mechanisms. J Virol. 2000 Oct;74(20):9797-801. PubMed PMID: 11000257; PubMed Central PMCID: PMC112417.
		Uckert W, Becker C, Gladow M, Klein D, Kammertoens T, Pedersen L, Blankenstein T. Efficient gene transfer into primary human CD8+ T lymphocytes by MuLV-10A1 retrovirus pseudotype. Hum Gene Ther. 2000 May 1;11(7):1005-14. PubMed PMID: 10811229.
		Kim HS, Wadekar RV, Takenaka O, Hyun BH, Crow TJ. Phylogenetic analysis of a retroposon family in african great apes. J Mol Evol. 1999 Nov;49(5):699-702. PubMed PMID: 10552051.
		Zhao Y, Jacobs CP, Wang L, Hardies SC. MuERVC: a new family of murine retrovirus-related repetitive sequences and its relationship to previously known families. Mamm Genome. 1999 May;10(5):477-81. PubMed PMID: 10337621.
		Matthews AL, Brown J, Switzer W, Folks TM, Heneine W, Sandstrom PA. Development and validation of a Western immunoblot assay for detection of antibodies to porcine endogenous retrovirus. Transplantation. 1999 Apr 15;67(7):939-43. PubMed PMID: 10221475.
		Wolgamot G, Bonham L, Miller AD. Sequence analysis of Mus dunni endogenous virus reveals a hybrid VL30/gibbon ape leukemia virus-like structure and a distinct envelope. J Virol. 1998 Sep;72(9):7459-66. PubMed PMID: 9696842; PubMed Central PMCID: PMC109979.
		Akiyoshi DE, Denaro M, Zhu H, Greenstein JL, Banerjee P, Fishman JA. Identification of a full-length cDNA for an endogenous retrovirus of miniature swine. J Virol. 1998 May;72(5):4503-7. PubMed PMID: 9557749; PubMed Central PMCID: PMC109691.
		Bonham L, Wolgamot G, Miller AD. Molecular cloning of Mus dunni endogenous virus: an unusual retrovirus in a new murine viral interference group with a wide host range. J Virol. 1997 Jun;71(6):4663-70. PubMed PMID: 9151860; PubMed Central PMCID: PMC191688.
		Porter CD, Collins MK, Tailor CS, Parkar MH, Cosset FL, Weiss RA, Takeuchi Y. Comparison of efficiency of infection of human gene therapy target cells via four different retroviral receptors. Hum Gene Ther. 1996 May 20;7(8):913-9. PubMed PMID: 8727505.
		Seifarth W, Skladny H, Krieg-Schneider F, Reichert A, Hehlmann R, Leib-Mösch C. Retrovirus-like particles released from the human breast cancer cell line T47-D display type B- and C-related endogenous retroviral sequences. J Virol. 1995 Oct;69(10):6408-16. PubMed PMID: 7545247; PubMed Central PMCID: PMC189540.
		Szabó B, Tóth FD, Kiss J, Kiss A, Rák K. Antiretroviral immune response and plasma interferon in different phases of chronic granulocytic leukemia. Leuk Res. 1993 Apr;17(4):311-23. PubMed PMID: 7683737.
		Sommerfelt MA, Weiss RA. Receptor interference groups of 20 retroviruses plating on human cells. Virology. 1990 May;176(1):58-69. PubMed PMID: 1691887.
		Purcell DF, Deacon NJ, McKenzie IF. The human non-lineage antigen CD46 (HuLy-m5) and primate retroviral gp70 molecules share protein-defined antigenic determinants. Immunol Cell Biol. 1989 Oct;67 ( Pt 5):279-89. PubMed PMID: 2482250.
		Maeda S, Yonezawa K, Yachi A. Serum antibody reacting with placental syncytiotrophoblast in sera of patients with autoimmune diseases--a possible relation to type C RNA retrovirus. Clin Exp Immunol. 1985 Jun;60(3):645-53. PubMed PMID: 2990781; PubMed Central PMCID: PMC1577207.
		Jerabek LB, Mellors RC, Elkon KB, Mellors JW. Detection and immunochemical characterization of a primate type C retrovirus-related p30 protein in normal human placentas. Proc Natl Acad Sci U S A. 1984 Oct;81(20):6501-5. PubMed PMID: 6093103; PubMed Central PMCID: PMC391952.
		Anh-Tuan N, Tóth FD, Szabó B, Kiss J, Réthy A, Falus A, Merétey K, Mód A, Füst G, Váczi L, et al. Antibodies to primate retrovirus antigens in circulating immune complexes of patients with acute myeloid leukemia. Leuk Res. 1984;8(5):863-71. PubMed PMID: 6593512.
		Tóth FD, Szabó B, Váczi L, Kiss A, Kovács I, Rák K, Kiss C, Gallo RC. Natural antibodies to simian type-C viruses and human retrovirus HTLV in patients with lymphoid malignancies. Acta Microbiol Hung. 1984;31(4):387-92. PubMed PMID: 6100223.
		Mondal H, Hofschneider PH. Isolation and characterization of retrovirus-like elements from normal human fetuses. Int J Cancer. 1982 Sep 15;30(3):281-7. PubMed PMID: 7129678.
		Bonner TI, Birkenmeier EH, Gonda MA, Mark GE, Searfoss GH, Todaro GJ. Molecular cloning of a family of retroviral sequences found in chimpanzee but not human DNA. J Virol. 1982 Sep;43(3):914-24. PubMed PMID: 6292470; PubMed Central PMCID: PMC256202.
		Cohen M, Rice N, Stephens R, O'Connell C. DNA sequence relationship of the baboon endogenous virus genome to the genomes of other type C and type D retroviruses. J Virol. 1982 Mar;41(3):801-12. PubMed PMID: 6284972; PubMed Central PMCID: PMC256817.
		Lovinger GG, Mark G, Todaro GJ, Schochetman G. 5'-terminal nucleotide noncoding sequences of retroviruses: relatedness of two old world primate type C viruses and avian spleen necrosis virus. J Virol. 1981 Jul;39(1):238-45. PubMed PMID: 6268813; PubMed Central PMCID: PMC171282.
		Tainsky MA. Analysis of the virogenes related to the rhesus monkey endogenous type C retrovirus in monkeys and apes. J Virol. 1981 Mar;37(3):922-30. PubMed PMID: 6262537; PubMed Central PMCID: PMC171089.
		Waters LC, Mullin BC, Bailiff EG, Popp RA. Differential association of transfer RNAs with the genomes of murine, feline and primate retroviruses. Biochim Biophys Acta. 1980 Jun 27;608(1):112-26. PubMed PMID: 6248115.
		Callahan R, Meade C, Todaro GJ. Isolation of an endogenous type C virus related to the infectious primate type C viruses from the Asian rodent Vandeleuria oleracea. J Virol. 1979 Apr;30(1):124-31. PubMed PMID: 90155; PubMed Central PMCID: PMC353306.
		Schochetman G, Fine DL. Natural distribution of squirrel monkey retrovirus proviral sequences in primate DNAs. J Gen Virol. 1978 Jul;40(1):257-61. PubMed PMID: 99487.
		Colcher D, Teramoto YA, Schlom J. Interspecies radioimmunoassay for the major structural proteins of primate type-D retroviruses. Proc Natl Acad Sci U S A. 1977 Dec;74(12):5739-43. PubMed PMID: 202962; PubMed Central PMCID: PMC431869.
		Benveniste RE, Callahan R, Sherr CJ, Chapman V, Todaro GJ. Two distinct endogenous type C viruses isolated from the asian rodent Mus cervicolor: conservation of virogene sequences in related rodent species. J Virol. 1977 Mar;21(3):849-62. PubMed PMID: 66330; PubMed Central PMCID: PMC515622.
Symphalangus syndactylus	Siamang	Yue Y, Grossmann B, Ferguson-Smith M, Yang F, Haaf T. Comparative cytogenetics of human chromosome 3q21.3 reveals a hot spot for ectopic recombination in hominoid evolution. Genomics. 2005 Jan;85(1):36-47. PubMed PMID: 15607420.
Pan troglodytes	Chimpanzee	Katoh I, Kurata S. Association of endogenous retroviruses and long terminal repeats with human disorders. Front Oncol. 2013 Sep 11;3:234. doi: 10.3389/fonc.2013.00234. Review. PubMed PMID: 24062987; PubMed Central PMCID: PMC3769647.
		Contreras-Galindo R, Kaplan MH, He S, Contreras-Galindo AC, Gonzalez-Hernandez MJ, Kappes F, Dube D, Chan SM, Robinson D, Meng F, Dai M, Gitlin SD, Chinnaiyan AM, Omenn GS, Markovitz DM. HIV infection reveals widespread expansion of novel centromeric human endogenous retroviruses. Genome Res. 2013 Sep;23(9):1505-13. doi: 10.1101/gr.144303.112. Epub 2013 May 8. PubMed PMID: 23657884; PubMed Centra…
		Shin W, Lee J, Son SY, Ahn K, Kim HS, Han K. Human-specific HERV-K insertion causes genomic variations in the human genome. PLoS One. 2013 Apr 12;8(4):e60605. doi: 10.1371/journal.pone.0060605. Print 2013. PubMed PMID: 23593260; PubMed Central PMCID: PMC3625200.
		Kim YJ, Lee J, Han K. Transposable Elements: No More 'Junk DNA'. Genomics Inform. 2012 Dec;10(4):226-33. doi: 10.5808/GI.2012.10.4.226. Epub 2012 Dec 31. PubMed PMID: 23346034; PubMed Central PMCID: PMC3543922.
		Baskaev KK, Buzdin AA. [Evolutionary recent insertions of mobile elements and their contribution to the structure of human genome]. Zh Obshch Biol. 2012 Jan-Feb;73(1):3-20. Review. Russian. PubMed PMID: 22567964.
		Salm MP, Horswell SD, Hutchison CE, Speedy HE, Yang X, Liang L, Schadt EE, Cookson WO, Wierzbicki AS, Naoumova RP, Shoulders CC. The origin, global distribution, and functional impact of the human 8p23 inversion polymorphism. Genome Res. 2012 Jun;22(6):1144-53. doi: 10.1101/gr.126037.111. Epub 2012 Mar 7. PubMed PMID: 22399572; PubMed Central PMCID: PMC3371712.
		Niu AL, Wang YQ, Zhang H, Liao CH, Wang JK, Zhang R, Che J, Su B. Rapid evolution and copy number variation of primate RHOXF2, an X-linked homeobox gene involved in male reproduction and possibly brain function. BMC Evol Biol. 2011 Oct 12;11:298. doi: 10.1186/1471-2148-11-298. PubMed PMID: 21988730; PubMed Central PMCID: PMC3214919.
		Kim DS, Hahn Y. Identification of human-specific transcript variants induced by DNA insertions in the human genome. Bioinformatics. 2011 Jan 1;27(1):14-21. doi: 10.1093/bioinformatics/btq612. Epub 2010 Oct 29. PubMed PMID: 21037245.
		Soll SJ, Neil SJ, Bieniasz PD. Identification of a receptor for an extinct virus. Proc Natl Acad Sci U S A. 2010 Nov 9;107(45):19496-501. doi: 10.1073/pnas.1012344107. Epub 2010 Oct 25. PubMed PMID: 20974973; PubMed Central PMCID: PMC2984158.
		Karlas A, Irgang M, Votteler J, Specke V, Ozel M, Kurth R, Denner J. Characterisation of a human cell-adapted porcine endogenous retrovirus PERV-A/C. Ann Transplant. 2010 Apr-Jun;15(2):45-54. PubMed PMID: 20657519.
		Kim DS, Hahn Y. Human-specific antisense transcripts induced by the insertion of transposable element. Int J Mol Med. 2010 Jul;26(1):151-7. PubMed PMID: 20514435.
		Perez-Caballero D, Soll SJ, Bieniasz PD. Evidence for restriction of ancient primate gammaretroviruses by APOBEC3 but not TRIM5alpha proteins. PLoS Pathog. 2008 Oct;4(10):e1000181. doi: 10.1371/journal.ppat.1000181. Epub 2008 Oct 17. PubMed PMID: 18927623; PubMed Central PMCID: PMC2564838.
		Kim HS, Kim DS, Huh JW, Ahn K, Yi JM, Lee JR, Hirai H. Molecular characterization of the HERV-W env gene in humans and primates: expression, FISH, phylogeny, and evolution. Mol Cells. 2008 Jul 31;26(1):53-60. Epub 2008 Jun 4. PubMed PMID: 18525236.
		Doxiadis GG, de Groot N, Bontrop RE. Impact of endogenous intronic retroviruses on major histocompatibility complex class II diversity and stability. J Virol. 2008 Jul;82(13):6667-77. doi: 10.1128/JVI.00097-08. Epub 2008 Apr 30. PubMed PMID: 18448532; PubMed Central PMCID: PMC2447082.
		Buzdin A. Human-specific endogenous retroviruses. ScientificWorldJournal. 2007 Nov 26;7:1848-68. Review. PubMed PMID: 18060323.
		Romano CM, de Melo FL, Corsini MA, Holmes EC, Zanotto PM. Demographic histories of ERV-K in humans, chimpanzees and rhesus monkeys. PLoS One. 2007 Oct 10;2(10):e1026. PubMed PMID: 17925874; PubMed Central PMCID: PMC2001186.
		Kaiser SM, Malik HS, Emerman M. Restriction of an extinct retrovirus by the human TRIM5alpha antiviral protein. Science. 2007 Jun 22;316(5832):1756-8. PubMed PMID: 17588933.
		Huh JW, Kim DS, Ha HS, Kim TH, Kim W, Kim HS. Formation of a new solo-LTR of the human endogenous retrovirus H family in human chromosome 21. Mol Cells. 2006 Dec 31;22(3):360-3. PubMed PMID: 17202866.
		Romano CM, Ramalho RF, Zanotto PM. Tempo and mode of ERV-K evolution in human and chimpanzee genomes. Arch Virol. 2006 Nov;151(11):2215-28. Epub 2006 Jul 10. PubMed PMID: 16830071.
		Polavarapu N, Bowen NJ, McDonald JF. Identification, characterization and comparative genomics of chimpanzee endogenous retroviruses. Genome Biol. 2006;7(6):R51. PubMed PMID: 16805923; PubMed Central PMCID: PMC1779541.
		Jern P, Sperber GO, Blomberg J. Divergent patterns of recent retroviral integrations in the human and chimpanzee genomes: probable transmissions between other primates and chimpanzees. J Virol. 2006 Feb;80(3):1367-75. PubMed PMID: 16415014; PubMed Central PMCID: PMC1346942.
		López-Sánchez P, Costas JC, Naveira HF. Paleogenomic record of the extinction of human endogenous retrovirus ERV9. J Virol. 2005 Jun;79(11):6997-7004. PubMed PMID: 15890939; PubMed Central PMCID: PMC1112121.
		Yohn CT, Jiang Z, McGrath SD, Hayden KE, Khaitovich P, Johnson ME, Eichler MY, McPherson JD, Zhao S, Pääbo S, Eichler EE. Lineage-specific expansions of retroviral insertions within the genomes of African great apes but not humans and orangutans. PLoS Biol. 2005 Apr;3(4):e110. Epub 2005 Mar 1. PubMed PMID: 15737067; PubMed Central PMCID: PMC1054887.
		Bonnaud B, Bouton O, Oriol G, Cheynet V, Duret L, Mallet F. Evidence of selection on the domesticated ERVWE1 env retroviral element involved in placentation. Mol Biol Evol. 2004 Oct;21(10):1895-901. Epub 2004 Jul 14. PubMed PMID: 15254254.
		Bosch E, Hurles ME, Navarro A, Jobling MA. Dynamics of a human interparalog gene conversion hotspot. Genome Res. 2004 May;14(5):835-44. PubMed PMID: 15123583; PubMed Central PMCID: PMC479110.
		Hervé CA, Forrest G, Löwer R, Griffiths DJ, Venables PJ. Conservation and loss of the ERV3 open reading frame in primates. Genomics. 2004 May;83(5):940-3. PubMed PMID: 15081124.
		Mallet F, Bouton O, Prudhomme S, Cheynet V, Oriol G, Bonnaud B, Lucotte G, Duret L, Mandrand B. The endogenous retroviral locus ERVWE1 is a bona fide gene involved in hominoid placental physiology. Proc Natl Acad Sci U S A. 2004 Feb 10;101(6):1731-6. Epub 2004 Feb 2. PubMed PMID: 14757826; PubMed Central PMCID: PMC341840.
		Bénit L, Calteau A, Heidmann T. Characterization of the low-copy HERV-Fc family: evidence for recent integrations in primates of elements with coding envelope genes. Virology. 2003 Jul 20;312(1):159-68. PubMed PMID: 12890629.
		Huh JW, Hong KW, Yi JM, Kim TH, Takenaka O, Lee WH, Kim HS. Molecular phylogeny and evolution of the human endogenous retrovirus HERV-W LTR family in hominoid primates. Mol Cells. 2003 Feb 28;15(1):122-6. PubMed PMID: 12661771.
		Buzdin AA, Lebedev IuB, Sverdlov ED. [Human genome-specific HERV-K intron LTR genes have a random orientation relative to the direction of transcription, and, possibly, participated in antisense gene expression regulation]. Bioorg Khim. 2003 Jan-Feb;29(1):103-6. Russian. PubMed PMID: 12659000.
		Buzdin A, Ustyugova S, Khodosevich K, Mamedov I, Lebedev Y, Hunsmann G, Sverdlov E. Human-specific subfamilies of HERV-K (HML-2) long terminal repeats: three master genes were active simultaneously during branching of hominoid lineages. Genomics. 2003 Feb;81(2):149-56. PubMed PMID: 12620392.
		Mamedov I, Batrak A, Buzdin A, Arzumanyan E, Lebedev Y, Sverdlov ED. Genome-wide comparison of differences in the integration sites of interspersed repeats between closely related genomes. Nucleic Acids Res. 2002 Jul 15;30(14):e71. PubMed PMID: 12136119; PubMed Central PMCID: PMC135772.
		Ondoa P, Vingerhoets J, Vereecken C, van der Groen G, Heeney JL, Kestens L. In vitro replication of SIVcpz is suppressed by beta-chemokines and CD8+ T cells but not by natural killer cells of infected chimpanzees. AIDS Res Hum Retroviruses. 2002 Mar 20;18(5):373-82. PubMed PMID: 11897039.
		Buzdin A, Khodosevich K, Mamedov I, Vinogradova T, Lebedev Y, Hunsmann G, Sverdlov E. A technique for genome-wide identification of differences in the interspersed repeats integrations between closely related genomes and its application to detection of human-specific integrations of HERV-K LTRs. Genomics. 2002 Mar;79(3):413-22. PubMed PMID: 11863371.
		Turner G, Barbulescu M, Su M, Jensen-Seaman MI, Kidd KK, Lenz J. Insertional polymorphisms of full-length endogenous retroviruses in humans. Curr Biol. 2001 Oct 2;11(19):1531-5. PubMed PMID: 11591322.
		Costas J. Evolutionary dynamics of the human endogenous retrovirus family HERV-K inferred from full-length proviral genomes. J Mol Evol. 2001 Sep;53(3):237-43. PubMed PMID: 11523010.
		Barbulescu M, Turner G, Su M, Kim R, Jensen-Seaman MI, Deinard AS, Kidd KK, Lenz J. A HERV-K provirus in chimpanzees, bonobos and gorillas, but not humans. Curr Biol. 2001 May 15;11(10):779-83. PubMed PMID: 11378389.
		Gagneux P, Varki A. Genetic differences between humans and great apes. Mol Phylogenet Evol. 2001 Jan;18(1):2-13. Review. PubMed PMID: 11161737.
		Weiss RA. Ancient and modern retroviruses. Acta Microbiol Immunol Hung. 2000;47(4):403-10. PubMed PMID: 11056760.
		Lapuk AV, Lebedev YuB, Sverdlov ED. Human endogenous retrovirus HERV-K/HERV-H evolution in the genome of primates. Dokl Biochem. 2000 Jul-Aug;373(1-6):150-2. PubMed PMID: 11002847.
		Kim HS, Takenaka O, Crow TJ. Isolation and phylogeny of endogenous retrovirus sequences belonging to the HERV-W family in primates. J Gen Virol. 1999 Oct;80 ( Pt 10):2613-9. PubMed PMID: 10573154.
		Kim HS, Wadekar RV, Takenaka O, Hyun BH, Crow TJ. Phylogenetic analysis of a retroposon family in african great apes. J Mol Evol. 1999 Nov;49(5):699-702. PubMed PMID: 10552051.
		Kim HS, Wadekar RV, Takenaka O, Hyun BH, Crow TJ. Phylogenetic analysis of HERV-K LTR-like elements in primates: presence in some new world monkeys and evidence of recent parallel evolution in these species and in homo sapiens. Arch Virol. 1999;144(10):2035-40. PubMed PMID: 10550675.
		Kjellman C, Sjögren HO, Widegren B. HERV-F, a new group of human endogenous retrovirus sequences. J Gen Virol. 1999 Sep;80 ( Pt 9):2383-92. PubMed PMID: 10501491.
		Kim HS, Wadekar RV, Takenaka O, Winstanley C, Mitsunaga F, Kageyama T, Hyun BH, Crow TJ. SINE-R.C2 (a Homo sapiens specific retroposon) is homologous to CDNA from postmortem brain in schizophrenia and to two loci in the Xq21.3/Yp block linked to handedness and psychosis. Am J Med Genet. 1999 Oct 15;88(5):560-6. PubMed PMID: 10490717.
		Barbulescu M, Turner G, Seaman MI, Deinard AS, Kidd KK, Lenz J. Many human endogenous retrovirus K (HERV-K) proviruses are unique to humans. Curr Biol. 1999 Aug 26;9(16):861-8. PubMed PMID: 10469592.
		Pavelitz T, Liao D, Weiner AM. Concerted evolution of the tandem array encoding primate U2 snRNA (the RNU2 locus) is accompanied by dramatic remodeling of the junctions with flanking chromosomal sequences. EMBO J. 1999 Jul 1;18(13):3783-92. PubMed PMID: 10393193; PubMed Central PMCID: PMC1171455.
		Kim HS, Takenaka O, Crow TJ. Cloning and nucleotide sequence of retroposons specific to hominoid primates derived from an endogenous retrovirus (HERV-K). AIDS Res Hum Retroviruses. 1999 Apr 10;15(6):595-601. PubMed PMID: 10221537.
		Lapuk AV, Khil PP, Lavrentieva IV, Lebedev YB, Sverdlov ED. A human endogenous retrovirus-like (HERV) LTR formed more than 10 million years ago due to an insertion of HERV-H LTR into the 5' LTR of HERV-K is situated on human chromosomes 10, 19 and Y. J Gen Virol. 1999 Apr;80 ( Pt 4):835-9. PubMed PMID: 10211950.
		Mayer J, Meese E, Mueller-Lantzsch N. Human endogenous retrovirus K homologous sequences and their coding capacity in Old World primates. J Virol. 1998 Mar;72(3):1870-5. PubMed PMID: 9499038; PubMed Central PMCID: PMC109477.
		Widegren B, Kjellman C, Aminoff S, Sahlford LG, Sjögren HO. The structure and phylogeny of a new family of human endogenous retroviruses. J Gen Virol. 1996 Aug;77 ( Pt 8):1631-41. PubMed PMID: 8760409.
		Kjellman C, Sjögren HO, Widegren B. The Y chromosome: a graveyard for endogenous retroviruses. Gene. 1995 Aug 19;161(2):163-70. PubMed PMID: 7665072.
		Dangel AW, Baker BJ, Mendoza AR, Yu CY. Complement component C4 gene intron 9 as a phylogenetic marker for primates: long terminal repeats of the endogenous retrovirus ERV-K(C4) are a molecular clock of evolution. Immunogenetics. 1995;42(1):41-52. PubMed PMID: 7797267.
		Horwitz MS, Boyce-Jacino MT, Faras AJ. Novel human endogenous sequences related to human immunodeficiency virus type 1. J Virol. 1992 Apr;66(4):2170-9. PubMed PMID: 1548756; PubMed Central PMCID: PMC289009.
		Shih A, Coutavas EE, Rush MG. Evolutionary implications of primate endogenous retroviruses. Virology. 1991 Jun;182(2):495-502. PubMed PMID: 1708932.
		Sommerfelt MA, Weiss RA. Receptor interference groups of 20 retroviruses plating on human cells. Virology. 1990 May;176(1):58-69. PubMed PMID: 1691887.
		Arima T, Takamizawa A, Mori C, Murakami S, Kaji C, Fujita J. A lambda gt11-cDNA clone specific for chronic hepatitis C generated from pooled serum presumably infected by hepatitis C virus. Gastroenterol Jpn. 1989 Oct;24(5):545-8. PubMed PMID: 2509279.
		O'Connell C, O'Brien S, Nash WG, Cohen M. ERV3, a full-length human endogenous provirus: chromosomal localization and evolutionary relationships. Virology. 1984 Oct 30;138(2):225-35. PubMed PMID: 6495650.
		O'Brien SJ, Bonner TI, Cohen M, O'Connell C, Nash WG. Mapping of an endogenous retroviral sequence to human chromosome 18. Nature. 1983 May 5-11;303(5912):74-7. PubMed PMID: 6843662.
		Bonner TI, Birkenmeier EH, Gonda MA, Mark GE, Searfoss GH, Todaro GJ. Molecular cloning of a family of retroviral sequences found in chimpanzee but not human DNA. J Virol. 1982 Sep;43(3):914-24. PubMed PMID: 6292470; PubMed Central PMCID: PMC256202.
		Tainsky MA. Analysis of the virogenes related to the rhesus monkey endogenous type C retrovirus in monkeys and apes. J Virol. 1981 Mar;37(3):922-30. PubMed PMID: 6262537; PubMed Central PMCID: PMC171089.
		Sherwin SA, Todaro GJ. A new endogenous primate type C virus isolated from the Old World monkey Colobus polykomos. Proc Natl Acad Sci U S A. 1979 Oct;76(10):5041-5. PubMed PMID: 228275; PubMed Central PMCID: PMC413075.
		Schochetman G, Fine DL. Natural distribution of squirrel monkey retrovirus proviral sequences in primate DNAs. J Gen Virol. 1978 Jul;40(1):257-61. PubMed PMID: 99487.
Pan paniscus	Bonobo chimp	Polavarapu N, Bowen NJ, McDonald JF. Identification, characterization and comparative genomics of chimpanzee endogenous retroviruses. Genome Biol. 2006;7(6):R51. PubMed PMID: 16805923; PubMed Central PMCID: PMC1779541.
		Barbulescu M, Turner G, Seaman MI, Deinard AS, Kidd KK, Lenz J. Many human endogenous retrovirus K (HERV-K) proviruses are unique to humans. Curr Biol. 1999 Aug 26;9(16):861-8. PubMed PMID: 10469592.
Gorilla gorilla	Gorilla	Kim HS, Kim DS, Huh JW, Ahn K, Yi JM, Lee JR, Hirai H. Molecularcharacterization of the HERV-W env gene in humans and primates: expression, FISH,phylogeny, and evolution. Mol Cells. 2008 Jul 31;26(1):53-60. Epub 2008 Jun 4.PubMed PMID: 18525236.
		Kaiser SM, Malik HS, Emerman M. Restriction of an extinct retrovirus by thehuman TRIM5alpha antiviral protein. Science. 2007 Jun 22;316(5832):1756-8. PubMedPMID: 17588933.
		Polavarapu N, Bowen NJ, McDonald JF. Identification, characterization andcomparative genomics of chimpanzee endogenous retroviruses. Genome Biol.2006;7(6):R51. PubMed PMID: 16805923; PubMed Central PMCID: PMC1779541.
		Kim HS, Yi JM, Hirai H, Huh JW, Jeong MS, Jang SB, Kim CG, Saitou N, Hyun BH, Lee WH. Human Endogenous Retrovirus (HERV)-R family in primates: Chromosomallocation, gene expression, and evolution. Gene. 2006 Mar 29;370:34-42. Epub 2006 Jan 27. PubMed PMID: 16443335.
		Yohn CT, Jiang Z, McGrath SD, Hayden KE, Khaitovich P, Johnson ME, Eichler MY,McPherson JD, Zhao S, Pääbo S, Eichler EE. Lineage-specific expansions ofretroviral insertions within the genomes of African great apes but not humans andorangutans. PLoS Biol. 2005 Apr;3(4):e110. Epub 2005 Mar 1. PubMed PMID:15737067; PubMed Central PMCID: PMC1054887.
		Bonnaud B, Bouton O, Oriol G, Cheynet V, Duret L, Mallet F. Evidence ofselection on the domesticated ERVWE1 env retroviral element involved inplacentation. Mol Biol Evol. 2004 Oct;21(10):1895-901. Epub 2004 Jul 14. PubMedPMID: 15254254.
		Bosch E, Hurles ME, Navarro A, Jobling MA. Dynamics of a human interparaloggene conversion hotspot. Genome Res. 2004 May;14(5):835-44. PubMed PMID:15123583; PubMed Central PMCID: PMC479110.
		Denner J. Porcine endogenous retroviruses (PERVs) and xenotransplantation:screening for transmission in several clinical trials and in experimental models using non-human primates. Ann Transplant. 2003;8(3):39-48. PubMed PMID: 15114938.
		Hervé CA, Forrest G, Löwer R, Griffiths DJ, Venables PJ. Conservation and lossof the ERV3 open reading frame in primates. Genomics. 2004 May;83(5):940-3.PubMed PMID: 15081124.
		Mallet F, Bouton O, Prudhomme S, Cheynet V, Oriol G, Bonnaud B, Lucotte G,Duret L, Mandrand B. The endogenous retroviral locus ERVWE1 is a bona fide geneinvolved in hominoid placental physiology. Proc Natl Acad Sci U S A. 2004 Feb10;101(6):1731-6. Epub 2004 Feb 2. PubMed PMID: 14757826; PubMed Central PMCID:PMC341840.
		Bénit L, Calteau A, Heidmann T. Characterization of the low-copy HERV-Fcfamily: evidence for recent integrations in primates of elements with codingenvelope genes. Virology. 2003 Jul 20;312(1):159-68. PubMed PMID: 12890629.
		Huh JW, Hong KW, Yi JM, Kim TH, Takenaka O, Lee WH, Kim HS. Molecularphylogeny and evolution of the human endogenous retrovirus HERV-W LTR family inhominoid primates. Mol Cells. 2003 Feb 28;15(1):122-6. PubMed PMID: 12661771.
		Vinogradova TV, Zhulidov PA, Illarionova AE, Sverdlov ED. [A new KIAA1245gene family with or without HERV-K LTRs in their introns]. Bioorg Khim. 2002Jul-Aug;28(4):346-50. Russian. PubMed PMID: 12197392.
		Nadezhdin EV, Lebedev YB, Glazkova DV, Bornholdt D, Arman IP, Grzeschik KH,Hunsmann G, Sverdlov ED. Identification of paralogous HERV-K LTRs on humanchromosomes 3, 4, 7 and 11 in regions containing clusters of olfactory receptorgenes. Mol Genet Genomics. 2001 Jul;265(5):820-5. PubMed PMID: 11523799.
		Barbulescu M, Turner G, Su M, Kim R, Jensen-Seaman MI, Deinard AS, Kidd KK,Lenz J. A HERV-K provirus in chimpanzees, bonobos and gorillas, but not humans.Curr Biol. 2001 May 15;11(10):779-83. PubMed PMID: 11378389.
		Cantrell MA, Grahn RA, Scott L, Wichman HA. Isolation of markers fromrecently transposed LINE-1 retrotransposons. Biotechniques. 2000Dec;29(6):1310-6. PubMed PMID: 11126134.
		Lapuk AV, Lebedev YuB, Sverdlov ED. Human endogenous retrovirus HERV-K/HERV-Hevolution in the genome of primates. Dokl Biochem. 2000 Jul-Aug;373(1-6):150-2.PubMed PMID: 11002847.
		Blusch JH, Patience C, Takeuchi Y, Templin C, Roos C, Von Der Helm K,Steinhoff G, Martin U. Infection of nonhuman primate cells by pig endogenousretrovirus. J Virol. 2000 Aug;74(16):7687-90. PubMed PMID: 10906227; PubMedCentral PMCID: PMC112294.
		Kim HS, Wadekar RV, Takenaka O, Hyun BH, Crow TJ. Phylogenetic analysis of a retroposon family in african great apes. J Mol Evol. 1999 Nov;49(5):699-702.PubMed PMID: 10552051.
		Kim HS, Wadekar RV, Takenaka O, Hyun BH, Crow TJ. Phylogenetic analysis ofHERV-K LTR-like elements in primates: presence in some new world monkeys andevidence of recent parallel evolution in these species and in homo sapiens. Arch Virol. 1999;144(10):2035-40. PubMed PMID: 10550675.
		Barbulescu M, Turner G, Seaman MI, Deinard AS, Kidd KK, Lenz J. Many humanendogenous retrovirus K (HERV-K) proviruses are unique to humans. Curr Biol. 1999Aug 26;9(16):861-8. PubMed PMID: 10469592.
		Pavelitz T, Liao D, Weiner AM. Concerted evolution of the tandem arrayencoding primate U2 snRNA (the RNU2 locus) is accompanied by dramatic remodeling of the junctions with flanking chromosomal sequences. EMBO J. 1999 Jul1;18(13):3783-92. PubMed PMID: 10393193; PubMed Central PMCID: PMC1171455.
		Kim HS, Takenaka O, Crow TJ. Cloning and nucleotide sequence of retroposonsspecific to hominoid primates derived from an endogenous retrovirus (HERV-K).AIDS Res Hum Retroviruses. 1999 Apr 10;15(6):595-601. PubMed PMID: 10221537.
		Lapuk AV, Khil PP, Lavrentieva IV, Lebedev YB, Sverdlov ED. A humanendogenous retrovirus-like (HERV) LTR formed more than 10 million years ago dueto an insertion of HERV-H LTR into the 5' LTR of HERV-K is situated on humanchromosomes 10, 19 and Y. J Gen Virol. 1999 Apr;80 ( Pt 4):835-9. PubMed PMID:10211950.
		Long Q, Bengra C, Li C, Kutlar F, Tuan D. A long terminal repeat of the humanendogenous retrovirus ERV-9 is located in the 5' boundary area of the humanbeta-globin locus control region. Genomics. 1998 Dec 15;54(3):542-55. PubMedPMID: 9878258.
		Mayer J, Meese E, Mueller-Lantzsch N. Human endogenous retrovirus Khomologous sequences and their coding capacity in Old World primates. J Virol.1998 Mar;72(3):1870-5. PubMed PMID: 9499038; PubMed Central PMCID: PMC109477.
		Dangel AW, Baker BJ, Mendoza AR, Yu CY. Complement component C4 gene intron 9as a phylogenetic marker for primates: long terminal repeats of the endogenousretrovirus ERV-K(C4) are a molecular clock of evolution. Immunogenetics.1995;42(1):41-52. PubMed PMID: 7797267.
		Shih A, Coutavas EE, Rush MG. Evolutionary implications of primate endogenousretroviruses. Virology. 1991 Jun;182(2):495-502. PubMed PMID: 1708932.
		Johansen T, Holm T, Bjørklid E. Members of the RTVL-H family of humanendogenous retrovirus-like elements are expressed in placenta. Gene. 1989 Jul15;79(2):259-67. PubMed PMID: 2551777.
		Bonner TI, Birkenmeier EH, Gonda MA, Mark GE, Searfoss GH, Todaro GJ.Molecular cloning of a family of retroviral sequences found in chimpanzee but nothuman DNA. J Virol. 1982 Sep;43(3):914-24. PubMed PMID: 6292470; PubMed CentralPMCID: PMC256202.
		Tainsky MA. Analysis of the virogenes related to the rhesus monkey endogenoustype C retrovirus in monkeys and apes. J Virol. 1981 Mar;37(3):922-30. PubMedPMID: 6262537; PubMed Central PMCID: PMC171089.
Pongo pygmaeus	Orangutan	Polavarapu N, Bowen NJ, McDonald JF. Identification, characterization and comparative genomics of chimpanzee endogenous retroviruses. Genome Biol. 2006;7(6):R51. PubMed PMID: 16805923; PubMed Central PMCID: PMC1779541.
		Yohn CT, Jiang Z, McGrath SD, Hayden KE, Khaitovich P, Johnson ME, Eichler MY, McPherson JD, Zhao S, Pääbo S, Eichler EE. Lineage-specific expansions of retroviral insertions within the genomes of African great apes but not humans and orangutans. PLoS Biol. 2005 Apr;3(4):e110. Epub 2005 Mar 1. PubMed PMID: 15737067; PubMed Central PMCID: PMC1054887.
		Yue Y, Grossmann B, Ferguson-Smith M, Yang F, Haaf T. Comparative cytogenetics of human chromosome 3q21.3 reveals a hot spot for ectopic recombination in hominoid evolution. Genomics. 2005 Jan;85(1):36-47. PubMed PMID: 15607420.
		Bonnaud B, Bouton O, Oriol G, Cheynet V, Duret L, Mallet F. Evidence of selection on the domesticated ERVWE1 env retroviral element involved in placentation. Mol Biol Evol. 2004 Oct;21(10):1895-901. Epub 2004 Jul 14. PubMed PMID: 15254254.
		Mallet F, Bouton O, Prudhomme S, Cheynet V, Oriol G, Bonnaud B, Lucotte G, Duret L, Mandrand B. The endogenous retroviral locus ERVWE1 is a bona fide gene involved in hominoid placental physiology. Proc Natl Acad Sci U S A. 2004 Feb 10;101(6):1731-6. Epub 2004 Feb 2. PubMed PMID: 14757826; PubMed Central PMCID: PMC341840.
		Bénit L, Calteau A, Heidmann T. Characterization of the low-copy HERV-Fc family: evidence for recent integrations in primates of elements with coding envelope genes. Virology. 2003 Jul 20;312(1):159-68. PubMed PMID: 12890629.
		Huh JW, Hong KW, Yi JM, Kim TH, Takenaka O, Lee WH, Kim HS. Molecular phylogeny and evolution of the human endogenous retrovirus HERV-W LTR family in hominoid primates. Mol Cells. 2003 Feb 28;15(1):122-6. PubMed PMID: 12661771.
		Vinogradova TV, Zhulidov PA, Illarionova AE, Sverdlov ED. [A new KIAA1245 gene family with or without HERV-K LTRs in their introns]. Bioorg Khim. 2002 Jul-Aug;28(4):346-50. Russian. PubMed PMID: 12197392.
		Ling J, Pi W, Bollag R, Zeng S, Keskintepe M, Saliman H, Krantz S, Whitney B, Tuan D. The solitary long terminal repeats of ERV-9 endogenous retrovirus are conserved during primate evolution and possess enhancer activities in embryonic and hematopoietic cells. J Virol. 2002 Mar;76(5):2410-23. PubMed PMID: 11836419; PubMed Central PMCID: PMC153808.
		Kim HS, Takenaka O. Phylogeny of SINE-R retroposons in Asian apes. Mol Cells. 2001 Oct 31;12(2):262-6. PubMed PMID: 11710532.
		Schneider PM, Witzel-Schlömp K, Steinhauer C, Stradmann-Bellinghausen B, Rittner C. Rapid detection of the ERV-K(C4) retroviral insertion reveals further structural polymorphism of the complement C4 genes in old world primates. Exp Clin Immunogenet. 2001;18(3):130-4. PubMed PMID: 11549842.
		Nadezhdin EV, Lebedev YB, Glazkova DV, Bornholdt D, Arman IP, Grzeschik KH, Hunsmann G, Sverdlov ED. Identification of paralogous HERV-K LTRs on human chromosomes 3, 4, 7 and 11 in regions containing clusters of olfactory receptor genes. Mol Genet Genomics. 2001 Jul;265(5):820-5. PubMed PMID: 11523799.
		Kim HS, Wadekar RV, Takenaka O, Hyun BH, Crow TJ. Phylogenetic analysis of a retroposon family in african great apes. J Mol Evol. 1999 Nov;49(5):699-702. PubMed PMID: 10552051.
		Kjellman C, Sjögren HO, Widegren B. HERV-F, a new group of human endogenous retrovirus sequences. J Gen Virol. 1999 Sep;80 ( Pt 9):2383-92. PubMed PMID: 10501491.
		Barbulescu M, Turner G, Seaman MI, Deinard AS, Kidd KK, Lenz J. Many human endogenous retrovirus K (HERV-K) proviruses are unique to humans. Curr Biol. 1999 Aug 26;9(16):861-8. PubMed PMID: 10469592.
		Lindeskog M, Mager DL, Blomberg J. Isolation of a human endogenous retroviral HERV-H element with an open env reading frame. Virology. 1999 Jun 5;258(2):441-50. PubMed PMID: 10366582.
		Kim HS, Takenaka O, Crow TJ. Cloning and nucleotide sequence of retroposons specific to hominoid primates derived from an endogenous retrovirus (HERV-K). AIDS Res Hum Retroviruses. 1999 Apr 10;15(6):595-601. PubMed PMID: 10221537.
		Lapuk AV, Khil PP, Lavrentieva IV, Lebedev YB, Sverdlov ED. A human endogenous retrovirus-like (HERV) LTR formed more than 10 million years ago due to an insertion of HERV-H LTR into the 5' LTR of HERV-K is situated on human chromosomes 10, 19 and Y. J Gen Virol. 1999 Apr;80 ( Pt 4):835-9. PubMed PMID: 10211950.
		Mayer J, Meese E, Mueller-Lantzsch N. Human endogenous retrovirus K homologous sequences and their coding capacity in Old World primates. J Virol. 1998 Mar;72(3):1870-5. PubMed PMID: 9499038; PubMed Central PMCID: PMC109477.
		Widegren B, Kjellman C, Aminoff S, Sahlford LG, Sjögren HO. The structure and phylogeny of a new family of human endogenous retroviruses. J Gen Virol. 1996 Aug;77 ( Pt 8):1631-41. PubMed PMID: 8760409.
		Kjellman C, Sjögren HO, Widegren B. The Y chromosome: a graveyard for endogenous retroviruses. Gene. 1995 Aug 19;161(2):163-70. PubMed PMID: 7665072.
		Dangel AW, Baker BJ, Mendoza AR, Yu CY. Complement component C4 gene intron 9 as a phylogenetic marker for primates: long terminal repeats of the endogenous retrovirus ERV-K(C4) are a molecular clock of evolution. Immunogenetics. 1995;42(1):41-52. PubMed PMID: 7797267.
		Tassabehji M, Strachan T, Anderson M, Campbell RD, Collier S, Lako M. Identification of a novel family of human endogenous retroviruses and characterization of one family member, HERV-K(C4), located in the complement C4 gene cluster. Nucleic Acids Res. 1994 Dec 11;22(24):5211-7. PubMed PMID: 7816608; PubMed Central PMCID: PMC332062.
		Bonner TI, Birkenmeier EH, Gonda MA, Mark GE, Searfoss GH, Todaro GJ. Molecular cloning of a family of retroviral sequences found in chimpanzee but not human DNA. J Virol. 1982 Sep;43(3):914-24. PubMed PMID: 6292470; PubMed Central PMCID: PMC256202.
		Tainsky MA. Analysis of the virogenes related to the rhesus monkey endogenous type C retrovirus in monkeys and apes. J Virol. 1981 Mar;37(3):922-30. PubMed PMID: 6262537; PubMed Central PMCID: PMC171089.
Homo sapiens	Human	Wu L. Cellular and Biochemical Mechanisms of the Retroviral Restriction Factor SAMHD1. ISRN Biochem. 2013 Jul 7;2013. pii: 728392. PubMed PMID: 24523981; PubMed Central PMCID: PMC3918895.
		Perron H, Dougier-Reynaud HL, Lomparski C, Popa I, Firouzi R, Bertrand JB, Marusic S, Portoukalian J, Jouvin-Marche E, Villiers CL, Touraine JL, Marche PN. Human endogenous retrovirus protein activates innate immunity and promotes experimental allergic encephalomyelitis in mice. PLoS One. 2013 Dec 6;8(12):e80128. doi: 10.1371/journal.pone.0080128. eCollection 2013. PubMed PMID: 24324591; PubMed C…
		Romano CM. Erratum: Genomic analysis of ERVWE2 locus in patients with Multiple sclerosis: absence of genetic association but potential role of Human Endogenous retrovirus type W elements in molecular mimicry with myelin antigen. Front Microbiol. 2013 Nov 18;4:345. eCollection 2013. PubMed PMID: 24302922; PubMed Central PMCID: PMC3831600.
		Choi JY, Gwon YD, Kim JK, Cho YD, Heo YK, Cho HS, Choi TJ, Poo HR, Oh YK, Kim YB. Protective efficacy of a human endogenous retrovirus envelope-coated, nonreplicable, baculovirus-based hemagglutin vaccine against pandemic influenza H1N1 2009. PLoS One. 2013 Nov 18;8(11):e80762. doi: 10.1371/journal.pone.0080762. eCollection 2013. PubMed PMID: 24260476; PubMed Central PMCID: PMC3832454.
		Lisanti S, Omar WA, Tomaszewski B, De Prins S, Jacobs G, Koppen G, Mathers JC, Langie SA. Comparison of methods for quantification of global DNA methylation in human cells and tissues. PLoS One. 2013 Nov 18;8(11):e79044. doi: 10.1371/journal.pone.0079044. eCollection 2013. PubMed PMID: 24260150; PubMed Central PMCID: PMC3832524.
		Mameli G, Madeddu G, Mei A, Uleri E, Poddighe L, Delogu LG, Maida I, Babudieri S, Serra C, Manetti R, Mura MS, Dolei A. Activation of MSRV-type endogenous retroviruses during infectious mononucleosis and Epstein-Barr virus latency: the missing link with multiple sclerosis? PLoS One. 2013 Nov 13;8(11):e78474. doi: 10.1371/journal.pone.0078474. eCollection 2013. PubMed PMID: 24236019; PubMed Centra…
		Zwolińska K, Knysz B, Gąsiorowski J, Pazgan-Simon M, Gładysz A, Sobczyński M, Piasecki E. Frequency of human endogenous retroviral sequences (HERV) K113 and K115 in the Polish population, and their effect on HIV infection. PLoS One. 2013 Oct 28;8(10):e77820. doi: 10.1371/journal.pone.0077820. eCollection 2013. PubMed PMID: 24204983; PubMed Central PMCID: PMC3810129.
		Agoni L, Lenz J, Guha C. Variant splicing and influence of ionizing radiation on human endogenous retrovirus K (HERV-K) transcripts in cancer cell lines. PLoS One. 2013 Oct 18;8(10):e76472. doi: 10.1371/journal.pone.0076472. eCollection 2013. PubMed PMID: 24204631; PubMed Central PMCID: PMC3799738.
		Halligan BD, Sun HY, Kushnaryov VM, Grossberg SE. Partial molecular cloning of the JHK retrovirus using gammaretrovirus consensus PCR primers. Future Virol. 2013 May;8(5):507-520. PubMed PMID: 24159361; PubMed Central PMCID: PMC3801167.
		Maliniemi P, Vincendeau M, Mayer J, Frank O, Hahtola S, Karenko L, Carlsson E, Mallet F, Seifarth W, Leib-Mösch C, Ranki A. Expression of human endogenous retrovirus-w including syncytin-1 in cutaneous T-cell lymphoma. PLoS One. 2013 Oct 1;8(10):e76281. doi: 10.1371/journal.pone.0076281. eCollection 2013. PubMed PMID: 24098463; PubMed Central PMCID: PMC3788054.
		Nexø BA, Hansen B, Nissen KK, Gundestrup L, Terkelsen T, Villesen P, Bahrami S, Petersen T, Pedersen FS, Laska MJ. Restriction genes for retroviruses influence the risk of multiple sclerosis. PLoS One. 2013 Sep 16;8(9):e74063. doi: 10.1371/journal.pone.0074063. eCollection 2013. PubMed PMID: 24066097; PubMed Central PMCID: PMC3774660.
		Kraus B, Fischer K, Büchner SM, Wels WS, Löwer R, Sliva K, Schnierle BS. Vaccination directed against the human endogenous retrovirus-K envelope protein inhibits tumor growth in a murine model system. PLoS One. 2013 Aug 30;8(8):e72756. doi: 10.1371/journal.pone.0072756. eCollection 2013. PubMed PMID: 24023643; PubMed Central PMCID: PMC3758348.
[truncated: 2,124 more rows]
